# Supplementary material for: Natural killer (NK) cell-derived extracellular-vesicle shuttled microRNAs control T cell responses
Source: eLife. 2022 Jul 29;11:e76319. doi: 10.7554/eLife.76319 (PMC9366747; doi:10.7554/eLife.76319)
Supplement: Supplementary file 1. — Table summarizes the analysis of samples generated from five donors, showing differentially expressed microRNAs (miRNAs). Provided as an additional Excel file. [file elife-76319-supp1.xlsx]

## Sheet: NK-ACTvsNK-EVs
ID	AvrExp	Norm_Activated1	Raw_Activated1	Norm_Activated 2	Raw_Activated 2	Norm_Activated 3	Raw_Activated 3	Norm_Activated 4	Raw_Activated 4	Norm_Activated 5	Raw_Activated 5	Norm_NKEVS 1	Raw_NKEVS 1	Norm_NKEVS 2	Raw_NKEVS 2	Norm_NKEVS 3	Raw_NKEVS 3	Norm_NKEVS 4	Raw_NKEVS 4	Norm_NKEVS 5	Raw_NKEVS 5	ave_ACT	ave_EXO	foldChange	logFC	P.Value	adj.P.Val
hsa-miR-10b-5p	90.0946	0.173575	0	0.281074	0	0.296284	0	0.369864	0	0.698929	1	396.884	155	324.716	174	176.748	49	199.545	61	245.407	54	0.363945	268.66	-806.096	-9.65481	3.31714e-15	1.17427e-12
hsa-miR-122-5p	74.2525	0.173575	0	0.281074	0	0.296284	0	0.369864	0	0.232976	0	251.403	98	216.788	116	176.748	49	134.653	41	330.962	73	0.270755	222.11	-805.666	-9.65404	1.80682e-16	1.27923e-13
hsa-miR-127-3p	21.8067	0.173575	0	0.281074	0	0.888853	1	0.369864	0	0.698929	1	90.607	35	45.5905	24	55.3452	15	56.7812	17	47.2803	10	0.482459	59.1208	-143.05	-7.16037	1.07656e-10	1.27034e-08
hsa-miR-409-3p	12.1439	0.173575	0	0.281074	0	0.296284	0	0.369864	0	0.232976	0	39.5608	15	30.7038	16	26.7799	7	17.8455	5	20.263	4	0.270755	27.0306	-100.804	-6.65542	2.31185e-08	5.27997e-07
hsa-miR-126-3p	371.969	3.29792	9	8.7133	15	9.18481	15	9.2466	12	8.62013	18	728.684	285	784.343	421	412.411	115	507.787	156	790.256	175	7.81255	644.696	-89.4309	-6.4827	8.46262e-10	5.11769e-08
hsa-miR-379-5p	13.4815	0.173575	0	0.281074	0	0.296284	0	0.369864	0	1.16488	2	37.0085	14	32.5647	17	30.3506	8	14.6009	4	56.2861	12	0.457136	34.1621	-86.2565	-6.43056	1.28901e-08	3.18871e-07
hsa-miR-126-5p	20.7997	0.520725	1	0.843222	1	0.296284	0	0.369864	0	0.232976	0	39.5608	15	47.4514	25	37.4919	10	24.3348	7	20.263	4	0.452614	33.8204	-81.2483	-6.34427	8.31558e-09	2.2644e-07
hsa-miR-451a	58.2433	0.867874	2	1.40537	2	2.66656	4	5.54796	7	0.232976	0	98.2639	38	120.024	64	123.188	34	73.0044	22	96.812	21	2.14415	102.258	-79.711	-6.31671	1.17315e-09	5.90905e-08
hsa-miR-411-5p	8.79376	0.173575	0	0.281074	0	0.296284	0	0.369864	0	0.232976	0	16.59	6	26.9821	14	26.7799	7	17.8455	5	15.7601	3	0.270755	20.7915	-77.9168	-6.28386	6.68275e-09	1.89256e-07
hsa-miR-382-5p	6.35444	0.173575	0	0.281074	0	0.296284	0	0.369864	0	0.232976	0	26.7993	10	17.678	9	8.92664	2	11.3562	3	15.7601	3	0.270755	16.104	-58.1079	-5.86066	3.36858e-08	7.45298e-07
hsa-miR-486-5p	40.7186	1.56217	4	0.843222	1	5.6294	9	2.58905	3	1.16488	2	121.235	47	116.302	62	91.0517	25	73.0044	22	96.812	21	2.35774	99.6811	-54.216	-5.76065	3.00921e-10	3.04361e-08
hsa-miR-543	6.91278	0.173575	0	0.281074	0	0.296284	0	0.369864	0	0.232976	0	24.2469	9	13.9563	7	8.92664	2	11.3562	3	15.7601	3	0.270755	14.8492	-53.8564	-5.75105	2.17374e-07	3.37719e-06
hsa-miR-432-5p	7.0709	0.173575	0	0.281074	0	0.296284	0	0.369864	0	0.232976	0	24.2469	9	28.843	15	37.4919	10	4.86696	1	2.25144	0	0.270755	19.54	-50.0288	-5.64469	2.83573e-07	4.1827e-06
hsa-miR-143-3p	317.874	2.60362	7	10.3997	18	19.851	33	12.9452	17	6.29036	13	550.023	215	447.531	240	266.014	74	326.087	100	380.494	84	10.418	394.03	-48.8917	-5.61152	2.54438e-05	0.000194479
hsa-miR-381-3p	17.9148	0.520725	1	2.52967	4	0.888853	1	0.369864	0	0.698929	1	59.9793	23	23.2605	12	19.6386	5	34.0687	10	51.7832	11	1.00161	37.7461	-43.1488	-5.43125	2.12794e-06	2.42997e-05
hsa-miR-493-5p	5.49632	0.173575	0	0.281074	0	0.296284	0	0.369864	0	0.232976	0	21.6946	8	21.3996	11	5.35599	1	8.11161	2	2.25144	0	0.270755	11.7627	-34.6441	-5.11454	2.63274e-06	2.86766e-05
hsa-miR-411-3p	3.76273	0.173575	0	0.281074	0	0.296284	0	0.369864	0	0.232976	0	6.38077	2	10.2346	5	5.35599	1	8.11161	2	15.7601	3	0.270755	9.16861	-32.2516	-5.0113	1.07302e-07	2.05325e-06
hsa-miR-144-3p	14.8816	0.520725	1	3.09181	5	1.48142	2	0.369864	0	0.698929	1	29.3516	11	38.1472	20	23.2093	6	14.6009	4	24.7659	5	1.23255	26.015	-28.1259	-4.81383	4.07582e-08	8.4873e-07
hsa-miR-5787	4.0125	0.173575	0	0.281074	0	0.296284	0	0.369864	0	0.698929	1	8.93308	3	6.51293	3	33.9212	9	4.86696	1	2.25144	0	0.363945	11.2971	-22.921	-4.5186	2.19422e-07	3.37719e-06
hsa-miR-433-3p	3.39778	0.173575	0	0.281074	0	0.888853	1	0.369864	0	0.232976	0	16.59	6	10.2346	5	8.92664	2	1.62232	0	6.75433	1	0.389268	8.82558	-21.9984	-4.45932	2.45871e-06	2.71995e-05
hsa-miR-136-3p	3.1572	0.173575	0	0.281074	0	0.296284	0	0.369864	0	0.232976	0	11.4854	4	6.51293	3	1.78533	0	4.86696	1	6.75433	1	0.270755	6.28099	-20.7405	-4.37438	9.86466e-06	9.35677e-05
hsa-miR-495-3p	3.33898	0.173575	0	0.281074	0	0.296284	0	0.369864	0	0.232976	0	3.82846	1	4.65209	2	1.78533	0	4.86696	1	15.7601	3	0.270755	6.17859	-17.8491	-4.15778	4.32262e-05	0.000291468
hsa-miR-299-3p	1.98483	0.173575	0	0.281074	0	0.296284	0	0.369864	0	0.232976	0	8.93308	3	8.37377	4	5.35599	1	1.62232	0	2.25144	0	0.270755	5.30732	-16.9682	-4.08476	1.39287e-07	2.5286e-06
hsa-miR-224-5p	2.82456	0.173575	0	0.281074	0	0.296284	0	0.369864	0	0.232976	0	3.82846	1	0.930419	0	1.78533	0	11.3562	3	20.263	4	0.270755	7.63269	-15.4126	-3.94604	1.70976e-05	0.000151314
hsa-miR-205-5p	2.63957	0.173575	0	0.281074	0	0.296284	0	0.369864	0	0.232976	0	21.6946	8	0.930419	0	5.35599	1	1.62232	0	6.75433	1	0.270755	7.27154	-15.2265	-3.92851	8.1836e-06	8.27713e-05
hsa-miR-1273g-3p	7.39193	0.173575	0	1.40537	2	2.07399	3	1.10959	1	0.232976	0	3.82846	1	6.51293	3	8.92664	2	17.8455	5	24.7659	5	0.999101	12.3759	-15.0661	-3.91324	8.16627e-05	0.000482109
hsa-miR-30a-3p	2.72457	0.173575	0	0.281074	0	0.296284	0	1.10959	1	0.232976	0	16.59	6	6.51293	3	5.35599	1	1.62232	0	2.25144	0	0.4187	6.46654	-14.7784	-3.88542	1.96778e-05	0.000160136
hsa-miR-370-3p	5.06093	0.173575	0	0.281074	0	0.888853	1	0.369864	0	0.232976	0	8.93308	3	4.65209	2	1.78533	0	4.86696	1	6.75433	1	0.389268	5.39836	-14.7515	-3.88279	0.000124583	0.000683759
hsa-miR-345-3p	2.03832	0.520725	1	0.281074	0	0.296284	0	0.369864	0	0.232976	0	8.93308	3	4.65209	2	1.78533	0	4.86696	1	6.75433	1	0.340185	5.39836	-14.5435	-3.8623	9.06538e-08	1.78286e-06
hsa-miR-1468-5p	15.4165	1.56217	4	0.843222	1	1.48142	2	1.10959	1	2.56274	5	34.4562	13	30.7038	16	5.35599	1	24.3348	7	20.263	4	1.51183	23.0228	-14.1854	-3.82634	2.15652e-07	3.37719e-06
hsa-miR-410-3p	1.9482	0.173575	0	0.281074	0	0.296284	0	0.369864	0	0.232976	0	1.27615	0	4.65209	2	8.92664	2	4.86696	1	2.25144	0	0.270755	4.39466	-13.584	-3.76384	1.62218e-05	0.000146607
hsa-miR-412-5p	1.76449	0.173575	0	0.281074	0	0.296284	0	0.369864	0	0.232976	0	1.27615	0	4.65209	2	8.92664	2	1.62232	0	6.75433	1	0.270755	4.64631	-13.4215	-3.74648	1.07725e-06	1.33806e-05
hsa-miR-139-5p	30.5657	4.33937	12	3.09181	5	9.77738	16	1.84932	2	7.68822	16	65.0839	25	60.4772	32	37.4919	10	56.7812	17	92.3091	20	5.34922	62.4287	-12.9848	-3.69876	1.30611e-08	3.18871e-07
hsa-miR-6821-5p	3.00062	0.173575	0	0.281074	0	0.296284	0	1.84932	2	0.698929	1	1.27615	0	17.678	9	12.4973	3	1.62232	0	6.75433	1	0.659836	7.96561	-11.4999	-3.52355	8.23014e-05	0.000482109
hsa-miR-204-5p	2.7006	0.520725	1	0.281074	0	0.296284	0	0.369864	0	0.698929	1	6.38077	2	10.2346	5	1.78533	0	1.62232	0	11.2572	2	0.433375	6.25605	-11.4778	-3.52077	2.55175e-05	0.000194479
hsa-miR-493-3p	1.66266	0.173575	0	0.281074	0	0.296284	0	0.369864	0	0.232976	0	1.27615	0	2.79126	1	1.78533	0	4.86696	1	6.75433	1	0.270755	3.49481	-10.9168	-3.44848	1.96632e-05	0.000160136
hsa-miR-125b-5p	30.5698	2.25647	6	3.09181	5	4.44426	7	7.76714	10	10.018	21	77.8454	30	36.2863	19	37.4919	10	30.8241	9	83.3034	18	5.51554	53.1502	-10.4143	-3.3805	3.43528e-07	4.86435e-06
hsa-miR-369-3p	1.54477	0.173575	0	0.281074	0	0.296284	0	0.369864	0	0.232976	0	3.82846	1	4.65209	2	1.78533	0	1.62232	0	2.25144	0	0.270755	2.82793	-10.0667	-3.33152	2.73699e-05	0.000203977
hsa-miR-487b-3p	1.47205	0.173575	0	0.281074	0	0.296284	0	0.369864	0	0.232976	0	6.38077	2	2.79126	1	1.78533	0	1.62232	0	2.25144	0	0.270755	2.96622	-9.99128	-3.32067	5.46557e-05	0.000351784
hsa-miR-203a-3p	8.62778	0.520725	1	0.281074	0	0.888853	1	0.369864	0	1.16488	2	108.473	42	4.65209	2	1.78533	0	1.62232	0	2.25144	0	0.645079	23.7569	-9.40782	-3.23386	0.00171414	0.00622363
hsa-miR-30a-5p	4.2124	0.867874	2	0.281074	0	3.25913	5	0.369864	0	0.232976	0	14.0377	5	0.930419	0	19.6386	5	1.62232	0	15.7601	3	1.00218	10.3978	-9.30665	-3.21826	0.000960694	0.00390903
hsa-miR-144-5p	2.34277	0.520725	1	0.281074	0	0.296284	0	0.369864	0	0.232976	0	1.27615	0	8.37377	4	1.78533	0	1.62232	0	6.75433	1	0.340185	3.96238	-8.92381	-3.15766	9.91231e-05	0.000561433
hsa-miR-3187-5p	1.30565	0.173575	0	0.281074	0	0.296284	0	0.369864	0	0.232976	0	1.27615	0	2.79126	1	5.35599	1	1.62232	0	2.25144	0	0.270755	2.65943	-8.88586	-3.15151	4.11335e-05	0.000285385
hsa-miR-193a-5p	21.6765	2.95077	8	2.52967	4	7.99967	13	4.80823	6	2.56274	5	47.2177	18	38.1472	20	41.0626	11	53.5366	16	6.75433	1	4.17022	37.3437	-8.74375	-3.12825	4.94451e-06	5.14811e-05
hsa-miR-760	2.03913	0.173575	0	0.281074	0	0.296284	0	1.10959	1	1.16488	2	8.93308	3	4.65209	2	1.78533	0	1.62232	0	6.75433	1	0.605081	4.74943	-8.72969	-3.12593	5.66647e-05	0.000358202
hsa-let-7c-5p	25.9845	4.33937	12	9.27544	16	1.48142	2	4.0685	5	5.35846	11	108.473	42	49.3122	26	1.78533	0	56.7812	17	92.3091	20	4.90464	61.7322	-8.54741	-3.09549	0.000415919	0.00191215
hsa-miR-4448	17.4002	6.76942	19	5.34041	9	6.22197	10	4.80823	6	3.49465	7	52.3224	20	40.008	21	51.7745	14	27.5795	8	47.2803	10	5.32693	43.7929	-8.13304	-3.0238	4.55443e-08	9.21296e-07
hsa-miR-1244	1.55039	0.173575	0	0.843222	1	0.296284	0	0.369864	0	0.232976	0	6.38077	2	2.79126	1	1.78533	0	1.62232	0	2.25144	0	0.383184	2.96622	-8.08517	-3.01528	4.09648e-05	0.000285385
hsa-miR-143-5p	1.60895	0.867874	2	0.281074	0	0.296284	0	0.369864	0	0.232976	0	3.82846	1	2.79126	1	1.78533	0	4.86696	1	2.25144	0	0.409615	3.10469	-7.96351	-2.9934	0.000189247	0.000978009
hsa-miR-135a-3p	1.45363	0.173575	0	0.281074	0	1.48142	2	0.369864	0	0.232976	0	8.93308	3	2.79126	1	1.78533	0	1.62232	0	2.25144	0	0.507782	3.47669	-7.89394	-2.98074	6.18147e-05	0.000380222
hsa-miR-1185-1-3p	2.27877	0.173575	0	0.281074	0	0.296284	0	0.369864	0	0.232976	0	1.27615	0	0.930419	0	1.78533	0	1.62232	0	11.2572	2	0.270755	3.37429	-7.75353	-2.95485	0.00233079	0.00833433
hsa-miR-199a-5p	34.8008	5.72797	16	3.65396	6	7.99967	13	7.76714	10	3.9606	8	62.5316	24	43.7297	23	33.9212	9	21.0902	6	47.2803	10	5.82187	41.7106	-7.24891	-2.85776	0.000197272	0.00101209
hsa-miR-1908-3p	1.43427	0.520725	1	0.281074	0	0.888853	1	0.369864	0	0.232976	0	3.82846	1	2.79126	1	1.78533	0	1.62232	0	6.75433	1	0.458698	3.35634	-7.10854	-2.82955	3.0273e-05	0.000223263
hsa-miR-654-3p	3.44874	0.173575	0	0.281074	0	0.296284	0	0.369864	0	0.232976	0	3.82846	1	0.930419	0	1.78533	0	1.62232	0	2.25144	0	0.270755	2.0836	-7.0835	-2.82446	0.0055992	0.0163137
hsa-miR-214-5p	1.59325	0.520725	1	0.281074	0	0.296284	0	0.369864	0	0.698929	1	1.27615	0	2.79126	1	5.35599	1	4.86696	1	2.25144	0	0.433375	3.30836	-7.02188	-2.81186	4.95563e-05	0.000324869
hsa-miR-100-5p	56.6307	11.6295	33	5.34041	9	8.59224	14	1.84932	2	19.337	41	105.921	41	62.3381	33	26.7799	7	34.0687	10	51.7832	11	9.34971	56.1782	-6.78914	-2.76323	0.00717177	0.0200696
hsa-miR-6877-5p	1.62887	0.173575	0	0.281074	0	1.48142	2	0.369864	0	1.16488	2	3.82846	1	4.65209	2	5.35599	1	1.62232	0	2.25144	0	0.694163	3.54206	-6.65102	-2.73358	0.000105139	0.000590783
hsa-miR-1-3p	51.7207	1.90932	5	1.96752	3	2.07399	3	1.10959	1	1.63084	3	42.1131	16	17.678	9	5.35599	1	14.6009	4	2.25144	0	1.73825	16.3999	-6.58331	-2.71881	0.000957153	0.00390903
hsa-miR-320c	55.3804	17.8782	51	23.8913	42	23.999	40	14.4247	19	18.8711	40	90.607	35	125.607	67	112.476	31	144.387	44	164.355	36	19.8129	127.486	-6.33213	-2.66269	1.25192e-09	5.90905e-08
hsa-miR-139-3p	3.75326	0.173575	0	0.281074	0	0.296284	0	0.369864	0	0.698929	1	1.27615	0	0.930419	0	8.92664	2	1.62232	0	2.25144	0	0.363945	3.0014	-6.26069	-2.64632	0.00142442	0.00545131
hsa-miR-1284	2.26139	0.173575	0	0.843222	1	0.296284	0	0.369864	0	0.232976	0	1.27615	0	2.79126	1	1.78533	0	1.62232	0	2.25144	0	0.383184	1.9453	-5.8176	-2.54043	9.86289e-05	0.000561433
hsa-miR-6842-5p	3.99857	0.867874	2	0.281074	0	0.296284	0	3.32877	4	1.16488	2	3.82846	1	0.930419	0	5.35599	1	8.11161	2	15.7601	3	1.18778	6.79731	-5.78102	-2.53132	0.00157826	0.00589417
hsa-miR-511-5p	1.30618	0.173575	0	0.843222	1	0.296284	0	0.369864	0	0.232976	0	3.82846	1	0.930419	0	1.78533	0	1.62232	0	2.25144	0	0.383184	2.0836	-5.74485	-2.52227	0.000960309	0.00390903
hsa-miR-193b-3p	1.72898	0.520725	1	0.281074	0	2.07399	3	0.369864	0	0.232976	0	1.27615	0	2.79126	1	1.78533	0	11.3562	3	2.25144	0	0.695726	3.89209	-5.73394	-2.51953	0.000949871	0.00390903
hsa-miR-6503-3p	1.48159	0.173575	0	0.281074	0	0.296284	0	0.369864	0	0.232976	0	1.27615	0	0.930419	0	1.78533	0	1.62232	0	2.25144	0	0.270755	1.57313	-5.72648	-2.51765	0.00118902	0.00467681
hsa-miR-3960	2.99162	0.173575	0	0.281074	0	2.07399	3	0.369864	0	0.232976	0	1.27615	0	4.65209	2	1.78533	0	1.62232	0	2.25144	0	0.626296	2.31747	-5.56189	-2.47558	0.00907122	0.0239643
hsa-miR-6747-3p	3.4311	1.21502	3	3.65396	6	0.888853	1	0.369864	0	1.16488	2	8.93308	3	4.65209	2	12.4973	3	8.11161	2	2.25144	0	1.45852	7.2891	-5.5434	-2.47077	0.000466854	0.0021053
hsa-miR-1273d	2.0884	2.60362	7	0.281074	0	0.888853	1	0.369864	0	0.698929	1	3.82846	1	4.65209	2	5.35599	1	1.62232	0	6.75433	1	0.968468	4.44264	-5.49888	-2.45914	0.000878394	0.00372397
hsa-miR-145-5p	3.43274	0.173575	0	0.843222	1	1.48142	2	2.58905	3	1.16488	2	1.27615	0	4.65209	2	5.35599	1	8.11161	2	11.2572	2	1.25043	6.13061	-5.49528	-2.45819	0.00443303	0.0135284
hsa-miR-3651	15.8803	2.25647	6	5.90256	10	11.5551	19	5.54796	7	8.62013	18	24.2469	9	30.7038	16	16.068	4	56.7812	17	47.2803	10	6.77644	35.016	-5.49146	-2.45719	0.000200442	0.00102096
hsa-miR-3187-3p	7.0323	1.90932	5	4.21611	7	7.4071	12	1.84932	2	2.09679	4	8.93308	3	19.5388	10	12.4973	3	24.3348	7	20.263	4	3.49573	17.1134	-5.46591	-2.45046	1.76607e-05	0.000154368
hsa-miR-320b	69.6933	31.7642	91	28.9506	51	29.3321	49	18.1233	24	29.588	63	162.072	63	164.684	88	119.617	33	150.876	46	150.847	33	27.5517	149.619	-5.45444	-2.44743	1.19273e-09	5.90905e-08
hsa-miR-3940-5p	2.49622	1.56217	4	0.843222	1	0.296284	0	1.10959	1	1.16488	2	6.38077	2	2.79126	1	12.4973	3	4.86696	1	2.25144	0	0.995231	5.75755	-5.32038	-2.41153	0.000595067	0.00261681
hsa-miR-7850-5p	1.55689	1.21502	3	1.40537	2	0.296284	0	0.369864	0	0.232976	0	1.27615	0	2.79126	1	5.35599	1	4.86696	1	2.25144	0	0.703904	3.30836	-5.29835	-2.40554	0.000655725	0.00284715
hsa-miR-6871-5p	1.21666	0.173575	0	1.40537	2	0.888853	1	0.369864	0	0.232976	0	1.27615	0	2.79126	1	5.35599	1	1.62232	0	2.25144	0	0.614128	2.65943	-5.27821	-2.40005	0.000437151	0.00198399
hsa-miR-708-5p	2.10203	0.520725	1	0.281074	0	0.888853	1	1.10959	1	0.232976	0	1.27615	0	2.79126	1	1.78533	0	8.11161	2	2.25144	0	0.606644	3.24316	-5.16034	-2.36747	0.00621276	0.0177052
hsa-miR-6774-5p	1.40019	0.173575	0	0.843222	1	1.48142	2	0.369864	0	0.232976	0	1.27615	0	0.930419	0	1.78533	0	4.86696	1	6.75433	1	0.620212	3.12264	-5.1562	-2.36631	0.00128082	0.00498255
hsa-miR-1303	1.60335	0.520725	1	0.281074	0	1.48142	2	0.369864	0	0.698929	1	1.27615	0	6.51293	3	5.35599	1	1.62232	0	2.25144	0	0.670403	3.40377	-4.97429	-2.31449	0.00166345	0.00610774
hsa-miR-7854-3p	1.7425	0.867874	2	0.281074	0	0.888853	1	0.369864	0	0.232976	0	1.27615	0	0.930419	0	5.35599	1	1.62232	0	6.75433	1	0.528128	3.18784	-4.97402	-2.31441	0.00149778	0.00570125
hsa-miR-145-3p	4.09762	1.21502	3	0.281074	0	0.888853	1	1.10959	1	0.698929	1	3.82846	1	2.79126	1	5.35599	1	1.62232	0	6.75433	1	0.838694	4.07047	-4.73087	-2.24211	0.0134867	0.0329873
hsa-miR-6511b-5p	1.67127	0.173575	0	1.96752	3	0.296284	0	0.369864	0	1.16488	2	1.27615	0	0.930419	0	8.92664	2	4.86696	1	2.25144	0	0.794425	3.65032	-4.73072	-2.24206	0.00311348	0.0103978
hsa-miR-99a-5p	191.455	29.3341	84	28.3885	50	86.8113	146	80.2605	108	137.223	294	486.215	190	257.726	138	191.03	53	225.503	69	299.442	66	72.4035	291.983	-4.70931	-2.23552	2.62019e-05	0.000197351
hsa-miR-1287-3p	1.23423	0.173575	0	0.843222	1	0.296284	0	0.369864	0	0.232976	0	1.27615	0	0.930419	0	1.78533	0	1.62232	0	2.25144	0	0.383184	1.57313	-4.62704	-2.21009	0.00100583	0.0040693
hsa-miR-3941	1.75893	0.173575	0	0.281074	0	0.296284	0	0.369864	0	0.698929	1	1.27615	0	0.930419	0	1.78533	0	1.62232	0	2.25144	0	0.363945	1.57313	-4.62409	-2.20917	0.000186898	0.000972968
hsa-miR-3065-3p	1.31016	0.173575	0	0.281074	0	0.296284	0	0.369864	0	0.698929	1	1.27615	0	0.930419	0	1.78533	0	1.62232	0	2.25144	0	0.363945	1.57313	-4.62214	-2.20856	0.000252349	0.00126712
hsa-miR-320a	2571.3	1028.08	2961	1617.58	2877	1177.14	1986	1108.48	1498	1137.16	2440	7099.25	2781	5099.62	2740	4875.73	1365	5423.42	1671	5189.57	1152	1213.69	5537.52	-4.60141	-2.20208	1.75183e-11	3.10073e-09
hsa-miR-486-3p	1.38689	0.173575	0	0.843222	1	1.48142	2	0.369864	0	0.232976	0	3.82846	1	0.930419	0	1.78533	0	1.62232	0	2.25144	0	0.620212	2.0836	-4.23236	-2.08146	0.0107264	0.0275448
hsa-miR-34a-3p	1.64315	0.173575	0	0.843222	1	1.48142	2	0.369864	0	1.16488	2	1.27615	0	2.79126	1	1.78533	0	1.62232	0	11.2572	2	0.806593	3.74645	-4.18085	-2.0638	0.00364901	0.0116374
hsa-miR-3653-5p	1.44207	0.520725	1	1.40537	2	0.296284	0	0.369864	0	0.232976	0	1.27615	0	2.79126	1	1.78533	0	1.62232	0	2.25144	0	0.565044	1.9453	-4.17867	-2.06304	0.003308	0.0108269
hsa-miR-3130-3p	1.35746	0.173575	0	0.281074	0	0.888853	1	0.369864	0	1.16488	2	1.27615	0	0.930419	0	5.35599	1	1.62232	0	2.25144	0	0.57565	2.28726	-4.1563	-2.0553	0.00946669	0.0247248
hsa-miR-6731-5p	2.71192	1.56217	4	0.281074	0	2.07399	3	1.10959	1	0.698929	1	6.38077	2	0.930419	0	5.35599	1	4.86696	1	6.75433	1	1.14515	4.85769	-4.09699	-2.03456	0.0030387	0.010278
hsa-miR-133a-3p	1.33606	0.867874	2	0.281074	0	0.296284	0	0.369864	0	0.232976	0	1.27615	0	0.930419	0	1.78533	0	1.62232	0	2.25144	0	0.409615	1.57313	-4.08806	-2.03142	0.002377	0.00845685
hsa-miR-3194-5p	2.00008	0.867874	2	2.52967	4	0.888853	1	0.369864	0	0.232976	0	1.27615	0	2.79126	1	1.78533	0	4.86696	1	6.75433	1	0.977847	3.49481	-4.06787	-2.02427	0.00579309	0.0168095
hsa-miR-6868-3p	1.55058	0.867874	2	0.281074	0	0.296284	0	0.369864	0	0.698929	1	1.27615	0	0.930419	0	1.78533	0	1.62232	0	6.75433	1	0.502805	2.47371	-4.02553	-2.00918	0.00874163	0.0232672
hsa-miR-4741	3.55847	3.64507	10	1.96752	3	1.48142	2	1.10959	1	2.09679	4	11.4854	4	8.37377	4	5.35599	1	8.11161	2	6.75433	1	2.06008	8.01622	-4.01897	-2.00683	0.000264099	0.00131678
hsa-let-7e-5p	41.3743	1.90932	5	12.6483	22	77.9227	131	15.9041	21	36.5773	78	21.6946	8	28.843	15	123.188	34	79.4937	24	200.378	44	28.9924	90.7195	-4.00583	-2.0021	0.00861989	0.023117
hsa-miR-3605-5p	1.99379	0.173575	0	0.843222	1	2.66656	4	3.32877	4	0.698929	1	3.82846	1	2.79126	1	5.35599	1	4.86696	1	2.25144	0	1.54221	3.81882	-3.94747	-1.98093	0.00678351	0.0191344
hsa-miR-129-5p	2.0167	0.520725	1	1.96752	3	1.48142	2	0.369864	0	1.16488	2	3.82846	1	2.79126	1	5.35599	1	4.86696	1	2.25144	0	1.10088	3.81882	-3.94618	-1.98046	0.00549756	0.0161505
hsa-miR-6766-3p	1.73816	0.520725	1	1.96752	3	0.296284	0	0.369864	0	0.232976	0	3.82846	1	0.930419	0	1.78533	0	1.62232	0	2.25144	0	0.677474	2.0836	-3.85296	-1.94597	0.00421361	0.0130272
hsa-miR-4796-3p	1.58223	0.173575	0	0.843222	1	0.888853	1	1.10959	1	0.232976	0	3.82846	1	0.930419	0	1.78533	0	1.62232	0	2.25144	0	0.649644	2.0836	-3.80409	-1.92755	0.00324278	0.0107285
hsa-miR-4632-5p	1.33469	0.173575	0	1.40537	2	0.296284	0	1.10959	1	1.16488	2	3.82846	1	0.930419	0	5.35599	1	1.62232	0	2.25144	0	0.829941	2.79773	-3.78508	-1.92032	0.00622682	0.0177052
hsa-miR-3064-5p	1.6141	0.867874	2	0.843222	1	0.296284	0	1.84932	2	0.232976	0	3.82846	1	0.930419	0	1.78533	0	4.86696	1	2.25144	0	0.817935	2.73252	-3.73225	-1.90004	0.00320516	0.0106538
hsa-miR-6769b-3p	1.51788	0.173575	0	0.843222	1	0.888853	1	0.369864	0	0.698929	1	3.82846	1	0.930419	0	1.78533	0	1.62232	0	2.25144	0	0.594889	2.0836	-3.73095	-1.89954	0.00304856	0.010278
hsa-miR-5000-3p	1.39167	0.173575	0	0.281074	0	0.296284	0	0.369864	0	2.09679	4	1.27615	0	0.930419	0	1.78533	0	1.62232	0	2.25144	0	0.643517	1.57313	-3.69732	-1.88648	0.00475405	0.0143841
hsa-miR-101-5p	1.46882	0.520725	1	0.843222	1	0.296284	0	0.369864	0	0.232976	0	1.27615	0	0.930419	0	1.78533	0	1.62232	0	2.25144	0	0.452614	1.57313	-3.67726	-1.87863	0.00537479	0.0158556
hsa-miR-643	1.56166	0.520725	1	0.281074	0	0.888853	1	0.369864	0	0.698929	1	1.27615	0	0.930419	0	5.35599	1	1.62232	0	2.25144	0	0.551889	2.28726	-3.62842	-1.85934	0.00160199	0.00593828
hsa-miR-3150a-5p	2.97717	0.867874	2	0.281074	0	3.25913	5	2.58905	3	1.63084	3	6.38077	2	4.65209	2	16.068	4	1.62232	0	2.25144	0	1.72559	6.19492	-3.60399	-1.8496	0.0145663	0.0347236
hsa-miR-4795-3p	1.30032	1.56217	4	0.281074	0	0.296284	0	0.369864	0	0.232976	0	1.27615	0	0.930419	0	1.78533	0	1.62232	0	2.25144	0	0.548474	1.57313	-3.59655	-1.84661	0.0112591	0.0285715
hsa-miR-6514-5p	2.72333	0.173575	0	2.52967	4	1.48142	2	2.58905	3	1.16488	2	6.38077	2	0.930419	0	5.35599	1	4.86696	1	6.75433	1	1.58772	4.85769	-3.57359	-1.83737	0.0177138	0.0407051
hsa-miR-3661	1.82396	0.173575	0	0.281074	0	0.296284	0	1.84932	2	1.63084	3	3.82846	1	0.930419	0	1.78533	0	1.62232	0	2.25144	0	0.846218	2.0836	-3.57278	-1.83705	0.0174038	0.0401364
hsa-miR-4777-3p	1.93865	0.867874	2	0.281074	0	0.888853	1	0.369864	0	0.698929	1	1.27615	0	0.930419	0	1.78533	0	8.11161	2	2.25144	0	0.621319	2.87099	-3.56752	-1.83492	0.00518321	0.015484
hsa-miR-6500-3p	1.54105	1.56217	4	0.281074	0	0.296284	0	0.369864	0	0.698929	1	3.82846	1	0.930419	0	1.78533	0	1.62232	0	2.25144	0	0.641665	2.0836	-3.55865	-1.83133	0.00749924	0.0207401
hsa-miR-1229-3p	1.21933	0.173575	0	0.843222	1	0.296284	0	1.84932	2	0.698929	1	1.27615	0	2.79126	1	1.78533	0	1.62232	0	2.25144	0	0.772266	1.9453	-3.4697	-1.79481	0.0094988	0.0247248
hsa-miR-199a-3p	35.2639	7.81087	22	12.6483	22	13.9254	23	12.2055	16	11.8818	25	37.0085	14	45.5905	24	41.0626	11	40.558	12	29.2688	6	11.6944	38.6977	-3.4369	-1.78111	0.000382616	0.00178219
hsa-miR-199b-3p	35.2639	7.81087	22	12.6483	22	13.9254	23	12.2055	16	11.8818	25	37.0085	14	45.5905	24	41.0626	11	40.558	12	29.2688	6	11.6944	38.6977	-3.4369	-1.78111	0.000382616	0.00178219
hsa-miR-5189-3p	1.23081	0.173575	0	1.40537	2	0.888853	1	0.369864	0	0.698929	1	3.82846	1	0.930419	0	1.78533	0	1.62232	0	2.25144	0	0.707318	2.0836	-3.37345	-1.75422	0.0183441	0.0417609
hsa-miR-6767-5p	1.06977	0.173575	0	1.96752	3	0.296284	0	0.369864	0	1.63084	3	1.27615	0	2.79126	1	1.78533	0	1.62232	0	2.25144	0	0.887615	1.9453	-3.33277	-1.73672	0.00935765	0.0246291
hsa-miR-146a-5p	19281.7	12103.9	34866	10861	19320	14805	24984	11109.6	15018	12678.8	27210	65406.8	25626	36759.9	19754	36954.5	10349	32496.7	10015	37939.1	8425	12311.7	41911.4	-3.32949	-1.7353	8.03263e-10	5.11769e-08
hsa-miR-335-5p	6.33447	3.99222	11	0.843222	1	1.48142	2	1.10959	1	1.16488	2	3.82846	1	4.65209	2	5.35599	1	4.86696	1	6.75433	1	1.71827	5.09157	-3.32236	-1.73221	0.00368841	0.0117103
hsa-miR-877-3p	3.42096	2.60362	7	1.96752	3	1.48142	2	1.84932	2	0.232976	0	3.82846	1	4.65209	2	19.6386	5	1.62232	0	2.25144	0	1.62697	6.39859	-3.32018	-1.73126	0.0125667	0.0313284
hsa-miR-4482-5p	1.87296	0.867874	2	1.40537	2	0.296284	0	0.369864	0	1.16488	2	1.27615	0	2.79126	1	1.78533	0	1.62232	0	6.75433	1	0.820855	2.84588	-3.31159	-1.72753	0.0124479	0.0311418
hsa-miR-6513-5p	1.61649	0.867874	2	0.281074	0	0.888853	1	0.369864	0	0.698929	1	1.27615	0	2.79126	1	1.78533	0	1.62232	0	2.25144	0	0.621319	1.9453	-3.31145	-1.72746	0.00408337	0.0126799
hsa-miR-6733-5p	1.30893	0.867874	2	0.843222	1	0.296284	0	0.369864	0	0.232976	0	1.27615	0	0.930419	0	1.78533	0	1.62232	0	2.25144	0	0.522044	1.57313	-3.29017	-1.71816	0.00812259	0.0221876
hsa-miR-6513-3p	3.10571	0.520725	1	0.281074	0	0.296284	0	0.369864	0	1.16488	2	1.27615	0	0.930419	0	1.78533	0	1.62232	0	2.25144	0	0.526566	1.57313	-3.28583	-1.71626	0.00434186	0.0133075
hsa-miR-548an	1.39943	1.56217	4	0.281074	0	0.888853	1	0.369864	0	1.16488	2	3.82846	1	2.79126	1	1.78533	0	1.62232	0	2.25144	0	0.853369	2.45576	-3.27211	-1.71022	0.0117186	0.0296312
hsa-miR-4787-3p	3.97791	1.21502	3	1.96752	3	2.07399	3	1.84932	2	1.16488	2	1.27615	0	12.0954	6	1.78533	0	11.3562	3	11.2572	2	1.65415	7.55408	-3.23682	-1.69458	0.00967426	0.0250893
hsa-miR-4482-3p	1.56623	0.173575	0	1.96752	3	0.888853	1	0.369864	0	1.16488	2	1.27615	0	4.65209	2	1.78533	0	1.62232	0	2.25144	0	0.912938	2.31747	-3.22445	-1.68905	0.0138675	0.0336239
hsa-miR-5090	2.24412	1.56217	4	0.843222	1	0.296284	0	1.10959	1	1.16488	2	3.82846	1	0.930419	0	1.78533	0	4.86696	1	6.75433	1	0.995231	3.6331	-3.17404	-1.66632	0.0107767	0.0275448
hsa-miR-4638-5p	1.45954	0.173575	0	0.281074	0	0.888853	1	1.10959	1	1.63084	3	1.27615	0	0.930419	0	1.78533	0	1.62232	0	6.75433	1	0.816786	2.47371	-3.16786	-1.66351	0.0200917	0.0451584
hsa-miR-1226-5p	1.90886	1.21502	3	0.843222	1	1.48142	2	0.369864	0	1.63084	3	3.82846	1	0.930419	0	8.92664	2	4.86696	1	2.25144	0	1.10807	4.16079	-3.1238	-1.6433	0.0078167	0.0214505
hsa-miR-6786-3p	1.48154	0.867874	2	0.281074	0	0.888853	1	1.84932	2	0.232976	0	1.27615	0	2.79126	1	1.78533	0	1.62232	0	2.25144	0	0.824019	1.9453	-3.07262	-1.61947	0.0170383	0.0396814
hsa-miR-4775	1.25109	1.21502	3	0.843222	1	0.296284	0	1.10959	1	0.232976	0	1.27615	0	0.930419	0	1.78533	0	4.86696	1	2.25144	0	0.73942	2.22206	-3.06809	-1.61734	0.0148052	0.0351747
hsa-miR-151a-3p	146.286	14.7539	42	31.7614	56	32.8875	55	44.7535	60	58.943	126	98.2639	38	129.328	69	87.4811	24	76.2491	23	105.818	23	36.6199	99.428	-3.06514	-1.61595	0.000306992	0.00150938
hsa-miR-374c-5p	1.87485	0.173575	0	0.281074	0	0.888853	1	1.10959	1	0.698929	1	1.27615	0	0.930419	0	1.78533	0	1.62232	0	2.25144	0	0.630404	1.57313	-3.04629	-1.60705	0.00747599	0.0207401
hsa-miR-6783-3p	1.14143	0.173575	0	1.40537	2	1.48142	2	0.369864	0	0.698929	1	1.27615	0	0.930419	0	1.78533	0	4.86696	1	2.25144	0	0.825832	2.22206	-3.03994	-1.60404	0.015544	0.036654
hsa-miR-342-5p	141.525	17.5311	50	16.0212	28	16.8882	28	15.9041	21	11.8818	25	72.7408	28	32.5647	17	37.4919	10	47.0473	14	56.2861	12	15.6453	49.2262	-3.00048	-1.58519	4.94585e-05	0.000324869
hsa-miR-1908-5p	11.3803	6.42227	18	4.21611	7	6.81454	11	6.28769	8	7.22227	15	42.1131	16	6.51293	3	19.6386	5	17.8455	5	20.263	4	6.19257	21.2746	-2.87482	-1.52347	0.00617721	0.0177052
hsa-miR-296-3p	31.7229	18.5725	53	26.1399	46	29.3321	49	24.0412	32	22.5987	48	47.2177	18	95.8331	51	62.4865	17	85.983	26	51.7832	11	24.1369	68.6607	-2.85384	-1.5129	3.97751e-05	0.000281608
hsa-miR-1292-5p	17.3273	4.68652	13	16.0212	28	8.59224	14	13.685	18	17.4732	37	29.3516	11	30.7038	16	26.7799	7	53.5366	16	15.7601	3	12.0916	31.2264	-2.79087	-1.48071	0.00107886	0.00433996
hsa-miR-4437	1.72485	1.21502	3	0.843222	1	0.888853	1	1.10959	1	1.16488	2	1.27615	0	2.79126	1	5.35599	1	1.62232	0	6.75433	1	1.04431	3.56001	-2.74435	-1.45647	0.0142654	0.0342369
hsa-miR-188-5p	3.01059	0.867874	2	2.52967	4	0.888853	1	4.80823	6	2.09679	4	8.93308	3	4.65209	2	5.35599	1	1.62232	0	6.75433	1	2.23828	5.46356	-2.70507	-1.43567	0.0179508	0.0409972
hsa-miR-598-5p	2.81839	0.520725	1	1.96752	3	2.07399	3	1.84932	2	1.63084	3	3.82846	1	0.930419	0	5.35599	1	4.86696	1	11.2572	2	1.60848	5.24781	-2.69633	-1.431	0.0194063	0.0437569
hsa-miR-766-5p	26.122	16.8368	48	16.5834	29	27.5544	46	10.7261	14	17.4732	37	59.9793	23	32.5647	17	69.6278	19	40.558	12	38.2745	8	17.8348	48.2009	-2.65546	-1.40896	0.000512093	0.0022947
hsa-let-7d-5p	6207.98	3532.77	10176	5255.8	9349	4375.23	7383	4106.6	5551	4334.99	9303	12816.4	5021	10399.3	5588	9849.66	2758	11325.4	3490	11390	2529	4321.08	11156.2	-2.60276	-1.38004	5.80454e-10	4.56624e-08
hsa-miR-23a-5p	21.818	7.81087	22	11.524	20	15.7031	26	9.2466	12	11.4158	24	59.9793	23	17.678	9	30.3506	8	14.6009	4	38.2745	8	11.1401	32.1766	-2.59984	-1.37842	0.0015412	0.00583512
hsa-miR-335-3p	18.308	12.3238	35	10.3997	18	6.22197	10	7.76714	10	4.42655	9	11.4854	4	38.1472	20	33.9212	9	17.8455	5	11.2572	2	8.22784	22.5313	-2.58284	-1.36896	0.00374936	0.0117648
hsa-miR-1180-3p	64.4279	18.5725	53	72.236	128	49.4795	83	34.3973	46	46.8283	100	42.1131	16	192.597	103	173.177	48	95.7169	29	74.2976	16	44.3027	115.58	-2.57351	-1.36374	0.00265181	0.00934071
hsa-miR-155-5p	67469.7	31631.4	91117	71897.3	127897	54732.3	92364	60853.3	82264	72573.3	155752	105437	41310	179691	96564	149919	41986	147831	45561	125736	27923	58337.5	141723	-2.51205	-1.32886	1.60887e-07	2.8477e-06
hsa-miR-92b-3p	196.856	103.971	299	159.931	284	182.215	307	178.644	241	184.75	396	177.386	69	507.078	272	487.395	136	517.52	159	398.505	88	161.902	417.577	-2.47921	-1.30988	0.000131411	0.000715687
hsa-miR-25-5p	38.9743	40.0958	115	21.0806	37	26.3693	44	18.1233	24	16.0754	34	126.339	49	32.5647	17	58.9158	16	34.0687	10	78.8005	17	24.3489	66.1378	-2.40357	-1.26518	0.00293572	0.010139
hsa-let-7b-5p	2751.86	1306.15	3762	1347.75	2397	1282.61	2164	1428.04	1930	974.075	2090	4016.06	1573	2513.06	1350	2629.79	736	3499.35	1078	2595.91	576	1267.73	3050.83	-2.3919	-1.25816	1.37913e-07	2.5286e-06
hsa-let-7a-5p	42062.4	22440.6	64642	26166.6	46547	19825.3	33456	21039	28441	20615.4	44243	68959.6	27018	51633.6	27747	43674.5	12231	49816.6	15353	47687.8	10590	22017.4	52354.4	-2.37123	-1.24564	1.92877e-09	7.18721e-08
hsa-miR-3934-5p	23.4548	19.2668	55	21.0806	37	16.2956	27	10.7261	14	23.0647	49	47.2177	18	53.0339	28	30.3506	8	40.558	12	38.2745	8	18.0867	41.8869	-2.35722	-1.23709	0.000367948	0.00174837
hsa-miR-942-5p	60.3218	69.2564	199	57.058	101	31.7024	53	36.6165	49	47.7602	102	105.921	41	106.998	57	98.1931	27	111.94	34	146.344	32	48.4787	113.879	-2.35381	-1.235	9.48659e-05	0.000546057
hsa-miR-92b-5p	3.84238	2.25647	6	3.65396	6	2.07399	3	4.0685	5	2.56274	5	16.59	6	4.65209	2	1.78533	0	11.3562	3	6.75433	1	2.92313	8.2276	-2.31278	-1.20963	0.0203599	0.0456166
hsa-miR-505-5p	16.8739	6.42227	18	6.4647	11	2.66656	4	7.76714	10	5.35846	11	21.6946	8	4.65209	2	19.6386	5	14.6009	4	11.2572	2	5.73583	14.3687	-2.26084	-1.17686	0.0169857	0.0396814
hsa-miR-2110	44.6389	11.9767	34	12.6483	22	15.1105	25	12.2055	16	15.6094	33	62.5316	24	25.1213	13	33.9212	9	11.3562	3	33.7716	7	13.5101	33.3404	-2.16908	-1.11708	0.00454593	0.0138134
hsa-miR-130a-3p	9.94772	4.68652	13	7.589	13	10.3699	17	6.28769	8	8.15418	17	14.0377	5	10.2346	5	12.4973	3	30.8241	9	15.7601	3	7.41747	16.6708	-2.14886	-1.10357	0.0172997	0.0400267
hsa-miR-664a-5p	30.7397	7.46372	21	7.589	13	9.18481	15	6.28769	8	6.75632	14	24.2469	9	13.9563	7	12.4973	3	14.6009	4	6.75433	1	7.45631	14.4111	-1.83633	-0.876826	0.021022	0.0468038
hsa-miR-629-5p	355.342	261.577	753	434.822	773	326.209	550	302.179	408	329.662	707	488.767	191	735.961	395	644.504	180	598.636	184	524.586	116	330.89	598.491	-1.83061	-0.872327	0.000631644	0.00276052
hsa-let-7d-3p	855.769	484.447	1395	964.365	1715	689.453	1163	820.728	1109	765.328	1642	863.957	338	1411.45	758	1483.61	415	1172.94	361	1708.84	379	744.864	1328.16	-1.78541	-0.836255	0.000544337	0.00240869
hsa-miR-200c-3p	303.15	151.184	435	99.7813	177	84.441	142	96.5345	130	126.972	272	230.984	90	173.988	93	212.454	59	167.099	51	200.378	44	111.783	196.981	-1.76411	-0.81894	0.000885755	0.00373282
hsa-miR-222-3p	2360.43	2040.37	5877	1449.5	2578	1103.07	1861	942.783	1274	1566.77	3362	3314.17	1298	2485.15	1335	1901.37	532	1766.71	544	2803.05	622	1420.5	2454.09	-1.72189	-0.78399	0.00296047	0.0101748
hsa-miR-378a-3p	3555.74	2068.84	5959	3976.35	7073	3580	6041	4366.98	5903	4305.64	9240	3064.05	1200	6986.51	3754	7232.37	2025	7516.21	2316	5495.77	1220	3659.56	6058.98	-1.65087	-0.72323	0.00622341	0.0177052
hsa-miR-3184-3p	2099.94	1472.09	4240	1765.43	3140	1469.87	2480	1591.52	2151	1633.86	3506	3048.73	1194	1839.44	988	2151.32	602	3194.35	984	2469.83	548	1586.55	2540.74	-1.56567	-0.646778	0.0008071	0.00344233
hsa-miR-423-5p	2099.94	1472.09	4240	1765.43	3140	1469.87	2480	1591.52	2151	1633.86	3506	3048.73	1194	1839.44	988	2151.32	602	3194.35	984	2469.83	548	1586.55	2540.74	-1.56567	-0.646778	0.0008071	0.00344233
hsa-miR-92a-3p	30896.7	31607.5	91048	36216.1	64424	33078.6	55822	31691.8	42842	32796.8	70386	33237.5	13022	55450.2	29798	57475.1	16096	55316.3	17048	44887	9968	33078.2	49273.2	-1.46308	-0.549009	0.00114535	0.00453021
hsa-miR-98-5p	3073.93	1978.93	5700	3464.8	6163	3732.29	6298	3657.58	4944	3422.66	7345	2767.98	1084	5337.81	2868	5168.53	1447	5390.97	1661	3870.23	859	3251.25	4507.1	-1.39826	-0.483631	0.0209016	0.0466824
hsa-miR-3184-5p	407.617	339.339	977	336.446	598	269.322	454	311.795	421	368.802	791	506.633	198	468.001	251	376.704	105	468.851	144	434.528	96	325.141	450.944	-1.39025	-0.475348	0.018507	0.0419967
hsa-miR-3529-3p	10359.4	9988.02	28771	8537.62	15187	6249.52	10546	6213.34	8399	9447.89	20276	9370.81	3671	13036.1	7005	11135.1	3118	10842	3341	10025.7	2226	8087.28	10881.9	-1.35526	-0.438566	0.00823825	0.0222628
hsa-miR-181b-5p	7787.11	3895.19	11220	3184.85	5665	3088.17	5211	3414.95	4616	4163.52	8935	4957.86	1942	4027.78	2164	3990.21	1117	5076.24	1564	5419.22	1203	3549.34	4694.26	-1.30966	-0.38919	0.0177654	0.0407051
hsa-let-7i-5p	37536.8	52334.4	150754	42092.2	74877	45062.2	76045	42565.8	57542	45976.7	98672	49643.7	19450	35691.8	19180	31152.2	8724	34982.1	10781	34773.5	7722	45606.3	37248.7	1.23473	0.304198	0.0225058	0.0499503
hsa-miR-425-5p	964.507	942.685	2715	1541.69	2742	1078.18	1819	1194.29	1614	1457.73	3128	820.568	321	944.375	507	726.629	203	871.186	268	956.863	212	1242.92	863.924	1.41411	0.499899	0.00776976	0.0214046
hsa-miR-769-5p	518.197	532.007	1532	687.226	1222	629.011	1061	572.179	773	693.571	1488	356.047	139	494.052	265	444.547	124	468.851	144	394.002	87	622.799	431.5	1.43848	0.524544	0.00553374	0.0161896
hsa-miR-339-5p	334.295	375.442	1081	362.867	645	346.356	584	288.864	390	323.138	693	238.641	93	255.865	137	226.737	63	209.279	64	213.887	47	339.333	228.882	1.47476	0.560485	0.0131221	0.0324841
hsa-miR-328-3p	212.115	203.256	585	280.231	498	211.843	357	231.905	313	257.905	553	105.921	41	172.127	92	148.182	41	98.9616	30	254.413	56	237.028	155.921	1.61967	0.695697	0.0145263	0.0347236
hsa-miR-19a-3p	435.298	503.888	1451	624.828	1111	570.347	962	561.083	758	629.735	1351	202.909	79	425.201	228	512.389	143	403.958	124	317.453	70	577.976	372.382	1.6201	0.696085	0.0042866	0.0131953
hsa-miR-148a-3p	7590.54	10411.2	29990	7929.38	14105	15797.6	26659	13696.4	18515	13272.9	28485	6698.54	2624	6353.83	3414	8546.37	2393	8625.88	2658	6441.38	1430	12221.5	7333.2	1.63351	0.707972	0.00333415	0.0108269
hsa-miR-363-3p	13015.2	20660.1	59513	11876.2	21126	16075.5	27128	14431	19508	21270.1	45648	10675	4182	7838.78	4212	10899.4	3052	9982.14	3076	12551.8	2787	16862.6	10389.4	1.63369	0.708136	0.0012014	0.00469939
hsa-miR-106a-5p	1163.77	2390.3	6885	1224.64	2178	1902.44	3210	1385.14	1872	2120.78	4551	1121.74	439	1082.08	581	1062.27	297	1010.71	311	1100.96	244	1804.66	1075.55	1.64254	0.715932	0.00711029	0.0199765
hsa-miR-330-5p	120.612	136.951	394	142.505	253	112.884	190	97.2742	131	157.725	338	93.1593	36	88.3898	47	58.9158	16	73.0044	22	74.2976	16	129.468	77.5534	1.654	0.725962	0.00522963	0.015502
hsa-miR-181a-5p	58216.9	19609.3	56486	15660	27857	14417.5	24330	16541.4	22361	20466.3	43923	12083.9	4734	9119.03	4900	8514.23	2384	10283.9	3169	12313.1	2734	17338.9	10462.8	1.67336	0.742748	0.00158177	0.00589417
hsa-miR-191-3p	31.725	53.6346	154	50.3123	89	45.3315	76	58.0686	78	42.6347	91	29.3516	11	26.9821	14	30.3506	8	30.8241	9	29.2688	6	49.9963	29.3554	1.69806	0.763884	0.0155831	0.036654
hsa-let-7g-5p	81422	72388.9	208523	67009.5	119202	61896.4	104454	63362.5	85656	73601.2	157958	50184.8	19662	47485.8	25518	31644.9	8862	36364.3	11207	32922.8	7311	67651.7	39720.5	1.70905	0.773194	8.70886e-06	8.56371e-05
hsa-miR-27a-3p	23424.5	22401.4	64529	17131.2	30474	17455.6	29457	15332	20726	19116.9	41027	10736.3	4206	11078.5	5953	10795.9	3023	9281.3	2860	11363	2523	18287.4	10651	1.71903	0.781592	5.08319e-05	0.000330174
hsa-miR-16-2-3p	503.401	777.442	2239	781.667	1390	822.781	1388	754.892	1020	670.273	1438	527.052	206	402.871	216	419.552	117	387.735	119	479.557	106	761.411	443.353	1.72583	0.787287	0.000137976	0.000745702
hsa-miR-93-5p	4404.2	7411.13	21348	7552.74	13435	8010.64	13518	6948.63	9393	7346.45	15766	3148.27	1233	5509.01	2960	4386.55	1228	4596.04	1416	3888.24	863	7453.92	4305.62	1.75033	0.807629	6.07558e-05	0.000377326
hsa-miR-548k	81.1722	90.0853	259	100.343	178	80.8856	136	94.3153	127	97.6171	209	59.9793	23	51.173	27	62.4865	17	47.0473	14	42.7774	9	92.6494	52.6927	1.75991	0.815504	0.00328598	0.0108208
hsa-miR-27b-3p	1871.5	1635.6	4711	2848.69	5067	2579.75	4353	2728.49	3688	2116.59	4542	973.706	381	2101.82	1129	1555.02	435	1422.78	438	785.753	174	2381.82	1367.81	1.76077	0.816206	0.00156544	0.00589417
hsa-let-7f-1-3p	78.9428	93.904	270	110.462	196	130.661	220	122.425	165	134.427	288	39.5608	15	88.3898	47	55.3452	15	85.983	26	74.2976	16	118.376	68.7153	1.76777	0.821931	0.00301526	0.010278
hsa-miR-1287-5p	59.1895	49.4688	142	43.0043	76	35.8504	60	50.6713	68	47.7602	102	31.9039	12	45.5905	24	16.068	4	14.6009	4	24.7659	5	45.351	26.5858	1.78633	0.836996	0.013917	0.0336288
hsa-miR-1271-5p	72.9805	93.904	270	83.479	148	63.1085	106	72.8632	98	95.7533	205	49.77	19	45.5905	24	33.9212	9	47.0473	14	51.7832	11	81.8216	45.6225	1.80091	0.848722	0.00304562	0.010278
hsa-miR-210-3p	820.545	1368.64	3942	1653	2940	1412.39	2383	1576.73	2131	1850.07	3970	733.789	287	979.731	526	848.031	237	945.813	291	830.782	184	1572.16	867.629	1.80285	0.85028	2.45375e-05	0.000193406
hsa-miR-576-5p	128.777	101.541	292	112.711	200	108.736	183	109.11	147	148.406	318	29.3516	11	97.694	52	51.7745	14	79.4937	24	87.8063	19	116.101	69.224	1.80789	0.854307	0.0127502	0.0316741
hsa-miR-152-3p	325.748	258.453	744	284.728	506	268.73	453	241.521	326	360.415	773	179.938	70	211.205	113	108.905	30	131.408	40	141.841	31	282.769	154.659	1.82077	0.864552	0.00113699	0.00452239
hsa-miR-2277-5p	18.1586	23.0855	66	25.5777	45	21.0362	35	19.6028	26	25.8604	55	6.38077	2	12.0954	6	12.4973	3	14.6009	4	24.7659	5	23.0325	14.0681	1.8329	0.874132	0.0157924	0.0370231
hsa-miR-26a-5p	83012.4	44263.8	127506	55990.8	99601	56747.6	95765	52338.3	70753	55189.6	118444	23569.3	9234	26955.2	14485	29438.3	8244	29699.8	9153	34913.1	7753	52906	28915.1	1.84788	0.885875	1.52752e-06	1.83303e-05
hsa-miR-671-3p	72.5942	89.0439	256	79.544	141	61.9234	104	74.3426	100	78.0471	167	31.9039	12	38.1472	20	51.7745	14	37.3134	11	56.2861	12	76.5802	43.085	1.85203	0.889109	0.00883373	0.0234243
hsa-miR-140-5p	1903.07	1528.67	4403	1509.09	2684	1577.12	2661	1340.02	1811	1354.29	2906	562.784	220	789.925	424	965.863	270	822.517	253	835.285	185	1461.84	795.275	1.87454	0.906535	3.64846e-05	0.0002663
hsa-let-7f-2-3p	500.767	588.939	1696	831.698	1479	749.303	1264	737.139	996	680.99	1461	238.641	93	421.48	226	415.982	116	533.744	164	321.956	71	717.614	386.36	1.90214	0.927626	0.00168907	0.00616425
hsa-miR-20b-5p	1780.28	4001.77	11527	2151.06	3826	3101.21	5233	2282.43	3085	3338.32	7164	1461.2	572	1487.74	799	1733.55	485	1481.18	456	1519.72	337	2974.96	1536.68	1.911	0.934331	0.000413934	0.00191215
hsa-miR-106b-3p	1478.14	2923.52	8421	2601.34	4627	2128.8	3592	1942.16	2625	2370.07	5086	1463.75	573	1515.65	814	1008.71	282	1156.71	356	1069.44	237	2393.18	1242.85	1.92496	0.944828	3.94409e-05	0.000281608
hsa-miR-132-5p	90.3158	61.2719	176	105.403	187	81.4782	137	65.4659	88	133.03	285	47.2177	18	40.008	21	30.3506	8	53.5366	16	56.2861	12	89.3297	45.4798	1.9337	0.95136	0.0132839	0.0327701
hsa-miR-103a-3p	5192.6	6716.13	19346	8018.76	14264	7546.06	12734	7356.22	9944	7909.32	16974	4115.6	1612	5430.85	2918	3351.06	938	3674.56	1132	2879.59	639	7509.3	3890.33	1.93818	0.954704	1.01762e-05	9.35677e-05
hsa-miR-103b	5192.6	6716.13	19346	8018.76	14264	7546.06	12734	7356.22	9944	7909.32	16974	4115.6	1612	5430.85	2918	3351.06	938	3674.56	1132	2879.59	639	7509.3	3890.33	1.93818	0.954704	1.01762e-05	9.35677e-05
hsa-miR-6842-3p	39.0808	39.4015	113	54.8094	97	43.5538	73	52.8905	71	80.8428	173	24.2469	9	23.2605	12	23.2093	6	53.5366	16	20.263	4	54.2996	28.9033	1.94576	0.960332	0.00744061	0.02074
hsa-miR-324-5p	24.6748	21.6969	62	28.3885	50	32.8875	55	29.959	40	41.2368	88	8.93308	3	12.0954	6	23.2093	6	24.3348	7	15.7601	3	30.8337	16.8665	1.94804	0.962022	0.0140573	0.0338523
hsa-miR-30c-1-3p	37.7501	61.6191	177	68.301	121	55.9977	94	63.9864	86	63.6026	136	24.2469	9	34.4255	18	33.9212	9	56.7812	17	20.263	4	62.7014	33.9276	1.94957	0.963156	0.00266877	0.00935392
hsa-miR-21-5p	123935	186708	537832	208943	371687	191946	323922	179699	242925	222632	477798	114470	44849	114221	61381	94749.2	26535	91474.6	28192	88452.4	19643	197986	100673	1.9577	0.969163	4.59577e-09	1.35575e-07
hsa-miR-30e-3p	1325.71	1218.32	3509	1531.01	2723	1399.35	2361	1459.85	1973	1570.96	3371	585.755	229	884.828	475	623.08	174	783.581	241	767.742	170	1435.9	728.997	1.97129	0.979138	1.01185e-05	9.35677e-05
hsa-miR-197-3p	783.962	652.121	1878	724.89	1289	462.5	780	595.111	804	852.461	1829	200.356	78	404.732	217	344.568	96	329.331	101	407.511	90	657.416	337.3	1.98434	0.988657	0.000319764	0.00156133
hsa-miR-29b-3p	602.937	368.499	1061	372.985	663	293.618	495	299.22	404	385.576	827	133.996	52	216.788	116	208.883	58	167.099	51	146.344	32	343.98	174.622	1.98678	0.990434	0.000227589	0.00115095
hsa-miR-148b-3p	1905.07	1668.23	4805	1726.64	3071	1817.7	3067	1675.11	2264	1928.81	4139	815.463	319	981.592	527	801.612	224	900.388	277	862.302	191	1763.3	872.272	2.01598	1.01148	1.58472e-06	1.86997e-05
hsa-miR-651-5p	84.6473	82.1009	236	82.3547	146	124.143	209	61.0275	82	96.2193	206	31.9039	12	69.7814	37	62.4865	17	24.3348	7	38.2745	8	89.1691	45.3562	2.03084	1.02208	0.00375542	0.0117648
hsa-miR-4677-3p	11.1914	11.6295	33	14.3348	25	10.3699	17	13.685	18	12.3478	26	6.38077	2	2.79126	1	5.35599	1	14.6009	4	6.75433	1	12.4734	7.17665	2.03088	1.02211	0.013368	0.032863
hsa-miR-148a-5p	42.7855	66.132	190	53.123	94	105.181	177	96.5345	130	65.0004	139	37.0085	14	34.4255	18	41.0626	11	47.0473	14	24.7659	5	77.1942	36.8619	2.03973	1.02838	0.00512384	0.0153715
hsa-miR-3613-5p	534.059	741.685	2136	646.189	1149	850.039	1434	677.221	915	749.485	1608	312.658	122	347.046	186	426.693	119	410.447	126	308.448	68	732.924	361.058	2.04159	1.02969	4.24473e-05	0.000288968
hsa-miR-296-5p	21.3774	21.3497	61	48.6258	86	45.3315	76	31.4384	42	25.8604	55	8.93308	3	32.5647	17	23.2093	6	11.3562	3	11.2572	2	34.5212	17.4641	2.04247	1.03031	0.0189003	0.0427521
hsa-miR-33b-3p	5.55609	10.9352	31	5.34041	9	6.22197	10	9.2466	12	10.4839	22	6.38077	2	2.79126	1	5.35599	1	4.86696	1	2.25144	0	8.44563	4.32928	2.04901	1.03493	0.0172756	0.0400267
hsa-miR-941	560.272	820.488	2363	301.03	535	703.675	1187	873.249	1180	1077.05	2311	483.663	189	159.102	85	337.427	94	381.245	117	515.58	114	755.098	375.403	2.05928	1.04214	0.00870326	0.0232525
hsa-miR-93-3p	22.4205	35.2357	101	34.01	60	51.2572	86	33.6576	45	37.9752	81	6.38077	2	26.9821	14	30.3506	8	34.0687	10	11.2572	2	38.4271	21.8079	2.0736	1.05214	0.0122021	0.0306351
hsa-miR-19b-3p	1731.22	1930.33	5560	2179.17	3876	2093.25	3532	2132.27	2882	2451.15	5260	539.814	211	1201.17	645	1397.91	391	1296.23	399	1037.91	230	2157.23	1094.61	2.07379	1.05227	0.000112003	0.000619517
hsa-miR-331-3p	14.4332	14.7539	42	17.1455	30	23.4065	39	18.1233	24	22.5987	48	3.82846	1	10.2346	5	19.6386	5	11.3562	3	6.75433	1	19.2056	10.3625	2.09807	1.06906	0.008148	0.0221876
hsa-miR-30e-5p	1851.63	1021.14	2941	917.145	1631	739.822	1248	713.467	964	896.726	1924	391.78	153	423.34	227	405.27	113	407.203	125	380.494	84	857.66	401.617	2.12582	1.08802	8.38673e-06	8.3631e-05
hsa-miR-192-5p	1766.27	797.924	2298	1093.1	1944	2267.46	3826	1239.41	1675	1498.74	3216	417.303	163	572.207	307	919.444	257	611.615	188	619.147	137	1379.33	627.943	2.1261	1.08821	0.000379055	0.00178219
hsa-miR-25-3p	7884.21	14201	40907	11532.8	20515	10523.1	17758	10645.1	14390	12409.5	26632	5812.89	2277	6498.97	3492	4368.7	1223	5854.96	1804	5153.55	1144	11862.3	5537.81	2.14541	1.10125	7.63495e-07	9.82826e-06
hsa-miR-429	24.2561	14.4067	41	30.0749	53	26.3693	44	46.9727	63	19.803	42	6.38077	2	12.0954	6	8.92664	2	24.3348	7	11.2572	2	27.5253	12.599	2.16649	1.11536	0.0109616	0.0279166
hsa-miR-744-3p	12.8237	16.1425	46	30.6371	54	23.999	40	18.1233	24	19.803	42	8.93308	3	10.2346	5	16.068	4	8.11161	2	6.75433	1	21.741	10.0203	2.18327	1.12649	0.00248273	0.00878888
hsa-miR-362-5p	32.5719	37.3186	107	33.4478	59	64.2937	108	44.0138	59	40.7709	87	14.0377	5	26.9821	14	26.7799	7	14.6009	4	15.7601	3	43.969	19.6322	2.23037	1.15728	0.00523303	0.015502
hsa-miR-766-3p	151.064	140.075	403	233.573	415	316.728	534	238.562	322	283.532	608	29.3516	11	136.772	73	133.9	37	157.365	48	155.35	34	242.494	122.547	2.24414	1.16616	0.00332036	0.0108269
hsa-miR-27a-5p	858.02	580.261	1671	803.591	1429	927.666	1565	1134.37	1533	980.598	2104	751.655	294	378.68	203	223.166	62	274.172	84	412.014	91	885.298	407.938	2.25949	1.176	0.003349	0.0108269
hsa-miR-450b-5p	47.6079	79.6709	229	85.1654	151	103.996	175	69.9043	94	95.7533	205	29.3516	11	28.843	15	62.4865	17	34.0687	10	51.7832	11	86.8979	41.3066	2.28084	1.18956	0.0137634	0.0334862
hsa-miR-16-5p	3313.51	4581.16	13196	3152.25	5607	3599.56	6074	3019.2	4081	4052.16	8696	1803.21	706	1664.52	894	1319.36	369	1555.81	479	1695.34	376	3680.86	1607.65	2.28714	1.19354	1.62649e-06	1.88779e-05
hsa-miR-17-3p	51.7866	79.3237	228	96.9706	172	86.8113	146	79.5207	107	81.7747	175	21.6946	8	26.9821	14	76.7691	21	34.0687	10	56.2861	12	84.8802	43.1601	2.28923	1.19486	0.00054104	0.00240869
hsa-miR-641	14.8089	21.0026	60	19.9563	35	17.4808	29	20.3425	27	20.7349	44	3.82846	1	13.9563	7	8.92664	2	14.6009	4	6.75433	1	19.9034	9.61332	2.29082	1.19586	0.0085082	0.0229042
hsa-miR-628-5p	17.1013	14.7539	42	16.5834	29	17.4808	29	11.4658	15	19.337	41	3.82846	1	15.8171	8	1.78533	0	8.11161	2	15.7601	3	15.9242	9.06052	2.32023	1.21427	0.0135118	0.0329873
hsa-miR-548e-3p	43.375	55.0232	158	45.8151	81	45.3315	76	44.7535	60	38.4411	82	11.4854	4	28.843	15	33.9212	9	21.0902	6	11.2572	2	45.8729	21.3194	2.33346	1.22247	0.00113635	0.00452239
hsa-miR-624-5p	6.45058	10.2409	29	7.02685	12	7.99967	13	8.50687	11	8.62013	18	6.38077	2	4.65209	2	5.35599	1	1.62232	0	2.25144	0	8.47889	4.05252	2.3345	1.22312	0.0118163	0.0297721
hsa-miR-18b-5p	15.9487	28.987	83	17.7077	31	36.443	61	23.3014	31	30.9859	66	14.0377	5	8.37377	4	19.6386	5	8.11161	2	11.2572	2	27.485	12.2838	2.33458	1.22316	0.00609072	0.0176009
hsa-miR-34a-5p	62.2117	65.0906	187	141.38	251	108.736	183	174.206	235	124.176	266	19.1423	7	88.3898	47	73.1985	20	95.7169	29	20.263	4	122.718	59.3421	2.33807	1.22532	0.00978332	0.0252795
hsa-miR-185-3p	49.824	84.1838	242	65.4903	116	86.2187	145	79.5207	107	72.9216	156	39.5608	15	25.1213	13	26.7799	7	34.0687	10	47.2803	10	77.667	34.5622	2.34224	1.22789	8.23943e-05	0.000482109
hsa-miR-3912-3p	16.585	13.7124	39	17.1455	30	14.5179	24	9.2466	12	18.4051	39	6.38077	2	4.65209	2	8.92664	2	4.86696	1	6.75433	1	14.6055	6.31616	2.36614	1.24254	0.0033688	0.0108414
hsa-miR-548ay-3p	4.32803	5.03367	14	3.09181	5	5.03683	8	7.02741	9	3.49465	7	1.27615	0	2.79126	1	1.78533	0	1.62232	0	2.25144	0	4.73688	1.9453	2.38942	1.25666	0.00943967	0.0247248
hsa-miR-1278	58.3687	82.4481	237	93.0355	165	56.5903	95	87.6577	118	114.857	246	42.1131	16	28.843	15	33.9212	9	37.3134	11	38.2745	8	86.9178	36.093	2.39354	1.25915	0.000155306	0.000833007
hsa-miR-361-3p	1457.12	1427.65	4112	1036.88	1844	900.408	1519	694.974	939	994.576	2134	800.149	313	454.975	244	262.443	73	319.597	98	344.471	76	1010.9	436.327	2.42964	1.28075	5.57976e-05	0.000355898
hsa-miR-194-3p	7.86567	5.03367	14	5.34041	9	7.99967	13	7.02741	9	4.42655	9	1.27615	0	2.79126	1	5.35599	1	1.62232	0	2.25144	0	5.96554	2.65943	2.46045	1.29892	0.00823848	0.0222628
hsa-miR-30c-5p	2748.73	3033.91	8739	3947.12	7021	3283.13	5540	3739.69	5055	4160.73	8929	991.572	388	1904.57	1023	1394.34	390	1744	537	1335.11	296	3632.92	1473.92	2.48949	1.31585	2.34526e-06	2.63562e-05
hsa-miR-3611	4.92277	5.38082	15	6.4647	11	4.44426	7	2.58905	3	5.35846	11	1.27615	0	2.79126	1	1.78533	0	1.62232	0	2.25144	0	4.84746	1.9453	2.50491	1.32476	0.0152502	0.0361107
hsa-miR-7705	4.80973	8.50517	24	8.15115	14	4.44426	7	7.02741	9	9.08608	19	3.82846	1	6.51293	3	1.78533	0	1.62232	0	2.25144	0	7.44281	3.2001	2.57104	1.36235	0.00487925	0.0147
hsa-miR-340-5p	1401.32	668.784	1926	833.385	1482	1146.32	1934	1035.99	1400	1190.28	2554	251.403	98	389.845	209	458.829	128	410.447	126	362.482	80	974.951	374.601	2.58284	1.36896	6.92234e-06	7.10292e-05
hsa-miR-210-5p	21.151	41.4844	119	46.9394	83	25.7767	43	38.8357	52	69.66	149	11.4854	4	17.678	9	12.4973	3	24.3348	7	20.263	4	44.5392	17.2517	2.59166	1.37388	0.00222654	0.00800199
hsa-miR-30d-3p	36.2029	36.2771	104	30.0749	53	28.7396	48	31.4384	42	31.9178	68	11.4854	4	12.0954	6	12.4973	3	8.11161	2	20.263	4	31.6896	12.8905	2.59716	1.37693	0.000177902	0.000932999
hsa-miR-3158-3p	12.9674	15.101	43	19.3941	34	13.9254	23	27.7398	37	29.1221	62	16.59	6	8.37377	4	16.068	4	1.62232	0	6.75433	1	21.0565	9.88168	2.59841	1.37763	0.0107666	0.0275448
hsa-miR-23b-5p	3.75714	6.42227	18	5.34041	9	6.81454	11	6.28769	8	3.49465	7	1.27615	0	4.65209	2	1.78533	0	1.62232	0	2.25144	0	5.67191	2.31747	2.61819	1.38857	0.0040519	0.0126376
hsa-miR-598-3p	115.121	92.1682	265	106.527	189	114.069	192	98.0139	132	99.4809	213	42.1131	16	38.1472	20	37.4919	10	37.3134	11	38.2745	8	102.052	38.668	2.62017	1.38966	1.96401e-05	0.000160136
hsa-miR-342-3p	2249.64	1147.85	3306	1255	2232	1076.4	1816	986.427	1333	1232.21	2644	465.797	182	477.305	256	337.427	94	433.16	133	403.008	89	1139.58	423.339	2.68598	1.42545	2.29366e-05	0.000184536
hsa-miR-664a-3p	73.3529	33.4999	96	39.6314	70	31.7024	53	38.096	51	59.8749	128	19.1423	7	19.5388	10	5.35599	1	14.6009	4	20.263	4	40.5609	15.7802	2.71977	1.44349	0.00279992	0.00973164
hsa-let-7i-3p	110.6	141.116	406	101.468	180	111.107	187	76.5618	103	102.277	219	49.77	19	41.8688	22	62.4865	17	14.6009	4	42.7774	9	106.506	42.3007	2.7521	1.46053	0.00010618	0.000591931
hsa-miR-155-3p	2.85031	2.95077	8	8.15115	14	5.03683	8	6.28769	8	5.82441	12	3.82846	1	0.930419	0	1.78533	0	1.62232	0	2.25144	0	5.65017	2.0836	2.80624	1.48864	0.00644715	0.0182583
hsa-miR-424-5p	42.0263	81.0595	233	80.6683	143	118.217	199	60.2878	81	87.8321	188	21.6946	8	38.1472	20	41.0626	11	21.0902	6	29.2688	6	85.613	30.2527	2.87108	1.52159	0.00166496	0.00610774
hsa-miR-548f-5p	63.6967	107.096	308	81.2304	144	52.4423	88	84.6988	114	90.1619	193	31.9039	12	28.843	15	23.2093	6	24.3348	7	33.7716	7	83.1258	28.4125	2.90099	1.53654	0.00015707	0.000836129
hsa-miR-548w	7.21894	10.2409	29	9.83759	17	7.99967	13	5.54796	7	10.018	21	6.38077	2	4.65209	2	1.78533	0	1.62232	0	2.25144	0	8.72883	3.33839	2.95737	1.56431	0.000945729	0.00390903
hsa-miR-107	94.9212	154.655	445	170.05	302	189.918	320	177.905	240	169.374	363	52.3224	20	75.3639	40	51.7745	14	73.0044	22	38.2745	8	172.38	58.148	2.96072	1.56595	2.86629e-06	3.02886e-05
hsa-miR-548aa	3.418	5.03367	14	5.90256	10	5.6294	9	4.80823	6	6.29036	13	3.82846	1	0.930419	0	1.78533	0	1.62232	0	2.25144	0	5.53284	2.0836	2.96366	1.56738	0.00133485	0.00513626
hsa-miR-548t-3p	3.418	5.03367	14	5.90256	10	5.6294	9	4.80823	6	6.29036	13	3.82846	1	0.930419	0	1.78533	0	1.62232	0	2.25144	0	5.53284	2.0836	2.96366	1.56738	0.00133485	0.00513626
hsa-miR-15a-5p	147.128	199.785	575	107.089	190	133.032	224	96.5345	130	122.779	263	42.1131	16	60.4772	32	44.6332	12	40.558	12	29.2688	6	131.844	43.4101	2.96952	1.57023	4.76809e-05	0.000318472
hsa-let-7a-3p	142.389	128.272	369	91.9112	163	84.441	142	74.3426	100	86.9002	186	37.0085	14	40.008	21	19.6386	5	17.8455	5	42.7774	9	93.1734	31.4556	3.0928	1.62891	1.78858e-05	0.000154428
hsa-miR-548aq-3p	16.7616	24.1269	69	19.3941	34	19.851	33	21.822	29	34.7135	74	3.82846	1	8.37377	4	5.35599	1	8.11161	2	20.263	4	23.9815	9.18656	3.09677	1.63076	0.000942765	0.00390903
hsa-miR-652-5p	3.09993	3.99222	11	7.589	13	2.66656	4	11.4658	15	8.62013	18	1.27615	0	2.79126	1	1.78533	0	1.62232	0	2.25144	0	6.86674	1.9453	3.13282	1.64746	0.00306998	0.0103012
hsa-miR-194-5p	290.359	161.251	464	209.4	372	374.207	631	185.302	250	265.826	570	62.5316	24	92.1114	49	98.1931	27	66.5152	20	42.7774	9	239.197	72.4257	3.19304	1.67493	1.63587e-05	0.000146607
hsa-miR-3667-3p	3.31875	4.68652	13	3.65396	6	3.85169	6	3.32877	4	11.4158	24	1.27615	0	0.930419	0	1.78533	0	1.62232	0	2.25144	0	5.38736	1.57313	3.24456	1.69802	0.00372592	0.0117648
hsa-miR-150-5p	16305.4	4220.82	12158	2802.59	4985	4663.81	7870	4585.2	6198	4054.96	8702	1198.31	469	940.653	505	1040.85	291	1344.9	414	1753.87	389	4065.48	1255.72	3.2984	1.72177	1.91151e-07	3.23936e-06
hsa-miR-548ar-3p	7.01064	7.81087	22	8.7133	15	7.99967	13	8.50687	11	16.0754	34	3.82846	1	6.51293	3	1.78533	0	1.62232	0	2.25144	0	9.82122	3.2001	3.31347	1.72834	0.00197966	0.00715103
hsa-miR-150-3p	79.3557	118.552	341	67.7389	120	80.293	135	105.411	142	100.879	216	75.2931	29	10.2346	5	16.068	4	37.3134	11	33.7716	7	94.5747	34.5361	3.49923	1.80704	8.17482e-05	0.000482109
hsa-miR-548u	15.7059	32.1113	92	18.832	33	27.5544	46	29.2192	39	37.0433	79	6.38077	2	6.51293	3	8.92664	2	14.6009	4	6.75433	1	28.952	8.63511	3.50015	1.80742	6.22962e-05	0.000380222
hsa-miR-301a-5p	49.321	75.5051	217	87.9762	156	123.551	208	104.671	141	105.072	225	14.0377	5	38.1472	20	16.068	4	40.558	12	47.2803	10	99.3551	31.2182	3.51279	1.81262	9.12595e-06	8.85092e-05
hsa-miR-142-3p	21304.8	22477.8	64749	23095.6	41084	27789.4	46896	22921.6	30986	27179.3	58330	4478.03	1754	7786.67	4184	8339.27	2335	7123.61	2195	7787.74	1729	24692.7	7103.06	3.55014	1.82788	4.24442e-10	3.75631e-08
hsa-miR-532-3p	14.9995	11.6295	33	16.0212	28	21.0362	35	11.4658	15	13.2797	28	1.27615	0	10.2346	5	19.6386	5	1.62232	0	2.25144	0	14.6865	7.00463	3.55445	1.82963	0.00280403	0.00973164
hsa-miR-548j-3p	5.38204	7.81087	22	3.65396	6	6.81454	11	10.7261	14	6.75632	14	1.27615	0	2.79126	1	1.78533	0	1.62232	0	2.25144	0	7.15235	1.9453	3.56899	1.83552	0.000659509	0.00284715
hsa-miR-26b-3p	68.172	74.4636	214	66.0524	117	48.2943	81	49.1919	66	40.7709	87	16.59	6	17.678	9	19.6386	5	17.8455	5	6.75433	1	55.7546	15.7013	3.64306	1.86515	2.55459e-05	0.000194479
hsa-miR-301a-3p	10.2147	14.4067	41	16.0212	28	21.6287	36	27.0001	36	25.3944	54	1.27615	0	8.37377	4	12.4973	3	4.86696	1	6.75433	1	20.8902	6.7537	3.76623	1.91312	0.00035456	0.00169628
hsa-miR-542-3p	16.4825	38.7072	111	32.3235	57	31.7024	53	34.3973	46	30.9859	66	3.82846	1	8.37377	4	12.4973	3	21.0902	6	6.75433	1	33.6233	10.5088	3.80623	1.92836	0.00360996	0.0115649
hsa-miR-7-1-3p	57.9477	79.3237	228	75.6089	134	58.368	98	57.3289	77	90.1619	193	16.59	6	30.7038	16	12.4973	3	11.3562	3	29.2688	6	72.1583	20.0832	3.83134	1.93785	1.95886e-05	0.000160136
hsa-miR-195-5p	24.5617	61.2719	176	33.4478	59	45.3315	76	41.7946	56	38.9071	83	26.7993	10	4.65209	2	12.4973	3	4.86696	1	29.2688	6	44.1506	15.6169	3.8528	1.94591	0.000159141	0.000840832
hsa-miR-374a-5p	313.408	331.702	955	316.208	562	365.911	617	291.083	393	349.232	749	49.77	19	105.137	56	91.0517	25	73.0044	22	114.824	25	330.827	86.7574	3.99674	1.99882	1.9101e-08	4.50784e-07
hsa-miR-128-1-5p	6.10407	17.8782	51	9.27544	16	9.77738	16	12.2055	16	10.4839	22	3.82846	1	2.79126	1	1.78533	0	4.86696	1	2.25144	0	11.9241	3.10469	4.0141	2.00508	8.06532e-05	0.000482109
hsa-miR-16-1-3p	4.18891	11.6295	33	5.90256	10	9.18481	15	7.76714	10	4.42655	9	1.27615	0	0.930419	0	1.78533	0	4.86696	1	2.25144	0	7.78211	2.22206	4.02244	2.00807	0.000270184	0.00133769
hsa-miR-590-3p	149.253	132.09	380	157.683	280	137.772	232	110.589	149	173.567	372	29.3516	11	49.3122	26	44.6332	12	34.0687	10	20.263	4	142.34	35.5257	4.05181	2.01857	4.04887e-07	5.62079e-06
hsa-miR-1307-5p	198.802	278.24	801	242.005	430	274.063	462	237.822	321	286.328	614	42.1131	16	62.3381	33	108.905	30	76.2491	23	56.2861	12	263.692	69.1783	4.05907	2.02115	2.31318e-07	3.48453e-06
hsa-miR-101-3p	3267.84	994.063	2863	1305.03	2321	1135.06	1915	1163.22	1572	1254.11	2691	205.461	80	339.603	182	387.416	108	248.215	76	254.413	56	1170.3	287.022	4.14186	2.05028	2.20468e-09	7.79101e-08
hsa-miR-106b-5p	369.971	817.711	2355	618.082	1099	567.977	958	514.481	695	653.499	1402	144.206	56	173.988	93	137.47	38	131.408	40	146.344	32	634.35	146.683	4.28781	2.10024	9.96544e-09	2.61316e-07
hsa-miR-29c-5p	39.4127	21.3497	61	30.0749	53	26.9619	45	28.4795	38	31.4518	67	8.93308	3	10.2346	5	8.92664	2	1.62232	0	6.75433	1	27.6636	7.2942	4.32343	2.11218	4.15179e-05	0.000285385
hsa-miR-124-3p	88.2033	310.178	893	86.2897	153	220.732	372	119.466	161	332.923	714	82.9501	32	25.1213	13	33.9212	9	34.0687	10	74.2976	16	213.918	50.0718	4.40101	2.13783	5.98412e-05	0.000374934
hsa-miR-454-3p	121.989	214.365	617	189.163	336	157.919	266	137.219	185	199.661	428	34.4562	13	58.6164	31	26.7799	7	50.292	15	33.7716	7	179.666	40.7832	4.44435	2.15197	5.134e-07	6.85824e-06
hsa-miR-33a-5p	43.8679	75.8522	218	70.5496	125	84.441	142	62.507	84	65.4664	140	6.38077	2	13.9563	7	30.3506	8	17.8455	5	24.7659	5	71.7632	18.6598	4.49928	2.1697	2.72614e-06	2.9244e-05
hsa-miR-374b-5p	588.736	834.374	2403	851.373	1514	876.112	1478	802.235	1084	934.469	2005	121.235	47	205.623	110	201.742	56	261.194	80	173.361	38	859.713	192.631	4.60518	2.20326	1.50038e-09	6.24866e-08
hsa-miR-374c-3p	588.736	834.374	2403	851.373	1514	876.112	1478	802.235	1084	934.469	2005	121.235	47	205.623	110	201.742	56	261.194	80	173.361	38	859.713	192.631	4.60518	2.20326	1.50038e-09	6.24866e-08
hsa-miR-152-5p	7.45387	7.81087	22	7.02685	12	10.9625	18	7.76714	10	11.4158	24	1.27615	0	2.79126	1	1.78533	0	1.62232	0	2.25144	0	8.99664	1.9453	4.6741	2.22469	3.90354e-05	0.000281608
hsa-miR-15b-5p	596.211	1191.24	3431	1096.47	1950	1120.25	1890	1051.52	1421	1327.73	2849	220.775	86	307.969	165	233.878	65	303.374	93	168.858	37	1157.44	246.971	4.7167	2.23778	2.31089e-09	7.79101e-08
hsa-miR-33a-3p	4.83896	7.46372	21	8.7133	15	16.2956	27	6.28769	8	8.15418	17	3.82846	1	0.930419	0	1.78533	0	1.62232	0	2.25144	0	9.3829	2.0836	4.7271	2.24096	0.00035459	0.00169628
hsa-miR-1248	75.0208	30.0284	86	33.4478	59	32.8875	55	33.6576	45	37.0433	79	8.93308	3	4.65209	2	8.92664	2	17.8455	5	2.25144	0	33.4129	8.52176	4.83202	2.27263	0.000420086	0.00191884
hsa-miR-30b-5p	438.714	298.722	860	315.646	561	343.393	579	357.658	483	433.569	930	39.5608	15	93.9723	50	94.6224	26	105.451	32	47.2803	10	349.798	76.1773	4.8406	2.27519	7.32515e-07	9.60408e-06
hsa-miR-374b-3p	28.4543	43.2201	124	45.2529	80	43.5538	73	41.7946	56	50.0899	107	1.27615	0	13.9563	7	26.7799	7	4.86696	1	24.7659	5	44.7823	14.329	5.15774	2.36674	8.51684e-05	0.000494256
hsa-miR-181a-3p	955.438	1422.45	4097	1255	2232	1606.75	2711	1659.58	2243	1856.59	3984	292.239	114	244.7	131	269.585	75	322.842	99	366.985	81	1560.07	299.27	5.25398	2.39341	4.36766e-09	1.34835e-07
hsa-miR-26a-2-3p	33.6505	41.8315	120	41.3179	73	38.8132	65	34.3973	46	28.6561	61	19.1423	7	12.0954	6	1.78533	0	4.86696	1	6.75433	1	37.0032	8.92888	5.25824	2.39458	2.45855e-05	0.000193406
hsa-miR-505-3p	33.3878	35.93	103	32.8857	58	35.8504	60	29.2192	39	37.0433	79	1.27615	0	10.2346	5	16.068	4	8.11161	2	6.75433	1	34.1857	8.48893	5.34534	2.41828	1.85657e-05	0.000158368
hsa-miR-374a-3p	208.672	260.536	750	265.615	472	298.358	503	232.644	314	281.203	603	31.9039	12	49.3122	26	76.7691	21	40.558	12	51.7832	11	267.671	50.0653	5.63644	2.49478	1.59093e-09	6.25765e-08
hsa-miR-1277-5p	17.9969	13.3653	38	10.9619	19	13.3328	22	12.9452	17	14.6775	31	1.27615	0	2.79126	1	1.78533	0	1.62232	0	2.25144	0	13.0565	1.9453	6.90468	2.78757	4.75899e-07	6.47955e-06
hsa-miR-642a-5p	46.6748	89.391	257	87.414	155	54.8126	92	74.3426	100	103.209	221	11.4854	4	19.5388	10	5.35599	1	8.11161	2	15.7601	3	81.8338	12.0504	7.25809	2.85959	2.03035e-07	3.34299e-06
hsa-miR-32-3p	65.4208	88.3496	254	95.2841	169	128.884	217	101.713	137	100.879	216	11.4854	4	12.0954	6	23.2093	6	14.6009	4	11.2572	2	103.022	14.5296	7.33282	2.87437	4.38022e-09	1.34835e-07
hsa-miR-7974	9.9107	23.7798	68	5.90256	10	35.2578	59	24.7809	33	30.054	64	1.27615	0	0.930419	0	1.78533	0	14.6009	4	6.75433	1	23.955	5.06942	7.42786	2.89295	0.000336773	0.00163312
hsa-miR-3074-5p	1442.74	1406.48	4051	1400.03	2490	1349.57	2277	987.167	1334	1568.63	3366	340.733	133	488.47	262	248.161	69	53.5366	16	33.7716	7	1342.38	232.934	8.04008	3.00721	1.49776e-06	1.8283e-05
hsa-miR-181b-3p	24.4141	34.1942	98	40.1936	71	47.7018	80	43.2741	58	41.7028	89	6.38077	2	4.65209	2	5.35599	1	1.62232	0	6.75433	1	41.4133	4.9531	9.16229	3.19571	3.15148e-07	4.55357e-06
hsa-miR-32-5p	755.256	998.923	2877	1003.72	1785	1107.21	1868	949.441	1283	1330.06	2854	65.0839	25	92.1114	49	144.612	40	105.451	32	209.384	46	1077.87	123.328	9.75531	3.28619	2.86077e-11	4.05084e-09
hsa-miR-142-5p	11674.1	13864.6	39938	10935.7	19453	11009	18578	8866.01	11985	11527.4	24739	886.928	347	1169.54	628	1337.21	374	923.101	284	1497.21	332	11240.6	1162.8	9.91687	3.30988	3.52321e-14	8.31478e-12
hsa-miR-29c-3p	104.61	25.5155	73	33.4478	59	37.6281	63	12.2055	16	21.2009	45	1.27615	0	0.930419	0	1.78533	0	1.62232	0	2.25144	0	25.9996	1.57313	16.3234	4.02887	3.65204e-08	7.83528e-07
hsa-miR-4518	13.9954	32.4585	93	15.4591	27	50.6646	85	40.3152	54	50.5559	108	1.27615	0	0.930419	0	8.92664	2	1.62232	0	2.25144	0	37.8906	3.0014	17.1224	4.09782	1.92165e-07	3.23936e-06
hsa-miR-3607-3p	77.0776	34.1942	98	38.5071	68	36.443	61	31.4384	42	33.7816	72	1.27615	0	2.79126	1	1.78533	0	1.62232	0	2.25144	0	34.8729	1.9453	18.4316	4.20411	8.67406e-10	5.11769e-08
hsa-miR-124-5p	34.3188	98.0698	282	27.2642	48	112.292	189	69.1645	93	172.17	369	8.93308	3	0.930419	0	1.78533	0	1.62232	0	20.263	4	95.792	6.70683	24.9064	4.63845	8.37213e-07	1.05848e-05

## Sheet: NK-ACTvsNK-REST
ID	AvrExp	Norm_Activated 1	Raw_Activated 1	Norm_Activated 2	Raw_Activated 2	Norm_Activated 3	Raw_Activated 3	Norm_Activated 4	Raw_Activated 4	Norm_Activated 5	Raw_Activated 5	Norm_Resting 1	Raw_Resting 1	Norm_Resting 2	Raw_Resting 2	Norm_Resting 3	Raw_Resting 3	Norm_Resting 4	Raw_Resting 4	Norm_Resting 5	Raw_Resting 5	ave_ACT	ave_REST	foldChange	logFC	P.Value	adj.P.Val
hsa-miR-338-3p	82.3276	0.867874	2	0.281074	0	0.888853	1	0.369864	0	4.42655	9	299.932	309	158.046	157	275.881	495	159.432	192	320.559	788	1.36684	242.77	-282.245	-8.1408	3.24659e-13	1.27699e-11
hsa-miR-1-3p	51.7207	1.90932	5	1.96752	3	2.07399	3	1.10959	1	1.63084	3	160.384	165	73.7549	73	161.743	290	65.8433	79	223.395	549	1.73825	137.024	-74.2519	-6.21436	3.23416e-10	5.45187e-09
hsa-miR-451a	58.2433	0.867874	2	1.40537	2	2.66656	4	5.54796	7	0.232976	0	21.8045	22	74.7584	74	109.406	196	62.5304	75	83.138	204	2.14415	70.3275	-50.6905	-5.66364	3.95263e-09	4.6641e-08
hsa-miR-126-3p	371.969	3.29792	9	8.7133	15	9.18481	15	9.2466	12	8.62013	18	233.065	240	1547.85	1542	120.542	216	191.732	231	223.802	550	7.81255	463.398	-39.0891	-5.28869	2.04313e-08	1.95478e-07
hsa-miR-126-5p	20.7997	0.520725	1	0.843222	1	0.296284	0	0.369864	0	0.232976	0	13.0827	13	97.8382	97	10.3003	18	5.38341	6	14.0257	34	0.452614	28.1261	-37.066	-5.21202	1.0342e-07	7.87324e-07
hsa-miR-876-3p	18.8358	1.56217	4	2.52967	4	0.296284	0	0.369864	0	3.9606	8	20.8354	21	25.5885	25	17.5384	31	75.7819	91	116.474	286	1.74372	51.2437	-34.5472	-5.1105	5.20871e-07	3.23488e-06
hsa-miR-338-5p	178.683	16.1425	46	7.589	13	20.4436	34	10.7261	14	23.9966	51	508.286	524	397.875	396	435.675	782	460.903	556	664.494	1634	15.7795	493.447	-33.151	-5.05098	7.50646e-15	5.39672e-13
hsa-miR-876-5p	9.84053	0.520725	1	0.281074	0	0.888853	1	1.10959	1	2.09679	4	13.0827	13	15.5538	15	12.5274	22	36.8557	44	54.2734	133	0.979406	26.4586	-29.3846	-4.87699	1.55084e-08	1.54647e-07
hsa-miR-181b-2-3p	15.5479	2.95077	8	1.40537	2	2.07399	3	0.369864	0	2.56274	5	50.8771	52	31.6093	31	34.2416	61	33.5428	40	61.9978	152	1.87255	42.4537	-26.2435	-4.71389	4.12882e-10	6.49602e-09
hsa-miR-31-5p	11.8178	0.520725	1	0.843222	1	2.07399	3	0.369864	0	3.49465	7	14.0518	14	8.52948	8	45.3771	81	21.9478	26	67.6893	166	1.46049	31.5191	-25.5961	-4.67785	2.42152e-07	1.60228e-06
hsa-miR-181a-2-3p	3355.67	279.282	804	405.59	721	295.395	498	333.247	450	527.226	1131	9358.96	9657	6319.34	6297	6275.68	11271	9889.33	11940	15513.5	38159	368.148	9471.35	-25.3788	-4.66555	4.01018e-15	3.54901e-13
hsa-miR-141-3p	19.0037	3.99222	11	1.96752	3	1.48142	2	1.10959	1	3.9606	8	54.7534	56	43.6509	43	59.8532	107	50.9354	61	52.2407	128	2.50227	52.2867	-22.9426	-4.51996	3.90143e-11	8.12415e-10
hsa-miR-342-5p	141.525	17.5311	50	16.0212	28	16.8882	28	15.9041	21	11.8818	25	312.531	322	529.33	527	309.845	556	344.952	416	301.858	742	15.6453	359.703	-22.4398	-4.48799	1.75191e-14	1.03363e-12
hsa-miR-873-5p	111.116	16.4896	47	6.4647	11	3.85169	6	12.9452	17	32.8497	70	165.229	170	179.119	178	111.633	200	415.351	501	670.592	1649	14.5202	308.385	-21.8027	-4.44643	3.12484e-08	2.84712e-07
hsa-miR-26b-5p	14797.5	2580.19	7432	2002.09	3561	1618.6	2731	1587.83	2146	1803.47	3870	41808.8	43142	39989.7	39851	41457.1	74459	36475.1	44040	45411.4	111701	1918.44	41028.4	-21.5842	-4.4319	9.4066e-20	6.65987e-17
hsa-miR-95-3p	40.4142	3.99222	11	6.4647	11	5.6294	9	4.80823	6	7.68822	16	115.806	119	85.7966	85	111.633	200	89.0333	107	128.264	315	5.71656	106.107	-19.1506	-4.25932	6.72916e-13	2.26869e-11
hsa-miR-139-3p	3.75326	0.173575	0	0.281074	0	0.296284	0	0.369864	0	0.698929	1	1.45363	1	16.5572	16	5.28935	9	6.21163	7	9.96029	24	0.363945	7.89443	-18.9939	-4.24746	1.08233e-06	6.43941e-06
hsa-miR-22-5p	231.502	48.7745	140	19.3941	34	28.147	47	35.8768	48	40.3049	86	705.98	728	516.285	514	554.268	995	575.197	694	727.508	1789	34.4995	615.848	-18.3571	-4.19827	2.06974e-14	1.12721e-12
hsa-miR-144-3p	14.8816	0.520725	1	3.09181	5	1.48142	2	0.369864	0	0.698929	1	4.36089	4	21.5746	21	23.1061	41	18.6349	22	19.3108	47	1.23255	17.3974	-17.4397	-4.12431	1.67959e-07	1.21342e-06
hsa-miR-1468-5p	15.4165	1.56217	4	0.843222	1	1.48142	2	1.10959	1	2.56274	5	20.8354	21	21.5746	21	11.4139	20	26.0888	31	28.6613	70	1.51183	21.7148	-14.5513	-3.86308	3.09115e-08	2.84712e-07
hsa-miR-6513-3p	3.10571	0.520725	1	0.281074	0	0.296284	0	0.369864	0	1.16488	2	8.23724	8	6.52255	6	3.06226	5	9.5245	11	8.74067	21	0.526566	7.21744	-14.5491	-3.86286	3.68704e-08	3.14509e-07
hsa-miR-3065-5p	9.37469	1.56217	4	1.40537	2	2.66656	4	1.10959	1	2.09679	4	22.7735	23	13.5468	13	33.6848	60	21.1195	25	29.0678	71	1.7681	24.0385	-14.0211	-3.80953	1.44778e-09	1.8982e-08
hsa-miR-3074-3p	5.22012	0.867874	2	1.40537	2	0.296284	0	1.10959	1	1.16488	2	14.0518	14	16.5572	16	8.62999	15	12.0091	14	10.7734	26	0.968801	12.4043	-13.6839	-3.77441	3.24397e-08	2.87326e-07
hsa-miR-4772-3p	162.903	74.8108	215	24.4534	43	24.5916	41	15.1644	20	28.6561	61	547.05	564	292.511	291	533.111	957	222.376	268	444.961	1094	33.5353	408.002	-12.9126	-3.69071	2.75488e-10	4.75721e-09
hsa-miR-22-3p	9473.98	2339.96	6740	1482.1	2636	2224.21	3753	1793.47	2424	2045.3	4389	28732	29648	18785.4	18720	21185	38049	23202.9	28015	30439.7	74874	1977.01	24469	-12.3571	-3.62727	7.86866e-17	1.857e-14
hsa-miR-1284	2.26139	0.173575	0	0.843222	1	0.296284	0	0.369864	0	0.232976	0	6.29907	6	7.52601	7	2.50548	4	2.89876	3	3.04907	7	0.383184	4.45568	-11.9636	-3.58058	1.96147e-07	1.36011e-06
hsa-miR-409-3p	12.1439	0.173575	0	0.281074	0	0.296284	0	0.369864	0	0.232976	0	4.36089	4	35.6231	35	1.39193	2	0.414109	0	3.86216	9	0.270755	9.13045	-11.8816	-3.57065	0.00021787	0.00071084
hsa-miR-370-3p	5.06093	0.173575	0	0.281074	0	0.888853	1	0.369864	0	0.232976	0	1.45363	1	35.6231	35	1.94871	3	1.24233	1	6.70795	16	0.389268	9.39515	-11.8343	-3.5649	0.000146906	0.000490609
hsa-miR-28-5p	1022.42	237.277	683	293.16	521	199.992	337	180.124	243	223.424	479	2895.15	2987	2202.11	2194	2530.26	4544	2396.45	2893	2816.32	6927	226.795	2568.06	-11.4154	-3.5129	2.75033e-16	4.86808e-14
hsa-miR-29c-3p	104.61	25.5155	73	33.4478	59	37.6281	63	12.2055	16	21.2009	45	303.809	313	294.518	293	386.679	694	183.45	221	262.83	646	25.9996	286.257	-11.3897	-3.50966	6.76184e-12	1.54432e-10
hsa-miR-218-5p	4.53663	0.520725	1	1.40537	2	0.888853	1	0.369864	0	0.698929	1	23.7426	24	1.5052	1	7.51645	13	7.03985	8	11.993	29	0.776748	10.3594	-11.0402	-3.46469	1.63636e-05	7.02146e-05
hsa-miR-150-5p	16305.4	4220.82	12158	2802.59	4985	4663.81	7870	4585.2	6198	4054.96	8702	35463.3	36594	36236.8	36111	63996.4	114941	40130.8	48454	42147.3	103672	4065.48	43594.9	-10.7461	-3.42575	1.48654e-15	1.50352e-13
hsa-miR-143-3p	317.874	2.60362	7	10.3997	18	19.851	33	12.9452	17	6.29036	13	16.959	17	2479.07	2470	197.933	355	26.0888	31	25.8155	63	10.418	549.173	-10.7226	-3.42258	0.0036704	0.0089415
hsa-miR-3941	1.75893	0.173575	0	0.281074	0	0.296284	0	0.369864	0	0.698929	1	5.32998	5	2.50867	2	2.50548	4	2.89876	3	3.45561	8	0.363945	3.3397	-9.80686	-3.29379	2.3377e-07	1.56141e-06
hsa-miR-4728-3p	2.72618	0.173575	0	1.96752	3	0.296284	0	0.369864	0	1.16488	2	3.39181	3	6.52255	6	8.62999	15	7.86806	9	2.64253	6	0.794425	5.81099	-9.68342	-3.27552	8.56819e-06	4.21269e-05
hsa-miR-664a-5p	30.7397	7.46372	21	7.589	13	9.18481	15	6.28769	8	6.75632	14	83.826	86	78.7723	78	74.8861	134	57.5611	69	56.7127	139	7.45631	70.3516	-9.29673	-3.21672	5.78935e-11	1.13857e-09
hsa-miR-1273g-3p	7.39193	0.173575	0	1.40537	2	2.07399	3	1.10959	1	0.232976	0	20.8354	21	5.51908	5	9.18677	16	7.03985	8	1.4229	3	0.999101	8.80079	-9.16428	-3.19602	0.000358769	0.00111407
hsa-miR-151a-3p	146.286	14.7539	42	31.7614	56	32.8875	55	44.7535	60	58.943	126	296.056	305	310.574	309	152.834	274	302.713	365	451.872	1111	36.6199	302.81	-8.86214	-3.14766	1.50258e-09	1.93423e-08
hsa-miR-4683	2.41295	0.173575	0	0.281074	0	0.296284	0	1.10959	1	1.16488	2	5.32998	5	0.501734	0	8.62999	15	3.72698	4	7.1145	17	0.605081	5.06064	-8.74373	-3.12825	0.000133041	0.000446414
hsa-miR-615-3p	8.87899	0.520725	1	3.09181	5	0.296284	0	0.369864	0	0.698929	1	13.0827	13	36.6266	36	6.95967	12	33.5428	40	0.203271	0	0.995523	18.083	-8.66806	-3.11571	0.015945	0.0318003
hsa-miR-543	6.91278	0.173575	0	0.281074	0	0.296284	0	0.369864	0	0.232976	0	4.36089	4	19.5676	19	0.278387	0	1.24233	1	2.64253	6	0.270755	5.61835	-8.58502	-3.10182	0.000680077	0.00197334
hsa-miR-411-5p	8.79376	0.173575	0	0.281074	0	0.296284	0	0.369864	0	0.232976	0	3.39181	3	19.5676	19	1.39193	2	0.414109	0	1.82944	4	0.270755	5.31899	-8.56328	-3.09816	0.000251726	0.000806435
hsa-miR-181a-5p	58216.9	19609.3	56486	15660	27857	14417.5	24330	16541.4	22361	20466.3	43923	151273	156098	98194.9	97855	123784	222323	131533	158814	229459	564416	17338.9	146849	-8.15236	-3.02722	1.17177e-14	7.54197e-13
hsa-miR-486-5p	40.7186	1.56217	4	0.843222	1	5.6294	9	2.58905	3	1.16488	2	5.32998	5	51.6786	51	14.1977	25	16.9785	20	12.3996	30	2.35774	20.1169	-8.13685	-3.02447	1.27913e-05	5.76833e-05
hsa-miR-151a-5p	10.1006	1.56217	4	2.52967	4	3.25913	5	2.58905	3	4.89251	10	28.5881	29	8.52948	8	19.7655	35	21.1195	25	35.1659	86	2.9665	22.6337	-7.7754	-2.95892	1.75198e-06	9.9232e-06
hsa-miR-3960	2.99162	0.173575	0	0.281074	0	2.07399	3	0.369864	0	0.232976	0	19.8663	20	1.5052	1	3.61903	6	4.55519	5	0.609814	1	0.626296	6.03111	-7.60939	-2.92778	0.00117685	0.00320465
hsa-miR-127-3p	21.8067	0.173575	0	0.281074	0	0.888853	1	0.369864	0	0.698929	1	2.42272	2	20.5711	20	1.39193	2	1.24233	1	3.45561	8	0.482459	5.81674	-7.55611	-2.91764	0.000273725	0.000869048
hsa-miR-654-3p	3.44874	0.173575	0	0.281074	0	0.296284	0	0.369864	0	0.232976	0	0.484544	0	34.6197	34	1.39193	2	0.414109	0	3.04907	7	0.270755	7.99186	-7.45894	-2.89897	0.00267697	0.00674481
hsa-miR-100-5p	56.6307	11.6295	33	5.34041	9	8.59224	14	1.84932	2	19.337	41	173.951	179	41.6439	41	5.84612	10	52.5918	63	247.788	609	9.34971	104.364	-7.35224	-2.87818	0.00204129	0.00527458
hsa-miR-335-5p	6.33447	3.99222	11	0.843222	1	1.48142	2	1.10959	1	1.16488	2	15.9899	16	14.5503	14	17.5384	31	4.55519	5	8.33412	20	1.71827	12.1936	-7.24863	-2.85771	2.67827e-06	1.41508e-05
hsa-miR-146b-5p	27032.5	11407.2	32859	7617.39	13550	7806.79	13174	6956.03	9403	10230.7	21956	77931.6	80417	55639.8	55447	68068.7	122255	51807.9	62553	64993.8	159869	8803.61	63688.3	-7.22134	-2.85227	1.3269e-15	1.50352e-13
hsa-miR-101-3p	3267.84	994.063	2863	1305.03	2321	1135.06	1915	1163.22	1572	1254.11	2691	7856.87	8107	7354.92	7329	8868.57	15928	6938.39	8377	10712.2	26349	1170.3	8346.19	-7.18442	-2.84487	7.62248e-15	5.39672e-13
hsa-miR-6503-3p	1.48159	0.173575	0	0.281074	0	0.296284	0	0.369864	0	0.232976	0	2.42272	2	3.51214	3	0.278387	0	4.55519	5	2.23598	5	0.270755	2.60088	-6.93146	-2.79316	0.000210645	0.000690448
hsa-let-7g-3p	11.3196	5.38082	15	5.34041	9	5.03683	8	1.84932	2	2.56274	5	25.6808	26	23.5815	23	33.6848	60	26.0888	31	21.3435	52	4.03402	26.0759	-6.83542	-2.77303	7.10061e-08	5.58582e-07
hsa-miR-181c-5p	19.7386	13.7124	39	5.90256	10	3.85169	6	4.80823	6	6.75632	14	32.4644	33	37.6301	37	61.5235	110	35.1992	42	59.5585	146	7.00624	45.2751	-6.80434	-2.76646	2.24873e-07	1.53087e-06
hsa-miR-125b-5p	30.5698	2.25647	6	3.09181	5	4.44426	7	7.76714	10	10.018	21	17.9281	18	22.578	22	27.5603	49	32.7146	39	64.437	158	5.51554	33.0436	-6.80105	-2.76576	2.08263e-06	1.13423e-05
hsa-miR-374c-5p	1.87485	0.173575	0	0.281074	0	0.888853	1	1.10959	1	0.698929	1	5.32998	5	2.50867	2	2.50548	4	2.89876	3	3.86216	9	0.630404	3.42101	-6.63247	-2.72955	1.43144e-05	6.29479e-05
hsa-miR-144-5p	2.34277	0.520725	1	0.281074	0	0.296284	0	0.369864	0	0.232976	0	0.484544	0	5.51908	5	2.50548	4	2.07054	2	3.04907	7	0.340185	2.72574	-6.55253	-2.71205	0.000265843	0.000847823
hsa-miR-381-3p	17.9148	0.520725	1	2.52967	4	0.888853	1	0.369864	0	0.698929	1	4.36089	4	57.6994	57	4.1758	7	0.414109	0	8.33412	20	1.00161	14.9969	-6.54755	-2.71095	0.00519442	0.0120975
hsa-miR-2110	44.6389	11.9767	34	12.6483	22	15.1105	25	12.2055	16	15.6094	33	82.857	85	108.876	108	92.7028	166	81.5794	98	69.3155	170	13.5101	87.0662	-6.36678	-2.67056	3.16685e-09	3.80022e-08
hsa-miR-200a-3p	67.1925	25.5155	73	31.7614	56	22.8139	38	30.6987	41	17.4732	37	184.611	190	149.015	148	133.347	239	154.462	186	168.512	414	25.6525	157.99	-6.31341	-2.65842	4.40811e-11	8.91698e-10
hsa-miR-200b-3p	85.5102	29.3341	84	40.7557	72	19.2585	32	41.7946	56	33.7816	72	234.035	241	153.029	152	151.164	271	197.53	238	204.694	503	32.9849	188.09	-5.86921	-2.55317	6.05566e-10	8.57482e-09
hsa-miR-30d-5p	2845.34	1048.91	3021	1292.66	2299	873.15	1473	1078.89	1458	1251.32	2685	5762.68	5946	5103.14	5085	6699.94	12033	5675.36	6852	8561.99	21060	1108.99	6360.62	-5.78055	-2.53121	3.15022e-13	1.27699e-11
hsa-miR-3065-3p	1.31016	0.173575	0	0.281074	0	0.296284	0	0.369864	0	0.698929	1	2.42272	2	2.50867	2	1.94871	3	2.07054	2	1.01636	2	0.363945	1.9934	-5.68731	-2.50775	2.49115e-05	9.96459e-05
hsa-miR-493-5p	5.49632	0.173575	0	0.281074	0	0.296284	0	0.369864	0	0.232976	0	0.484544	0	18.5642	18	1.39193	2	0.414109	0	1.4229	3	0.270755	4.45553	-5.61566	-2.48945	0.00621715	0.0140183
hsa-miR-1277-3p	16.7112	7.81087	22	8.7133	15	6.22197	10	5.54796	7	5.82441	12	44.0935	45	30.6058	30	48.1609	86	33.5428	40	35.1659	86	6.8237	38.3138	-5.5946	-2.48404	2.33463e-07	1.56141e-06
hsa-miR-6803-3p	2.60937	0.867874	2	1.40537	2	0.888853	1	0.369864	0	1.16488	2	5.32998	5	1.5052	1	8.07322	14	4.55519	5	7.1145	17	0.939369	5.31562	-5.57967	-2.48018	3.98423e-05	0.000148465
hsa-miR-193a-5p	21.6765	2.95077	8	2.52967	4	7.99967	13	4.80823	6	2.56274	5	15.9899	16	49.6717	49	16.4248	29	17.8067	21	17.6846	43	4.17022	23.5155	-5.57813	-2.47978	2.98026e-05	0.000114675
hsa-miR-4772-5p	149.605	142.158	409	47.5015	84	47.1092	79	27.7398	37	65.9323	141	435.605	449	224.275	223	397.815	714	190.076	229	446.587	1098	66.0881	338.872	-5.50672	-2.46119	1.41198e-07	1.0523e-06
hsa-miR-3607-3p	77.0776	34.1942	98	38.5071	68	36.443	61	31.4384	42	33.7816	72	247.602	255	122.925	122	211.296	379	165.229	199	225.021	553	34.8729	194.415	-5.47824	-2.45371	1.69526e-10	3.15854e-09
hsa-miR-199a-5p	34.8008	5.72797	16	3.65396	6	7.99967	13	7.76714	10	3.9606	8	33.4335	34	198.185	197	13.641	24	14.4938	17	24.5958	60	5.82187	56.8698	-5.44462	-2.44483	0.000323036	0.00101199
hsa-miR-200c-3p	303.15	151.184	435	99.7813	177	84.441	142	96.5345	130	126.972	272	605.195	624	495.212	493	589.902	1059	611.638	738	701.489	1725	111.783	600.687	-5.43138	-2.44132	5.29085e-12	1.38738e-10
hsa-miR-628-3p	3.6502	1.90932	5	2.52967	4	0.888853	1	0.369864	0	1.16488	2	7.26815	7	8.52948	8	4.73258	8	7.03985	8	5.48833	13	1.37252	6.61168	-5.42566	-2.4398	2.86731e-05	0.000112158
hsa-miR-505-5p	16.8739	6.42227	18	6.4647	11	2.66656	4	7.76714	10	5.35846	11	24.7117	25	44.6544	44	19.7655	35	35.1992	42	28.2547	69	5.73583	30.5171	-5.31229	-2.40933	1.58111e-06	9.10104e-06
hsa-miR-379-5p	13.4815	0.173575	0	0.281074	0	0.296284	0	0.369864	0	1.16488	2	0.484544	0	24.585	24	1.39193	2	1.24233	1	1.4229	3	0.457136	5.82534	-5.26784	-2.39721	0.00574146	0.0131128
hsa-miR-495-3p	3.33898	0.173575	0	0.281074	0	0.296284	0	0.369864	0	0.232976	0	1.45363	1	13.5468	13	1.39193	2	1.24233	1	0.203271	0	0.270755	3.5676	-5.11019	-2.35338	0.00764312	0.0169104
hsa-miR-499a-5p	42.0801	25.1684	72	26.702	47	21.6287	36	9.98632	13	12.8137	27	109.991	113	67.7341	67	97.157	174	80.7512	97	110.783	272	19.2598	93.2833	-5.06634	-2.34094	3.28721e-08	2.87326e-07
hsa-miR-30e-5p	1851.63	1021.14	2941	917.145	1631	739.822	1248	713.467	964	896.726	1924	4413.71	4554	3430.36	3418	4913.81	8825	3695.92	4462	5024.26	12358	857.66	4295.61	-5.01573	-2.32646	2.57846e-13	1.14097e-11
hsa-miR-101-5p	1.46882	0.520725	1	0.843222	1	0.296284	0	0.369864	0	0.232976	0	2.42272	2	3.51214	3	2.50548	4	0.414109	0	3.04907	7	0.452614	2.3807	-4.81089	-2.2663	0.000590998	0.00172904
hsa-miR-136-3p	3.1572	0.173575	0	0.281074	0	0.296284	0	0.369864	0	0.232976	0	4.36089	4	8.52948	8	0.278387	0	0.414109	0	1.01636	2	0.270755	2.91985	-4.80438	-2.26435	0.00686367	0.0153296
hsa-miR-139-5p	30.5657	4.33937	12	3.09181	5	9.77738	16	1.84932	2	7.68822	16	15.9899	16	43.6509	43	19.2087	34	16.1502	19	24.5958	60	5.34922	23.9191	-4.79119	-2.26038	1.24979e-05	5.67214e-05
hsa-miR-6842-5p	3.99857	0.867874	2	0.281074	0	0.296284	0	3.32877	4	1.16488	2	3.39181	3	6.52255	6	4.1758	7	3.72698	4	2.23598	5	1.18778	4.01062	-4.75765	-2.25025	0.00222755	0.00567305
hsa-miR-140-3p	1546.18	973.234	2803	733.322	1304	602.346	1016	597.33	807	722.46	1550	3386.48	3494	3152.4	3141	3692.8	6632	3172.49	3830	3457.44	8504	725.738	3372.32	-4.68789	-2.22894	5.75128e-13	2.14311e-11
hsa-miR-1248	75.0208	30.0284	86	33.4478	59	32.8875	55	33.6576	45	37.0433	79	399.748	412	104.862	104	184.014	330	131.272	158	95.7408	235	33.4129	183.128	-4.65324	-2.21824	1.02023e-06	6.16807e-06
hsa-miR-3194-3p	11.8476	7.81087	22	4.77826	8	3.85169	6	2.58905	3	8.15418	17	32.4644	33	21.5746	21	23.1061	41	12.8374	15	34.7594	85	5.43681	24.9484	-4.65238	-2.21797	1.36151e-05	6.02469e-05
hsa-miR-5193	2.96935	0.520725	1	1.40537	2	0.888853	1	1.10959	1	2.09679	4	4.36089	4	7.52601	7	5.84612	10	4.55519	5	3.86216	9	1.20427	5.23008	-4.64653	-2.21615	9.00568e-05	0.00031409
hsa-miR-133a-3p	1.33606	0.867874	2	0.281074	0	0.296284	0	0.369864	0	0.232976	0	2.42272	2	3.51214	3	1.94871	3	0.414109	0	1.82944	4	0.409615	2.02542	-4.50906	-2.17283	0.000737361	0.00211357
hsa-miR-3609	4.84971	0.867874	2	4.77826	8	3.25913	5	1.10959	1	2.56274	5	12.1136	12	9.53295	9	8.07322	14	7.03985	8	9.96029	24	2.51552	9.34398	-4.49761	-2.16916	6.07808e-05	0.000220681
hsa-miR-5000-3p	1.39167	0.173575	0	0.281074	0	0.296284	0	0.369864	0	2.09679	4	2.42272	2	1.5052	1	1.94871	3	2.89876	3	1.01636	2	0.643517	1.95835	-4.41714	-2.14311	0.000913879	0.00256757
hsa-miR-6766-3p	1.73816	0.520725	1	1.96752	3	0.296284	0	0.369864	0	0.232976	0	3.39181	3	1.5052	1	1.39193	2	4.55519	5	1.4229	3	0.677474	2.45341	-4.35708	-2.12336	0.00106197	0.00291425
hsa-miR-342-3p	2249.64	1147.85	3306	1255	2232	1076.4	1816	986.427	1333	1232.21	2644	6031.11	6223	3148.38	3137	8440.41	15159	3813.53	4604	4496.56	11060	1139.58	5186	-4.32595	-2.11302	8.7604e-10	1.21615e-08
hsa-miR-1287-3p	1.23423	0.173575	0	0.843222	1	0.296284	0	0.369864	0	0.232976	0	0.484544	0	3.51214	3	0.835161	1	2.07054	2	1.82944	4	0.383184	1.74637	-4.31616	-2.10975	0.000918124	0.0025693
hsa-miR-181b-5p	7787.11	3895.19	11220	3184.85	5665	3088.17	5211	3414.95	4616	4163.52	8935	17248.3	17798	14535.7	14485	15042.6	27017	11776	14218	16986	41781	3549.34	15117.7	-4.24688	-2.0864	1.97603e-13	9.32685e-12
hsa-miR-3661	1.82396	0.173575	0	0.281074	0	0.296284	0	1.84932	2	1.63084	3	0.484544	0	2.50867	2	4.1758	7	2.89876	3	2.64253	6	0.846218	2.54206	-4.11986	-2.0426	0.00534354	0.0123635
hsa-miR-1185-1-3p	2.27877	0.173575	0	0.281074	0	0.296284	0	0.369864	0	0.232976	0	0.484544	0	12.5434	12	0.278387	0	0.414109	0	2.23598	5	0.270755	3.19128	-4.11596	-2.04123	0.0216114	0.0413537
hsa-miR-616-5p	5.3594	3.29792	9	2.52967	4	1.48142	2	3.32877	4	2.09679	4	12.1136	12	6.52255	6	15.3113	27	11.1809	13	7.52104	18	2.54691	10.5299	-4.08215	-2.02933	0.000100193	0.000344352
hsa-miR-1249-3p	9.30369	3.29792	9	2.52967	4	4.44426	7	7.76714	10	4.89251	10	8.23724	8	15.5538	15	23.1061	41	13.6656	16	25.4089	62	4.5863	17.1943	-4.00571	-2.00206	2.97411e-05	0.000114675
hsa-miR-4796-3p	1.58223	0.173575	0	0.843222	1	0.888853	1	1.10959	1	0.232976	0	1.45363	1	2.50867	2	1.39193	2	2.07054	2	2.64253	6	0.649644	2.01346	-4.00287	-2.00104	0.00128466	0.00343221
hsa-miR-664a-3p	73.3529	33.4999	96	39.6314	70	31.7024	53	38.096	51	59.8749	128	219.498	226	107.873	107	241.361	433	135.413	163	114.442	281	40.5609	163.718	-3.90695	-1.96604	4.87896e-07	3.0842e-06
hsa-miR-223-5p	44.0129	14.7539	42	14.3348	25	28.147	47	9.98632	13	18.8711	40	30.5262	31	234.31	233	58.7396	105	51.7636	62	53.8669	132	17.2186	85.8413	-3.90683	-1.966	7.61526e-05	0.000270935
hsa-miR-199a-3p	35.2639	7.81087	22	12.6483	22	13.9254	23	12.2055	16	11.8818	25	43.1244	44	138.98	138	33.6848	60	23.6042	28	37.6052	92	11.6944	55.3998	-3.84744	-1.9439	2.2382e-05	9.10714e-05
hsa-miR-199b-3p	35.2639	7.81087	22	12.6483	22	13.9254	23	12.2055	16	11.8818	25	43.1244	44	138.98	138	33.6848	60	23.6042	28	37.6052	92	11.6944	55.3998	-3.84744	-1.9439	2.2382e-05	9.10714e-05
hsa-miR-24-2-5p	5.10778	3.99222	11	3.65396	6	3.25913	5	1.10959	1	2.56274	5	10.1754	10	8.52948	8	11.4139	20	8.69628	10	12.8061	31	2.91553	10.3242	-3.81261	-1.93078	3.61534e-05	0.00013688
hsa-miR-4777-3p	1.93865	0.867874	2	0.281074	0	0.888853	1	0.369864	0	0.698929	1	2.42272	2	3.51214	3	1.39193	2	1.24233	1	3.04907	7	0.621319	2.32364	-3.74988	-1.90685	0.00209132	0.00536469
hsa-miR-23b-3p	77.0975	20.3083	58	49.7501	88	47.7018	80	49.1919	66	44.9645	96	161.353	166	99.8451	99	227.442	408	124.647	150	138.834	341	42.3833	150.424	-3.71305	-1.8926	4.72808e-07	3.04316e-06
hsa-miR-221-5p	341.2	411.893	1186	145.315	258	115.847	195	88.3975	119	210.378	451	659.464	680	597.566	595	759.161	1363	502.314	606	679.129	1670	194.366	639.527	-3.69976	-1.88743	2.363e-06	1.26743e-05
hsa-miR-29b-3p	602.937	368.499	1061	372.985	663	293.618	495	299.22	404	385.576	827	1324.26	1366	1418.4	1413	1636.64	2939	901.514	1088	1170.23	2878	343.98	1290.21	-3.68921	-1.88331	3.83108e-10	6.30791e-09
hsa-miR-186-5p	5553.13	3419.95	9851	3587.91	6382	2451.16	4136	2393.39	3235	2897.06	6217	11189.6	11546	10037.2	10002	11928	21423	9934.05	11994	10760.6	26468	2949.89	10769.9	-3.67867	-1.87918	1.79258e-12	5.07658e-11
hsa-miR-1250-5p	2.79286	1.21502	3	0.843222	1	2.66656	4	0.369864	0	1.16488	2	12.1136	12	0.501734	0	4.73258	8	2.89876	3	7.52104	18	1.25191	5.55354	-3.64573	-1.86621	0.00821642	0.0178992
hsa-miR-1976	2.36004	1.21502	3	1.40537	2	1.48142	2	0.369864	0	1.16488	2	3.39181	3	3.51214	3	4.1758	7	2.89876	3	4.67524	11	1.12731	3.73075	-3.60997	-1.85199	0.00052427	0.00156618
hsa-miR-382-5p	6.35444	0.173575	0	0.281074	0	0.296284	0	0.369864	0	0.232976	0	1.45363	1	10.5364	10	0.835161	1	0.414109	0	0.203271	0	0.270755	2.68852	-3.57457	-1.83777	0.0223004	0.0423288
hsa-miR-411-3p	3.76273	0.173575	0	0.281074	0	0.296284	0	0.369864	0	0.232976	0	2.42272	2	5.51908	5	0.278387	0	0.414109	0	0.609814	1	0.270755	1.84882	-3.55874	-1.83137	0.0117013	0.0241532
hsa-miR-548a-3p	11.3495	7.11657	20	4.77826	8	7.4071	12	7.02741	9	4.89251	10	24.7117	25	18.5642	18	16.9816	30	24.4324	29	25.8155	63	6.24437	22.1011	-3.55687	-1.83061	0.000183113	0.000603409
hsa-miR-146b-3p	118.975	61.9662	178	45.2529	80	53.6274	90	58.8084	79	80.3769	172	242.756	250	190.157	189	212.966	382	180.137	217	217.704	535	60.0064	208.744	-3.50991	-1.81143	2.94361e-09	3.63558e-08
hsa-miR-369-3p	1.54477	0.173575	0	0.281074	0	0.296284	0	0.369864	0	0.232976	0	1.45363	1	4.51561	4	0.278387	0	0.414109	0	1.01636	2	0.270755	1.53562	-3.5091	-1.8111	0.00743523	0.016502
hsa-miR-643	1.56166	0.520725	1	0.281074	0	0.888853	1	0.369864	0	0.698929	1	1.45363	1	1.5052	1	1.94871	3	2.89876	3	1.4229	3	0.551889	1.84584	-3.45773	-1.78983	0.00122837	0.00331627
hsa-miR-6513-5p	1.61649	0.867874	2	0.281074	0	0.888853	1	0.369864	0	0.698929	1	4.36089	4	1.5052	1	0.835161	1	2.07054	2	2.64253	6	0.621319	2.28287	-3.43095	-1.77861	0.00176261	0.00460489
hsa-miR-873-3p	16.3965	10.2409	29	7.02685	12	0.888853	1	6.28769	8	29.588	63	17.9281	18	12.5434	12	8.07322	14	45.9661	55	63.6239	156	10.8065	29.6269	-3.34939	-1.7439	0.0127283	0.0261207
hsa-miR-6769b-3p	1.51788	0.173575	0	0.843222	1	0.888853	1	0.369864	0	0.698929	1	3.39181	3	1.5052	1	1.39193	2	2.07054	2	1.01636	2	0.594889	1.87517	-3.34838	-1.74346	0.00353675	0.00866443
hsa-miR-6733-5p	1.30893	0.867874	2	0.843222	1	0.296284	0	0.369864	0	0.232976	0	1.45363	1	3.51214	3	1.94871	3	0.414109	0	1.82944	4	0.522044	1.83161	-3.31006	-1.72686	0.00512491	0.011975
hsa-miR-99a-5p	191.455	29.3341	84	28.3885	50	86.8113	146	80.2605	108	137.223	294	91.5787	94	212.234	211	167.867	301	195.045	235	383.166	942	72.4035	209.978	-3.28109	-1.71417	0.000243185	0.000782612
hsa-miR-4795-3p	1.30032	1.56217	4	0.281074	0	0.296284	0	0.369864	0	0.232976	0	0.484544	0	0.501734	0	3.61903	6	1.24233	1	3.04907	7	0.548474	1.77934	-3.26408	-1.70668	0.0132588	0.0269748
hsa-let-7a-3p	142.389	128.272	369	91.9112	163	84.441	142	74.3426	100	86.9002	186	359.047	370	248.358	247	317.639	570	266.272	321	321.372	790	93.1734	302.538	-3.25265	-1.70161	1.9927e-08	1.94699e-07
hsa-miR-190b	2.26507	1.21502	3	0.843222	1	0.888853	1	1.10959	1	0.698929	1	7.26815	7	2.50867	2	1.94871	3	4.55519	5	1.82944	4	0.951124	3.62203	-3.20239	-1.67915	0.00182604	0.00475308
hsa-miR-1244	1.55039	0.173575	0	0.843222	1	0.296284	0	0.369864	0	0.232976	0	0.484544	0	2.50867	2	0.835161	1	2.07054	2	0.609814	1	0.383184	1.30175	-3.16632	-1.66281	0.00810401	0.0177472
hsa-miR-26a-5p	83012.4	44263.8	127506	55990.8	99601	56747.6	95765	52338.3	70753	55189.6	118444	153383	158275	146066	145561	145755	261785	167559	202312	223317	549308	52906	167216	-3.13451	-1.64824	1.33805e-12	3.94725e-11
hsa-let-7b-5p	2751.86	1306.15	3762	1347.75	2397	1282.61	2164	1428.04	1930	974.075	2090	4222.8	4357	3960.19	3946	4289.11	7703	3337.3	4029	3875.77	9533	1267.73	3937.03	-3.1334	-1.64773	2.34094e-10	4.24971e-09
hsa-miR-2355-3p	7.49177	1.90932	5	4.77826	8	3.85169	6	8.50687	11	6.29036	13	7.26815	7	11.5399	11	14.1977	25	20.2913	24	16.8715	41	5.0673	14.0337	-3.12928	-1.64583	0.00104226	0.00287128
hsa-miR-3605-3p	5.28088	3.29792	9	3.09181	5	2.07399	3	4.0685	5	2.56274	5	6.29907	6	11.5399	11	5.84612	10	10.3527	12	13.2126	32	3.01899	9.45009	-3.08794	-1.62665	0.000589317	0.00172904
hsa-miR-10b-5p	90.0946	0.173575	0	0.281074	0	0.296284	0	0.369864	0	0.698929	1	1.45363	1	0.501734	0	0.835161	1	2.89876	3	0.609814	1	0.363945	1.25982	-3.06988	-1.61818	0.0128457	0.0262854
hsa-miR-3653-5p	1.44207	0.520725	1	1.40537	2	0.296284	0	0.369864	0	0.232976	0	3.39181	3	0.501734	0	2.50548	4	2.07054	2	0.609814	1	0.565044	1.81588	-3.05514	-1.61124	0.0125101	0.0257475
hsa-miR-28-3p	908.232	574.012	1653	580.418	1032	415.687	701	481.193	650	575.685	1235	1712.86	1767	1461.55	1456	1485.75	2668	1489.55	1798	1793.46	4411	525.399	1588.64	-3.03625	-1.60229	5.70865e-10	8.24841e-09
hsa-miR-29c-5p	39.4127	21.3497	61	30.0749	53	26.9619	45	28.4795	38	31.4518	67	77.0424	79	74.7584	74	116.087	208	62.5304	75	85.9838	211	27.6636	83.2805	-3.03351	-1.60099	3.50985e-06	1.81385e-05
hsa-miR-511-5p	1.30618	0.173575	0	0.843222	1	0.296284	0	0.369864	0	0.232976	0	3.39181	3	0.501734	0	0.278387	0	2.07054	2	1.01636	2	0.383184	1.45177	-3.01705	-1.59314	0.0204271	0.039407
hsa-miR-340-5p	1401.32	668.784	1926	833.385	1482	1146.32	1934	1035.99	1400	1190.28	2554	2691.64	2777	2372.7	2364	2427.81	4360	2657.33	3208	4122.55	10140	974.951	2854.41	-2.98786	-1.57911	2.00749e-08	1.94699e-07
hsa-miR-7854-3p	1.7425	0.867874	2	0.281074	0	0.888853	1	0.369864	0	0.232976	0	1.45363	1	1.5052	1	1.94871	3	0.414109	0	2.23598	5	0.528128	1.51153	-2.96738	-1.56919	0.0171643	0.0338506
hsa-miR-1277-5p	17.9969	13.3653	38	10.9619	19	13.3328	22	12.9452	17	14.6775	31	35.3717	36	28.5989	28	32.0145	57	42.6532	51	56.3062	138	13.0565	38.9889	-2.96323	-1.56717	3.20009e-06	1.66593e-05
hsa-miR-493-3p	1.66266	0.173575	0	0.281074	0	0.296284	0	0.369864	0	0.232976	0	0.484544	0	3.51214	3	0.278387	0	0.414109	0	1.4229	3	0.270755	1.22242	-2.93905	-1.55535	0.0215661	0.0413537
hsa-miR-362-3p	2.02163	0.867874	2	0.281074	0	2.66656	4	1.10959	1	1.63084	3	3.39181	3	2.50867	2	5.28935	9	2.07054	2	2.64253	6	1.31119	3.18058	-2.93566	-1.55368	0.00416758	0.00993485
hsa-miR-6500-3p	1.54105	1.56217	4	0.281074	0	0.296284	0	0.369864	0	0.698929	1	1.45363	1	0.501734	0	3.61903	6	2.89876	3	1.01636	2	0.641665	1.8979	-2.91936	-1.54565	0.0150277	0.0302263
hsa-miR-361-3p	1457.12	1427.65	4112	1036.88	1844	900.408	1519	694.974	939	994.576	2134	3467.88	3578	2203.12	2195	3641.02	6539	2478.44	2992	2830.15	6961	1010.9	2924.12	-2.89881	-1.53546	1.71905e-07	1.22938e-06
hsa-miR-335-3p	18.308	12.3238	35	10.3997	18	6.22197	10	7.76714	10	4.42655	9	34.4026	35	23.5815	23	28.1171	50	20.2913	24	14.4323	35	8.22784	24.165	-2.88414	-1.52814	0.000304238	0.000957337
hsa-miR-200b-5p	3.54376	1.21502	3	1.96752	3	0.888853	1	3.32877	4	1.16488	2	3.39181	3	6.52255	6	2.50548	4	6.21163	7	4.67524	11	1.71301	4.66134	-2.88369	-1.52792	0.00390131	0.00936315
hsa-let-7b-3p	47.9171	33.8471	97	25.0156	44	28.7396	48	34.3973	46	24.9285	53	72.197	74	83.7896	83	67.648	121	80.7512	97	118.101	290	29.3856	84.4973	-2.87645	-1.52429	2.47297e-06	1.31644e-05
hsa-miR-340-3p	69.7233	34.8885	100	42.4422	75	44.1463	74	46.9727	63	63.6026	136	101.27	104	133.963	133	96.0435	172	94.8309	114	251.447	618	46.4105	135.511	-2.83094	-1.50128	9.90371e-06	4.80262e-05
hsa-miR-3615	144.374	130.702	376	116.646	207	69.6268	117	49.9316	67	74.3195	159	164.26	169	361.75	360	352.159	632	145.352	175	236.811	582	88.2451	252.067	-2.80177	-1.48634	3.24971e-05	0.000124367
hsa-miR-6731-3p	2.43321	0.867874	2	0.843222	1	0.888853	1	2.58905	3	1.16488	2	3.39181	3	3.51214	3	3.61903	6	1.24233	1	5.08178	12	1.27078	3.36942	-2.79998	-1.48541	0.00500002	0.0117219
hsa-miR-514a-3p	1.36504	0.520725	1	0.281074	0	2.07399	3	1.10959	1	0.232976	0	2.42272	2	1.5052	1	1.39193	2	1.24233	1	1.82944	4	0.843671	1.67832	-2.7628	-1.46613	0.0108127	0.0227839
hsa-miR-3614-3p	1.50478	0.867874	2	1.40537	2	1.48142	2	0.369864	0	0.232976	0	2.42272	2	1.5052	1	2.50548	4	2.89876	3	1.01636	2	0.871501	2.0697	-2.74508	-1.45685	0.0103598	0.0220263
hsa-miR-664b-3p	4.38969	3.29792	9	2.52967	4	3.85169	6	1.84932	2	3.9606	8	9.20633	9	5.51908	5	13.641	24	5.38341	6	8.74067	21	3.09784	8.49809	-2.71174	-1.43922	0.000578706	0.00171433
hsa-miR-4639-5p	1.65705	0.867874	2	1.40537	2	0.888853	1	0.369864	0	0.698929	1	4.36089	4	0.501734	0	1.94871	3	2.89876	3	3.04907	7	0.846178	2.55183	-2.69878	-1.43231	0.013157	0.0268449
hsa-miR-5009-5p	1.87312	0.867874	2	1.40537	2	0.296284	0	0.369864	0	1.63084	3	4.36089	4	1.5052	1	1.39193	2	2.07054	2	1.82944	4	0.914046	2.2316	-2.65851	-1.41062	0.0179845	0.0352715
hsa-miR-339-3p	355.293	296.292	853	251.561	447	205.325	346	200.096	270	252.313	541	686.598	708	555.42	553	606.605	1089	474.983	573	880.368	2165	241.118	640.795	-2.63684	-1.39881	1.80851e-07	1.26775e-06
hsa-miR-3913-3p	3.5039	1.56217	4	1.40537	2	2.07399	3	3.32877	4	3.02869	6	3.39181	3	5.51908	5	4.73258	8	6.21163	7	8.33412	20	2.2798	5.63784	-2.60789	-1.38288	0.00368774	0.0089415
hsa-miR-3913-5p	3.5039	1.56217	4	1.40537	2	2.07399	3	3.32877	4	3.02869	6	3.39181	3	5.51908	5	4.73258	8	6.21163	7	8.33412	20	2.2798	5.63784	-2.60789	-1.38288	0.00368774	0.0089415
hsa-miR-223-3p	213.322	50.1631	144	99.2191	176	194.659	328	151.274	204	139.087	298	109.991	113	1341.14	1336	464.628	834	183.45	221	177.862	437	126.88	455.413	-2.578	-1.36625	0.00678805	0.0152087
hsa-miR-194-3p	7.86567	5.03367	14	5.34041	9	7.99967	13	7.02741	9	4.42655	9	15.9899	16	7.52601	7	15.8681	28	16.9785	20	18.4977	45	5.96554	14.972	-2.56819	-1.36075	0.000516993	0.00155098
hsa-miR-192-5p	1766.27	797.924	2298	1093.1	1944	2267.46	3826	1239.41	1675	1498.74	3216	3078.31	3176	2961.74	2951	2997.95	5384	2875.16	3471	4544.54	11178	1379.33	3291.54	-2.55268	-1.35201	1.99506e-06	1.09496e-05
hsa-miR-30b-5p	438.714	298.722	860	315.646	561	343.393	579	357.658	483	433.569	930	961.819	992	562.444	560	1461.81	2625	677.896	818	786.863	1935	349.798	890.166	-2.4526	-1.29431	1.09913e-05	5.20436e-05
hsa-miR-194-5p	290.359	161.251	464	209.4	372	374.207	631	185.302	250	265.826	570	560.617	578	476.146	474	496.364	891	489.89	591	774.26	1904	239.197	559.455	-2.44361	-1.28901	5.98818e-06	3.02831e-05
hsa-miR-6873-3p	2.19733	1.56217	4	1.40537	2	2.07399	3	0.369864	0	1.63084	3	4.36089	4	3.51214	3	1.94871	3	3.72698	4	2.64253	6	1.40845	3.23825	-2.42742	-1.27942	0.0093653	0.0200793
hsa-miR-26b-3p	68.172	74.4636	214	66.0524	117	48.2943	81	49.1919	66	40.7709	87	134.219	138	97.8382	97	145.04	260	120.506	145	167.699	412	55.7546	133.06	-2.42429	-1.27756	1.15223e-05	5.29728e-05
hsa-miR-664b-5p	2.62098	0.867874	2	0.843222	1	2.07399	3	2.58905	3	3.02869	6	4.36089	4	6.52255	6	3.61903	6	1.24233	1	6.30141	15	1.88057	4.40924	-2.40547	-1.26632	0.0169363	0.0334942
hsa-miR-140-5p	1903.07	1528.67	4403	1509.09	2684	1577.12	2661	1340.02	1811	1354.29	2906	3179.09	3280	2918.59	2908	3321.99	5966	3362.15	4059	4478.68	11016	1461.84	3452.1	-2.36326	-1.24078	2.19505e-08	2.07213e-07
hsa-let-7a-5p	42062.4	22440.6	64642	26166.6	46547	19825.3	33456	21039	28441	20615.4	44243	55636.8	57411	49216.6	49046	43257.1	77692	52410	63280	58556.6	144035	22017.4	51815.4	-2.35217	-1.23399	4.12518e-10	6.49602e-09
hsa-miR-1287-5p	59.1895	49.4688	142	43.0043	76	35.8504	60	50.6713	68	47.7602	102	120.651	124	79.7758	79	104.952	188	99.8002	120	122.979	302	45.351	105.632	-2.33623	-1.22418	1.60788e-05	6.94133e-05
hsa-miR-1301-3p	82.3385	71.3393	205	48.0637	85	51.2572	86	43.2741	58	45.4304	97	138.095	142	107.873	107	145.04	260	94.0026	113	110.376	271	51.8729	119.077	-2.28516	-1.19229	6.47561e-05	0.000232728
hsa-miR-27a-3p	23424.5	22401.4	64529	17131.2	30474	17455.6	29457	15332	20726	19116.9	41027	35887.7	37032	35281.5	35159	43325.1	77814	36241.5	43758	55939.3	137597	18287.4	41335	-2.25963	-1.17609	6.1398e-09	6.79215e-08
hsa-miR-30b-3p	14.022	9.19947	26	17.1455	30	10.3699	17	9.98632	13	8.62013	18	23.7426	24	17.5607	17	24.2197	43	30.2299	36	24.1893	59	11.0643	23.9884	-2.24014	-1.16359	0.000383934	0.00117673
hsa-miR-222-3p	2360.43	2040.37	5877	1449.5	2578	1103.07	1861	942.783	1274	1566.77	3362	2986.24	3081	3551.78	3539	4629.85	8315	2130.59	2572	2735.02	6727	1420.5	3206.7	-2.23456	-1.15999	1.73811e-05	7.3249e-05
hsa-miR-326	9.6765	5.38082	15	2.52967	4	9.18481	15	4.80823	6	12.3478	26	17.9281	18	8.52948	8	17.5384	31	10.3527	12	12.8061	31	6.85026	13.431	-2.17098	-1.11835	0.00528753	0.012274
hsa-miR-660-5p	43.1519	24.1269	69	27.2642	48	33.4801	56	32.1782	43	33.3156	71	59.5989	61	49.6717	49	78.7835	141	51.7636	62	71.3482	175	30.073	62.2332	-2.10068	-1.07086	0.00022548	0.00072895
hsa-miR-197-3p	783.962	652.121	1878	724.89	1289	462.5	780	595.111	804	852.461	1829	1128.5	1164	1041.1	1037	1700.67	3054	1338.81	1616	1576.78	3878	657.416	1357.17	-2.08766	-1.06188	1.3056e-05	5.85041e-05
hsa-miR-548h-3p	4.59543	4.68652	13	3.09181	5	2.07399	3	2.58905	3	4.89251	10	7.26815	7	6.52255	6	6.95967	12	7.03985	8	7.1145	17	3.46678	6.98094	-2.07826	-1.05538	0.0114271	0.0237255
hsa-miR-548z	4.59543	4.68652	13	3.09181	5	2.07399	3	2.58905	3	4.89251	10	7.26815	7	6.52255	6	6.95967	12	7.03985	8	7.1145	17	3.46678	6.98094	-2.07826	-1.05538	0.0114271	0.0237255
hsa-miR-3074-5p	1442.74	1406.48	4051	1400.03	2490	1349.57	2277	987.167	1334	1568.63	3366	2102.43	2169	1770.62	1764	3279.12	5889	2921.54	3527	3690.8	9078	1342.38	2752.9	-2.03142	-1.02249	0.00409592	0.00979701
hsa-miR-15a-5p	147.128	199.785	575	107.089	190	133.032	224	96.5345	130	122.779	263	292.18	301	190.157	189	366.079	657	215.751	260	266.489	655	131.844	266.131	-2.0231	-1.01657	0.000113984	0.00038429
hsa-miR-659-5p	6.86955	2.25647	6	5.34041	9	7.4071	12	4.0685	5	9.55203	20	9.20633	9	11.5399	11	6.4029	11	7.86806	9	17.2781	42	5.7249	10.459	-2.01705	-1.01225	0.0255015	0.0477648
hsa-let-7g-5p	81422	72388.9	208523	67009.5	119202	61896.4	104454	63362.5	85656	73601.2	157958	145652	150298	109681	109301	131682	236508	134687	162622	162768	400370	67651.7	136894	-2.01045	-1.00752	1.33111e-08	1.36584e-07
hsa-miR-30d-3p	36.2029	36.2771	104	30.0749	53	28.7396	48	31.4384	42	31.9178	68	56.6916	58	57.6994	57	55.399	99	74.1254	89	76.2267	187	31.6896	64.0284	-2.0099	-1.00713	8.14588e-05	0.00028693
hsa-miR-142-5p	11674.1	13864.6	39938	10935.7	19453	11009	18578	8866.01	11985	11527.4	24739	25068.8	25868	17596.3	17535	22825.8	40996	20215.5	24408	27388.6	67369	11240.6	22619	-2.00941	-1.00677	1.97869e-07	1.36011e-06
hsa-miR-598-3p	115.121	92.1682	265	106.527	189	114.069	192	98.0139	132	99.4809	213	225.313	232	147.008	146	266.416	478	183.45	221	201.035	494	102.052	204.645	-1.99219	-0.994352	1.59008e-05	6.90662e-05
hsa-miR-3912-3p	16.585	13.7124	39	17.1455	30	14.5179	24	9.2466	12	18.4051	39	19.8663	20	20.5711	20	40.3661	72	30.2299	36	33.1332	81	14.6055	28.8333	-1.98793	-0.991264	0.00135526	0.00359373
hsa-miR-548j-5p	35.2079	30.7227	88	32.8857	58	33.4801	56	22.5617	30	21.2009	45	49.908	51	44.6544	44	56.5125	101	67.4997	81	54.68	134	28.1702	54.6509	-1.96135	-0.971848	0.00102594	0.00283736
hsa-miR-199b-5p	31.9587	11.6295	33	26.1399	46	28.147	47	17.3836	23	20.269	43	23.7426	24	173.098	172	28.6738	51	36.8557	44	23.3762	57	20.7138	57.1493	-1.95236	-0.96522	0.023888	0.0448613
hsa-miR-23a-5p	21.818	7.81087	22	11.524	20	15.7031	26	9.2466	12	11.4158	24	29.5572	30	28.5989	28	21.9926	39	13.6656	16	16.8715	41	11.1401	22.1371	-1.94105	-0.956841	0.00880841	0.0190714
hsa-miR-590-3p	149.253	132.09	380	157.683	280	137.772	232	110.589	149	173.567	372	248.571	256	228.289	227	314.299	564	240.597	290	317.713	781	142.34	269.894	-1.9136	-0.936293	5.86176e-05	0.000213924
hsa-miR-10a-5p	6227.35	5497.64	15836	2264.61	4028	5459.63	9213	3306.21	4469	8009.96	17190	10646.9	10986	6265.16	6243	4932.18	8858	4916.71	5936	26007.1	63971	4907.61	10553.6	-1.91295	-0.935802	0.0193469	0.0375276
hsa-miR-152-3p	325.748	258.453	744	284.728	506	268.73	453	241.521	326	360.415	773	678.846	700	397.875	396	540.906	971	458.418	553	623.027	1532	282.769	539.814	-1.90036	-0.926271	5.30568e-05	0.000194633
hsa-miR-619-5p	12.1395	8.15802	23	11.524	20	8.59224	14	4.80823	6	5.35846	11	21.8045	22	11.5399	11	20.879	37	15.322	18	7.52104	18	7.6882	15.4133	-1.88992	-0.918323	0.0146941	0.0296394
hsa-miR-363-5p	31.4479	33.1528	95	18.832	33	29.3321	49	19.6028	26	23.0647	49	41.1862	42	45.6578	45	42.0364	75	45.1378	54	52.2407	128	24.7969	45.2518	-1.84979	-0.887364	0.00638147	0.0143431
hsa-miR-148b-3p	1905.07	1668.23	4805	1726.64	3071	1817.7	3067	1675.11	2264	1928.81	4139	3266.31	3370	2456.99	2448	3159.41	5674	2897.52	3498	3618.03	8899	1763.3	3079.65	-1.7489	-0.80645	2.94013e-06	1.54194e-05
hsa-let-7i-3p	110.6	141.116	406	101.468	180	111.107	187	76.5618	103	102.277	219	156.508	161	176.109	175	226.329	406	161.088	194	194.937	479	106.506	182.994	-1.72987	-0.790665	0.00150821	0.00398437
hsa-miR-29a-3p	10566.4	8430.7	24285	9953.68	17706	8760.23	14783	7576.66	10242	9282.01	19920	16519.5	17046	14201.6	14152	17702.9	31795	11669.2	14089	15709.4	38641	8800.66	15160.5	-1.71798	-0.780711	4.74923e-05	0.000176045
hsa-miR-576-5p	128.777	101.541	292	112.711	200	108.736	183	109.11	147	148.406	318	183.642	189	114.897	114	260.292	467	201.671	243	244.535	601	116.101	201.007	-1.71266	-0.776236	0.00389818	0.00936315
hsa-miR-505-3p	33.3878	35.93	103	32.8857	58	35.8504	60	29.2192	39	37.0433	79	61.537	63	41.6439	41	55.399	99	55.0764	66	73.7875	181	34.1857	57.4888	-1.67145	-0.741102	0.015428	0.0309435
hsa-miR-374a-5p	313.408	331.702	955	316.208	562	365.911	617	291.083	393	349.232	749	506.348	522	432.997	431	593.242	1065	479.124	578	601.48	1479	330.827	522.638	-1.58235	-0.662069	0.000703048	0.00203166
hsa-miR-589-5p	81.3501	79.3237	228	58.1823	103	82.0707	138	52.1508	70	87.8321	188	104.177	107	81.7827	81	133.347	239	101.457	122	123.386	303	71.9119	108.83	-1.52823	-0.61186	0.00582573	0.0132199
hsa-miR-3529-3p	10359.4	9988.02	28771	8537.62	15187	6249.52	10546	6213.34	8399	9447.89	20276	11650.9	12022	11547.4	11507	12899.6	23168	11442.2	13815	13004.3	31987	8087.28	12108.9	-1.5153	-0.599603	0.000223621	0.000726256
hsa-miR-3184-3p	2099.94	1472.09	4240	1765.43	3140	1469.87	2480	1591.52	2151	1633.86	3506	1884.39	1944	2569.38	2560	1810.91	3252	2190.22	2644	2407.75	5922	1586.55	2172.53	-1.36225	-0.445997	0.00805807	0.0177177
hsa-miR-423-5p	2099.94	1472.09	4240	1765.43	3140	1469.87	2480	1591.52	2151	1633.86	3506	1884.39	1944	2569.38	2560	1810.91	3252	2190.22	2644	2407.75	5922	1586.55	2172.53	-1.36225	-0.445997	0.00805807	0.0177177
hsa-miR-3184-5p	407.617	339.339	977	336.446	598	269.322	454	311.795	421	368.802	791	406.532	419	428.983	427	328.775	590	474.983	573	594.569	1462	325.141	446.768	-1.3594	-0.442974	0.0156924	0.0313848
hsa-miR-142-3p	21304.8	22477.8	64749	23095.6	41084	27789.4	46896	22921.6	30986	27179.3	58330	31092.7	32084	23832.9	23750	34648.3	62230	29341.7	35427	41677.3	102516	24692.7	32118.6	-1.30426	-0.383234	0.00931428	0.0200441
hsa-miR-30e-3p	1325.71	1218.32	3509	1531.01	2723	1399.35	2361	1459.85	1973	1570.96	3371	1675.07	1728	1488.65	1483	1805.34	3242	1782.74	2152	2309.37	5680	1435.9	1812.23	-1.27131	-0.346313	0.0259728	0.0485191
hsa-let-7f-5p	94431.4	75399	217194	92789.6	165062	79028.8	133366	82668.6	111755	86307.8	185228	106974	110386	77424.1	77156	97111.6	174418	103849	125388	125499	308698	83238.7	102172	-1.21707	-0.283414	0.0226471	0.042872
hsa-let-7d-5p	6207.98	3532.77	10176	5255.8	9349	4375.23	7383	4106.6	5551	4334.99	9303	2960.08	3054	3507.62	3495	2912.21	5230	3266.07	3943	3087.49	7594	4321.08	3146.69	1.36292	0.446702	0.00213749	0.00546334
hsa-miR-484	1608.64	3450.15	9938	1933.51	3439	1584.23	2673	1311.17	1772	1506.19	3232	1476.4	1523	1249.82	1245	1293.11	2322	1142.53	1379	1428.39	3513	1957.05	1318.05	1.41965	0.505533	0.0179367	0.0352715
hsa-miR-363-3p	13015.2	20660.1	59513	11876.2	21126	16075.5	27128	14431	19508	21270.1	45648	11262.2	11621	7944.96	7917	15874.5	28511	9747.7	11769	14139.3	34779	16862.6	11793.7	1.42911	0.51512	0.0058938	0.0133317
hsa-miR-421	130.206	119.246	343	152.061	270	141.92	239	120.945	163	155.861	334	81.8879	84	101.852	101	86.0215	154	100.628	121	106.311	261	138.007	95.3402	1.44179	0.527865	0.0113397	0.0236829
hsa-miR-3613-5p	534.059	741.685	2136	646.189	1149	850.039	1434	677.221	915	749.485	1608	478.245	493	327.633	326	456.833	820	616.608	744	661.648	1627	732.924	508.193	1.46394	0.549854	0.00481876	0.0113723
hsa-let-7d-3p	855.769	484.447	1395	964.365	1715	689.453	1163	820.728	1109	765.328	1642	356.14	367	594.555	592	411.177	738	550.35	664	559.199	1375	744.864	494.284	1.48164	0.567194	0.0096422	0.0205623
hsa-miR-1307-3p	515.87	643.095	1852	503.966	896	518.201	874	520.398	703	631.599	1355	381.336	393	327.633	326	386.679	694	357.376	431	433.984	1067	563.452	377.402	1.48916	0.574496	0.00100589	0.00279282
hsa-let-7i-5p	37536.8	52334.4	150754	42092.2	74877	45062.2	76045	42565.8	57542	45976.7	98672	24986.5	25783	27866.8	27770	34563.1	62077	29075.8	35106	32284.6	79412	45606.3	29755.4	1.52931	0.612878	2.01019e-05	8.27451e-05
hsa-miR-652-3p	153.843	97.0283	279	207.152	368	212.436	358	228.946	309	171.238	367	98.3624	101	127.942	127	140.585	252	94.8309	114	105.498	259	183.36	113.444	1.53596	0.619144	0.013495	0.0273766
hsa-miR-425-5p	964.507	942.685	2715	1541.69	2742	1078.18	1819	1194.29	1614	1457.73	3128	795.136	820	727.013	724	756.377	1358	736.699	889	918.177	2258	1242.92	786.68	1.54543	0.628012	0.000554565	0.00164972
hsa-miR-6842-3p	39.0808	39.4015	113	54.8094	97	43.5538	73	52.8905	71	80.8428	173	33.4335	34	22.578	22	30.3442	54	38.5121	46	45.3295	111	54.2996	34.0395	1.55054	0.632775	0.0218181	0.0416367
hsa-miR-181a-3p	955.438	1422.45	4097	1255	2232	1606.75	2711	1659.58	2243	1856.59	3984	830.992	857	591.545	589	706.267	1268	1261.79	1523	1644.26	4044	1560.07	1006.97	1.6199	0.695902	0.00259825	0.00659341
hsa-miR-19a-3p	435.298	503.888	1451	624.828	1111	570.347	962	561.083	758	629.735	1351	272.798	281	268.428	267	390.02	700	389.676	470	456.751	1123	577.976	355.535	1.63007	0.704931	0.00156536	0.00410471
hsa-miR-1278	58.3687	82.4481	237	93.0355	165	56.5903	95	87.6577	118	114.857	246	48.9389	50	43.6509	43	45.9338	82	55.0764	66	66.8763	164	86.9178	52.0953	1.63134	0.706056	0.00323711	0.00809849
hsa-miR-221-3p	4864.23	5420.57	15614	5366.55	9546	5530.14	9332	4836.71	6538	6019.88	12919	3986.34	4113	2655.68	2646	3728.99	6697	2598.53	3137	3803.41	9355	5434.77	3354.59	1.63427	0.708646	7.82343e-05	0.000276949
hsa-miR-1273h-3p	78.4181	139.381	401	63.8038	113	59.5531	100	72.8632	98	104.14	223	60.568	62	51.6786	51	44.2635	79	41.825	50	62.8108	154	87.9482	52.2292	1.64113	0.714686	0.0106392	0.0225526
hsa-miR-4473	23.0267	41.1372	118	26.1399	46	21.6287	36	26.2603	35	31.4518	67	16.959	17	17.5607	17	10.8571	19	16.1502	19	25.0024	61	29.3236	17.3059	1.72483	0.786451	0.00866077	0.0188093
hsa-miR-3934-5p	23.4548	19.2668	55	21.0806	37	16.2956	27	10.7261	14	23.0647	49	8.23724	8	11.5399	11	14.7545	26	7.86806	9	9.55375	23	18.0867	10.3907	1.74492	0.803161	0.0115282	0.0238655
hsa-miR-33a-5p	43.8679	75.8522	218	70.5496	125	84.441	142	62.507	84	65.4664	140	39.248	40	26.5919	26	40.9229	73	52.5918	63	46.5491	114	71.7632	41.1807	1.75803	0.813961	0.00310272	0.00778981
hsa-miR-103a-3p	5192.6	6716.13	19346	8018.76	14264	7546.06	12734	7356.22	9944	7909.32	16974	4612.37	4759	3016.93	3006	4576.4	8219	3732.36	4506	4952.71	12182	7509.3	4178.15	1.79776	0.846198	1.12467e-05	5.20436e-05
hsa-miR-103b	5192.6	6716.13	19346	8018.76	14264	7546.06	12734	7356.22	9944	7909.32	16974	4612.37	4759	3016.93	3006	4576.4	8219	3732.36	4506	4952.71	12182	7509.3	4178.15	1.79776	0.846198	1.12467e-05	5.20436e-05
hsa-miR-642a-5p	46.6748	89.391	257	87.414	155	54.8126	92	74.3426	100	103.209	221	73.1661	75	32.6127	32	30.3442	54	47.6225	57	46.9557	115	81.8338	46.1402	1.85505	0.891455	0.00200977	0.00521216
hsa-let-7f-2-3p	500.767	588.939	1696	831.698	1479	749.303	1264	737.139	996	680.99	1461	415.254	428	229.293	228	264.189	474	449.308	542	633.597	1558	717.614	398.328	1.87723	0.908608	0.00072172	0.00207715
hsa-miR-181c-3p	22.4441	27.5984	79	34.01	60	27.5544	46	25.5206	34	31.9178	68	15.0209	15	25.5885	25	13.0842	23	7.86806	9	21.3435	52	29.3202	16.581	1.88758	0.916536	0.00353316	0.00866443
hsa-miR-454-5p	35.107	40.0958	115	43.0043	76	50.072	84	49.9316	67	40.7709	87	27.619	28	26.5919	26	18.6519	33	22.776	27	23.7827	58	44.7749	23.8843	1.89187	0.919811	0.000439678	0.00133031
hsa-miR-25-3p	7884.21	14201	40907	11532.8	20515	10523.1	17758	10645.1	14390	12409.5	26632	5802.41	5987	4417.77	4402	6825.21	12258	6240.2	7534	7976.98	19621	11862.3	6252.51	1.90397	0.929011	1.61339e-06	9.21194e-06
hsa-miR-3928-3p	11.038	12.3238	35	16.5834	29	12.1477	20	9.98632	13	8.62013	18	10.1754	10	4.51561	4	4.1758	7	7.86806	9	5.89487	14	11.9323	6.52595	1.9165	0.938472	0.00914767	0.0197456
hsa-miR-106b-5p	369.971	817.711	2355	618.082	1099	567.977	958	514.481	695	653.499	1402	351.294	362	208.22	207	459.06	824	286.977	346	338.853	833	634.35	328.881	1.96149	0.971951	3.68603e-05	0.000138168
hsa-miR-378d	6.31505	6.76942	19	7.02685	12	10.3699	17	6.28769	8	8.15418	17	2.42272	2	2.50867	2	3.61903	6	3.72698	4	7.1145	17	7.72162	3.87838	2.03324	1.02378	0.022263	0.0423288
hsa-miR-7705	4.80973	8.50517	24	8.15115	14	4.44426	7	7.02741	9	9.08608	19	6.29907	6	2.50867	2	4.1758	7	2.89876	3	3.04907	7	7.44281	3.78627	2.05492	1.03908	0.0112957	0.0236607
hsa-miR-185-3p	49.824	84.1838	242	65.4903	116	86.2187	145	79.5207	107	72.9216	156	31.4953	32	39.637	39	41.4796	74	34.371	41	39.2314	96	77.667	37.2429	2.07276	1.05155	3.50695e-05	0.00013349
hsa-miR-574-5p	16.1131	11.6295	33	8.7133	15	37.0355	62	21.0822	28	19.337	41	8.23724	8	12.5434	12	8.62999	15	5.38341	6	7.52104	18	19.5595	8.46301	2.09924	1.06987	0.0137318	0.0277774
hsa-miR-33b-3p	5.55609	10.9352	31	5.34041	9	6.22197	10	9.2466	12	10.4839	22	3.39181	3	3.51214	3	4.1758	7	2.89876	3	5.48833	13	8.44563	3.89337	2.12013	1.08415	0.00576166	0.0131166
hsa-miR-4448	17.4002	6.76942	19	5.34041	9	6.22197	10	4.80823	6	3.49465	7	6.29907	6	3.51214	3	2.50548	4	2.07054	2	1.01636	2	5.32693	3.08072	2.12144	1.08504	0.0164572	0.0326378
hsa-miR-98-5p	3073.93	1978.93	5700	3464.8	6163	3732.29	6298	3657.58	4944	3422.66	7345	1404.69	1449	1239.79	1235	1508.58	2709	1437.37	1735	1726.79	4247	3251.25	1463.44	2.13502	1.09425	9.45176e-06	4.61507e-05
hsa-miR-548aa	3.418	5.03367	14	5.90256	10	5.6294	9	4.80823	6	6.29036	13	1.45363	1	4.51561	4	2.50548	4	2.07054	2	2.64253	6	5.53284	2.63756	2.2357	1.16073	0.00541665	0.0124512
hsa-miR-548t-3p	3.418	5.03367	14	5.90256	10	5.6294	9	4.80823	6	6.29036	13	1.45363	1	4.51561	4	2.50548	4	2.07054	2	2.64253	6	5.53284	2.63756	2.2357	1.16073	0.00541665	0.0124512
hsa-miR-20a-3p	2.46068	3.64507	10	4.77826	8	3.85169	6	3.32877	4	3.02869	6	1.45363	1	1.5052	1	2.50548	4	2.07054	2	1.01636	2	3.7265	1.71024	2.27257	1.18433	0.00429837	0.0102122
hsa-miR-6724-5p	3.83722	3.64507	10	3.65396	6	6.22197	10	9.98632	13	6.75632	14	2.42272	2	0.501734	0	3.06226	5	4.55519	5	3.45561	8	6.05273	2.7995	2.33804	1.2253	0.0195353	0.0377896
hsa-miR-625-5p	55.2507	55.0232	158	68.8631	122	74.3673	125	43.2741	58	59.409	127	17.9281	18	20.5711	20	28.6738	51	29.4017	35	29.4743	72	60.1874	25.2098	2.34372	1.2288	0.000756552	0.00215983
hsa-let-7f-1-3p	78.9428	93.904	270	110.462	196	130.661	220	122.425	165	134.427	288	45.0626	46	42.6474	42	45.9338	82	55.0764	66	59.965	147	118.376	49.7371	2.34621	1.23033	7.96781e-06	3.9449e-05
hsa-miR-16-2-3p	503.401	777.442	2239	781.667	1390	822.781	1388	754.892	1020	670.273	1438	248.571	256	271.438	270	300.936	540	327.56	395	378.694	931	761.411	305.44	2.48711	1.31447	3.26699e-08	2.87326e-07
hsa-miR-3133	1.47239	1.90932	5	1.40537	2	1.48142	2	1.84932	2	3.49465	7	0.484544	0	0.501734	0	0.835161	1	1.24233	1	1.01636	2	2.02802	0.816024	2.49336	1.31809	0.00555506	0.0127281
hsa-miR-629-5p	355.342	261.577	753	434.822	773	326.209	550	302.179	408	329.662	707	68.3206	70	201.195	200	113.86	204	156.947	189	142.9	351	330.89	136.645	2.52362	1.33549	4.64504e-06	2.36596e-05
hsa-miR-219a-1-3p	3.00226	3.64507	10	4.21611	7	4.44426	7	5.54796	7	2.09679	4	3.39181	3	2.50867	2	1.39193	2	1.24233	1	0.609814	1	3.99004	1.82891	2.5339	1.34136	0.0181406	0.0354794
hsa-miR-449a	1.67886	2.95077	8	1.96752	3	3.25913	5	1.84932	2	2.09679	4	0.484544	0	0.501734	0	1.94871	3	1.24233	1	1.01636	2	2.4247	1.03873	2.57627	1.36528	0.00486245	0.0114373
hsa-miR-98-3p	12.1244	7.11657	20	19.3941	34	18.6659	31	15.1644	20	12.3478	26	5.32998	5	2.50867	2	9.18677	16	2.89876	3	7.92758	19	14.5378	5.57035	2.57775	1.36611	0.0186498	0.0362988
hsa-miR-3158-3p	12.9674	15.101	43	19.3941	34	13.9254	23	27.7398	37	29.1221	62	8.23724	8	3.51214	3	6.95967	12	9.5245	11	11.5865	28	21.0565	7.964	2.59168	1.37389	0.00335109	0.00835413
hsa-miR-15b-3p	146.94	177.914	512	230.762	410	176.289	297	230.425	311	195.467	419	66.3825	68	65.7272	65	87.1351	156	77.4383	93	85.9838	211	202.172	76.5334	2.60096	1.37905	1.7597e-07	1.24587e-06
hsa-miR-20b-3p	9.28094	19.614	56	5.90256	10	15.7031	26	14.4247	19	12.3478	26	3.39181	3	3.51214	3	5.28935	9	5.38341	6	7.1145	17	13.5984	4.93824	2.61773	1.38832	0.000923729	0.0025748
hsa-miR-449c-5p	1.81468	2.95077	8	0.843222	1	2.66656	4	1.10959	1	0.698929	1	0.484544	0	0.501734	0	0.278387	0	0.414109	0	1.4229	3	1.65381	0.620335	2.62693	1.39338	0.0186621	0.0362988
hsa-miR-378c	256.741	210.893	607	290.912	517	218.361	368	346.562	468	317.081	680	139.064	143	84.7931	84	62.637	112	108.911	131	139.241	342	276.762	106.929	2.63397	1.39724	1.35877e-05	6.02469e-05
hsa-miR-8485	4.07474	3.64507	10	2.52967	4	2.07399	3	9.2466	12	4.42655	9	2.42272	2	1.5052	1	2.50548	4	0.414109	0	1.4229	3	4.38438	1.65408	2.6444	1.40294	0.0162661	0.0323494
hsa-miR-942-5p	60.3218	69.2564	199	57.058	101	31.7024	53	36.6165	49	47.7602	102	19.8663	20	25.5885	25	10.8571	19	18.6349	22	18.0911	44	48.4787	18.6076	2.70288	1.4345	2.94207e-05	0.00011445
hsa-miR-21-5p	123935	186708	537832	208943	371687	191946	323922	179699	242925	222632	477798	72945.6	75272	81082.8	80802	78027.1	140141	67655.8	81688	66022.7	162400	197986	73146.8	2.71036	1.43849	8.17144e-13	2.62972e-11
hsa-miR-766-3p	151.064	140.075	403	233.573	415	316.728	534	238.562	322	283.532	608	64.4443	66	70.7445	70	149.494	268	75.7819	91	80.2922	197	242.494	88.1513	2.72446	1.44597	0.00010978	0.000371888
hsa-miR-940	2.50858	1.56217	4	3.09181	5	2.07399	3	3.32877	4	3.02869	6	0.484544	0	0.501734	0	3.06226	5	1.24233	1	0.609814	1	2.61709	1.18013	2.7335	1.45075	0.0112201	0.0235722
hsa-miR-296-5p	21.3774	21.3497	61	48.6258	86	45.3315	76	31.4384	42	25.8604	55	16.959	17	6.52255	6	10.8571	19	9.5245	11	16.8715	41	34.5212	12.1469	2.74455	1.45657	0.000374041	0.0011514
hsa-miR-331-5p	16.3779	19.614	56	16.0212	28	20.4436	34	26.2603	35	27.2582	58	12.1136	12	5.51908	5	11.4139	20	13.6656	16	3.45561	8	21.9195	9.23354	2.75642	1.4628	0.00126097	0.00338168
hsa-miR-130b-5p	119.129	176.526	508	163.304	290	110.514	186	167.548	226	190.808	409	43.1244	44	43.6509	43	40.3661	72	68.3279	82	100.213	246	161.74	59.1364	2.81771	1.49452	1.65401e-05	7.03521e-05
hsa-miR-16-1-3p	4.18891	11.6295	33	5.90256	10	9.18481	15	7.76714	10	4.42655	9	2.42272	2	2.50867	2	1.94871	3	2.07054	2	3.86216	9	7.78211	2.56256	2.95293	1.56215	0.000880234	0.00249282
hsa-miR-4504	3.03239	6.42227	18	3.65396	6	5.03683	8	2.58905	3	6.29036	13	1.45363	1	1.5052	1	0.835161	1	2.89876	3	1.82944	4	4.79849	1.70444	2.98805	1.5792	0.00133433	0.00355152
hsa-miR-106b-3p	1478.14	2923.52	8421	2601.34	4627	2128.8	3592	1942.16	2625	2370.07	5086	828.085	854	531.337	529	881.094	1582	769.828	929	981.597	2414	2393.18	798.388	3.01147	1.59047	5.84665e-09	6.57052e-08
hsa-miR-642a-3p	35.3783	28.6398	82	63.2417	112	32.8875	55	43.2741	58	40.3049	86	17.9281	18	10.5364	10	10.8571	19	16.1502	19	12.3996	30	41.6696	13.5743	3.02639	1.5976	1.12348e-05	5.20436e-05
hsa-miR-642b-5p	35.3783	28.6398	82	63.2417	112	32.8875	55	43.2741	58	40.3049	86	17.9281	18	10.5364	10	10.8571	19	16.1502	19	12.3996	30	41.6696	13.5743	3.02639	1.5976	1.12348e-05	5.20436e-05
hsa-miR-548u	15.7059	32.1113	92	18.832	33	27.5544	46	29.2192	39	37.0433	79	8.23724	8	8.52948	8	6.95967	12	7.86806	9	16.0584	39	28.952	9.53058	3.0418	1.60492	2.38552e-05	9.5963e-05
hsa-miR-106a-5p	1163.77	2390.3	6885	1224.64	2178	1902.44	3210	1385.14	1872	2120.78	4551	661.402	682	276.456	275	872.186	1566	512.252	618	733.2	1803	1804.66	611.099	3.04451	1.60621	5.19542e-07	3.23488e-06
hsa-miR-345-5p	68.8026	99.1112	285	84.0411	149	98.6626	166	97.2742	131	74.3195	159	34.4026	35	58.7029	58	39.2525	70	20.2913	24	16.8715	41	90.6817	33.9042	3.05069	1.60914	6.82171e-06	3.42537e-05
hsa-miR-106a-3p	1.3217	1.90932	5	0.281074	0	0.888853	1	2.58905	3	1.16488	2	0.484544	0	0.501734	0	0.278387	0	0.414109	0	0.203271	0	1.36664	0.376409	3.06196	1.61446	0.010714	0.0226433
hsa-miR-15b-5p	596.211	1191.24	3431	1096.47	1950	1120.25	1890	1051.52	1421	1327.73	2849	360.016	371	228.289	227	535.338	961	334.186	403	463.255	1139	1157.44	384.217	3.08009	1.62297	3.13666e-08	2.84712e-07
hsa-miR-17-3p	51.7866	79.3237	228	96.9706	172	86.8113	146	79.5207	107	81.7747	175	27.619	28	19.5676	19	37.5822	67	21.9478	26	29.8809	73	84.8802	27.3195	3.11363	1.6386	1.55139e-06	9.00314e-06
hsa-miR-744-3p	12.8237	16.1425	46	30.6371	54	23.999	40	18.1233	24	19.803	42	5.32998	5	7.52601	7	6.95967	12	6.21163	7	7.52104	18	21.741	6.70967	3.12272	1.6428	1.12268e-05	5.20436e-05
hsa-miR-7706	71.3369	97.3755	280	104.841	186	86.2187	145	122.425	165	92.9576	199	30.5262	31	39.637	39	21.4358	38	26.9171	32	45.3295	111	100.763	32.7691	3.12843	1.64544	3.36069e-07	2.20312e-06
hsa-miR-378a-5p	52.0255	36.6243	105	80.6683	143	64.8862	109	74.3426	100	70.5919	151	21.8045	22	15.5538	15	9.74354	17	29.4017	35	30.694	75	65.4227	21.4395	3.13819	1.64993	8.90754e-05	0.000312205
hsa-miR-944	1.26856	0.173575	0	1.96752	3	3.85169	6	2.58905	3	0.698929	1	0.484544	0	0.501734	0	0.278387	0	0.414109	0	0.203271	0	1.85615	0.376409	3.14415	1.65267	0.0236087	0.0444548
hsa-miR-195-5p	24.5617	61.2719	176	33.4478	59	45.3315	76	41.7946	56	38.9071	83	12.1136	12	11.5399	11	21.9926	39	8.69628	10	15.2453	37	44.1506	13.9175	3.1954	1.676	6.96294e-05	0.000248978
hsa-let-7e-3p	1.54896	0.173575	0	2.52967	4	2.66656	4	4.0685	5	1.63084	3	0.484544	0	0.501734	0	0.835161	1	0.414109	0	0.203271	0	2.21383	0.487764	3.21207	1.6835	0.0227912	0.0430299
hsa-miR-92a-3p	30896.7	31607.5	91048	36216.1	64424	33078.6	55822	31691.8	42842	32796.8	70386	8130.16	8389	7549.6	7523	12134	21793	10696.8	12915	13183.6	32428	33078.2	10338.8	3.21272	1.68379	1.67631e-10	3.15854e-09
hsa-miR-450a-2-3p	2.45748	1.56217	4	3.09181	5	3.85169	6	1.10959	1	1.63084	3	0.484544	0	0.501734	0	0.835161	1	0.414109	0	1.01636	2	2.24922	0.650381	3.21636	1.68543	0.00375677	0.0090778
hsa-miR-107	94.9212	154.655	445	170.05	302	189.918	320	177.905	240	169.374	363	45.0626	46	36.6266	36	59.8532	107	74.9536	90	54.68	134	172.38	54.2352	3.21637	1.68543	4.77938e-08	3.98094e-07
hsa-miR-6515-5p	2.52091	1.21502	3	4.21611	7	2.66656	4	2.58905	3	1.63084	3	1.45363	1	0.501734	0	0.278387	0	1.24233	1	0.609814	1	2.46351	0.817178	3.25565	1.70295	0.00812162	0.0177472
hsa-miR-191-3p	31.725	53.6346	154	50.3123	89	45.3315	76	58.0686	78	42.6347	91	11.1445	11	15.5538	15	9.18677	16	18.6349	22	24.5958	60	49.9963	15.8231	3.26637	1.70769	1.43502e-06	8.46661e-06
hsa-miR-3677-3p	1.78315	1.90932	5	4.21611	7	2.07399	3	1.10959	1	2.09679	4	0.484544	0	0.501734	0	0.835161	1	2.89876	3	0.203271	0	2.28116	0.984694	3.29095	1.71851	0.00711789	0.0158474
hsa-miR-92a-1-5p	102.764	99.1112	285	153.748	273	147.253	248	153.493	207	125.108	268	29.5572	30	32.6127	32	48.1609	86	49.2789	59	40.451	99	135.743	40.0121	3.3376	1.73881	3.38347e-08	2.92134e-07
hsa-miR-450a-1-3p	1.53466	0.173575	0	0.843222	1	3.25913	5	3.32877	4	2.09679	4	0.484544	0	0.501734	0	0.278387	0	0.414109	0	0.203271	0	1.9403	0.376409	3.38856	1.76067	0.0210537	0.0405055
hsa-miR-33a-3p	4.83896	7.46372	21	8.7133	15	16.2956	27	6.28769	8	8.15418	17	3.39181	3	0.501734	0	4.1758	7	3.72698	4	3.45561	8	9.3829	3.05039	3.43749	1.78136	0.000893493	0.00252029
hsa-miR-219b-5p	2.93399	3.99222	11	3.65396	6	5.03683	8	4.0685	5	2.09679	4	0.484544	0	0.501734	0	2.50548	4	0.414109	0	3.45561	8	3.76966	1.4723	3.4495	1.78639	0.00446748	0.0105785
hsa-miR-146a-5p	19281.7	12103.9	34866	10861	19320	14805	24984	11109.6	15018	12678.8	27210	4285.79	4422	2388.76	2380	4802.45	8625	3162.55	3818	3470.04	8535	12311.7	3621.92	3.45121	1.7871	1.73494e-09	2.19345e-08
hsa-miR-183-5p	17.286	5.03367	14	22.2049	39	22.8139	38	21.822	29	13.7456	29	4.36089	4	3.51214	3	3.61903	6	6.21163	7	3.45561	8	17.124	4.23186	3.49847	1.80673	0.00348483	0.00862677
hsa-miR-6505-5p	1.26212	0.520725	1	1.96752	3	0.888853	1	1.84932	2	2.09679	4	0.484544	0	0.501734	0	0.278387	0	0.414109	0	0.203271	0	1.46464	0.376409	3.56371	1.83338	0.00123189	0.00331627
hsa-miR-3688-3p	1.77824	1.21502	3	3.65396	6	1.48142	2	1.84932	2	3.9606	8	0.484544	0	0.501734	0	0.835161	1	2.07054	2	0.203271	0	2.43207	0.819051	3.61804	1.85521	0.00353574	0.00866443
hsa-miR-20b-5p	1780.28	4001.77	11527	2151.06	3826	3101.21	5233	2282.43	3085	3338.32	7164	852.312	879	453.066	451	1289.77	2316	603.356	728	947.448	2330	2974.96	829.19	3.6962	1.88604	1.29357e-08	1.34683e-07
hsa-miR-629-3p	8.58286	8.50517	24	13.7726	24	12.7402	21	12.2055	16	14.6775	31	1.45363	1	3.51214	3	4.73258	8	4.55519	5	3.04907	7	12.3802	3.46052	3.72052	1.8955	1.7818e-05	7.42067e-05
hsa-miR-378a-3p	3555.74	2068.84	5959	3976.35	7073	3580	6041	4366.98	5903	4305.64	9240	1067.45	1101	718.985	716	645.022	1158	1071.3	1293	1240.56	3051	3659.56	948.664	3.77902	1.91801	1.08778e-07	8.1931e-07
hsa-miR-30c-1-3p	37.7501	61.6191	177	68.301	121	55.9977	94	63.9864	86	63.6026	136	17.9281	18	13.5468	13	12.5274	22	15.322	18	23.7827	58	62.7014	16.6214	3.79434	1.92385	1.53401e-07	1.13133e-06
hsa-miR-3940-3p	8.95199	23.4326	67	15.4591	27	9.77738	16	11.4658	15	11.8818	25	4.36089	4	2.50867	2	3.06226	5	7.03985	8	3.04907	7	14.4033	4.00415	3.81466	1.93155	9.8511e-05	0.000340223
hsa-miR-148a-3p	7590.54	10411.2	29990	7929.38	14105	15797.6	26659	13696.4	18515	13272.9	28485	2015.22	2079	4740.89	4724	2754.64	4947	2395.62	2892	4178.24	10277	12221.5	3216.92	3.84944	1.94465	4.45539e-09	5.17118e-08
hsa-miR-18b-5p	15.9487	28.987	83	17.7077	31	36.443	61	23.3014	31	30.9859	66	3.39181	3	6.52255	6	19.2087	34	4.55519	5	6.70795	16	27.485	8.07724	3.88721	1.95874	1.957e-05	8.10265e-05
hsa-miR-3188	2.11404	1.21502	3	1.40537	2	2.66656	4	3.32877	4	1.63084	3	0.484544	0	0.501734	0	0.278387	0	2.07054	2	0.203271	0	2.04931	0.707696	3.90172	1.96411	0.00347289	0.00862677
hsa-miR-4477b	2.45827	1.56217	4	3.09181	5	2.07399	3	7.02741	9	3.49465	7	1.45363	1	0.501734	0	1.39193	2	1.24233	1	0.203271	0	3.45001	0.958579	3.94437	1.9798	0.00208066	0.00535676
hsa-miR-128-1-5p	6.10407	17.8782	51	9.27544	16	9.77738	16	12.2055	16	10.4839	22	5.32998	5	1.5052	1	3.61903	6	3.72698	4	2.23598	5	11.9241	3.28343	3.95072	1.98211	1.7593e-05	7.37034e-05
hsa-miR-4423-5p	1.64312	0.520725	1	2.52967	4	0.888853	1	2.58905	3	2.09679	4	0.484544	0	0.501734	0	0.278387	0	0.414109	0	0.203271	0	1.72502	0.376409	3.97554	1.99115	0.00121795	0.00330386
hsa-miR-597-3p	1.45947	0.867874	2	0.843222	1	2.07399	3	1.84932	2	2.09679	4	0.484544	0	0.501734	0	0.278387	0	0.414109	0	0.203271	0	1.54624	0.376409	3.97663	1.99154	0.000371545	0.00114871
hsa-miR-130b-3p	58.1884	65.7849	189	73.9225	131	69.0342	116	69.1645	93	87.3662	187	21.8045	22	13.5468	13	28.1171	50	12.8374	15	17.2781	42	73.0545	18.7168	3.99979	1.99992	6.7537e-08	5.3726e-07
hsa-miR-195-3p	22.2918	43.9144	126	21.0806	37	30.5173	51	18.8631	25	22.1328	47	4.36089	4	7.52601	7	5.28935	9	9.5245	11	7.52104	18	27.3016	6.84436	4.01436	2.00517	1.58456e-05	6.90662e-05
hsa-miR-4741	3.55847	3.64507	10	1.96752	3	1.48142	2	1.10959	1	2.09679	4	0.484544	0	0.501734	0	1.39193	2	0.414109	0	0.203271	0	2.06008	0.599118	4.01552	2.00559	0.000588547	0.00172904
hsa-miR-96-5p	4.90131	0.867874	2	5.90256	10	5.03683	8	9.2466	12	5.35846	11	0.484544	0	2.50867	2	0.835161	1	0.414109	0	1.82944	4	5.28246	1.21439	4.04128	2.01481	0.00938734	0.0200793
hsa-miR-3922-5p	1.86695	4.33937	12	1.40537	2	3.25913	5	1.84932	2	3.49465	7	0.484544	0	0.501734	0	0.278387	0	1.24233	1	1.4229	3	2.86957	0.785978	4.08737	2.03117	0.000479784	0.00144548
hsa-miR-942-3p	4.99929	9.19947	26	3.65396	6	5.03683	8	4.0685	5	6.75632	14	1.45363	1	0.501734	0	2.50548	4	2.07054	2	1.01636	2	5.74302	1.50955	4.24268	2.08498	0.000853303	0.00242626
hsa-miR-570-3p	3.60695	2.25647	6	4.21611	7	3.85169	6	7.02741	9	10.9499	23	0.484544	0	1.5052	1	1.94871	3	2.07054	2	0.609814	1	5.66032	1.32376	4.31353	2.10887	0.00117172	0.003203
hsa-miR-548am-3p	4.22311	3.29792	9	4.21611	7	5.6294	9	4.0685	5	7.68822	16	0.484544	0	0.501734	0	3.06226	5	1.24233	1	1.4229	3	4.98003	1.34275	4.31805	2.11038	0.000617242	0.00179838
hsa-miR-149-5p	9.93775	14.7539	42	7.02685	12	13.3328	22	13.685	18	10.4839	22	2.42272	2	0.501734	0	4.73258	8	2.89876	3	5.08178	12	11.8565	3.12751	4.46645	2.15913	0.00010132	0.000346545
hsa-miR-4746-5p	13.8553	22.044	63	21.6427	38	12.1477	20	23.3014	31	25.3944	54	5.32998	5	4.51561	4	5.28935	9	2.89876	3	5.08178	12	20.906	4.6231	4.47575	2.16213	1.7871e-06	1.00418e-05
hsa-miR-548ay-5p	16.3669	27.2513	78	25.5777	45	24.5916	41	16.6439	22	17.4732	37	4.36089	4	0.501734	0	6.95967	12	12.8374	15	9.14721	22	22.3075	6.76137	4.5497	2.18577	0.0015374	0.0040464
hsa-miR-19b-1-5p	1.44227	1.21502	3	3.09181	5	0.888853	1	1.10959	1	3.02869	6	0.484544	0	0.501734	0	0.278387	0	0.414109	0	0.203271	0	1.8668	0.376409	4.60749	2.20398	0.000292332	0.000923978
hsa-miR-4479	1.99972	0.867874	2	2.52967	4	0.888853	1	3.32877	4	2.09679	4	0.484544	0	0.501734	0	0.278387	0	0.414109	0	0.203271	0	1.94239	0.376409	4.6563	2.21918	0.000397334	0.00121255
hsa-miR-497-5p	8.17917	17.5311	50	6.4647	11	18.6659	31	8.50687	11	12.8137	27	2.42272	2	1.5052	1	5.28935	9	2.89876	3	1.82944	4	12.7964	2.78909	4.77918	2.25676	1.24756e-05	5.67214e-05
hsa-miR-222-5p	14.5225	4.33937	12	14.8969	26	26.3693	44	27.7398	37	35.1794	75	1.45363	1	10.5364	10	8.07322	14	0.414109	0	6.30141	15	21.705	5.35576	4.96599	2.31208	0.00266066	0.00672767
hsa-miR-425-3p	45.9921	24.1269	69	74.4846	132	117.032	197	97.2742	131	88.764	190	16.959	17	13.5468	13	9.18677	16	12.8374	15	18.4977	45	80.3364	14.2055	4.9954	2.3206	3.68839e-05	0.000138168
hsa-miR-3164	1.54264	1.56217	4	4.21611	7	0.888853	1	1.84932	2	1.63084	3	0.484544	0	0.501734	0	0.278387	0	0.414109	0	0.203271	0	2.02946	0.376409	5.01094	2.32508	0.000183239	0.000603409
hsa-miR-93-5p	4404.2	7411.13	21348	7552.74	13435	8010.64	13518	6948.63	9393	7346.45	15766	1492.88	1540	944.766	941	1725.16	3098	1333.02	1609	1769.48	4352	7453.92	1453.06	5.1776	2.37228	9.21483e-13	2.83656e-11
hsa-miR-3662	1.35268	1.56217	4	0.843222	1	3.25913	5	1.84932	2	3.02869	6	0.484544	0	0.501734	0	0.278387	0	0.414109	0	0.203271	0	2.10851	0.376409	5.33397	2.41521	5.0503e-05	0.00018623
hsa-miR-182-5p	24.1688	11.6295	33	28.3885	50	32.8875	55	45.4933	61	17.9392	38	3.39181	3	11.5399	11	2.50548	4	10.3527	12	2.23598	5	27.2676	6.00518	5.33776	2.41624	2.83805e-05	0.00011163
hsa-miR-548ah-3p	7.91172	10.5881	30	10.3997	18	13.9254	23	13.685	18	16.0754	34	6.29907	6	3.51214	3	0.278387	0	3.72698	4	3.86216	9	12.9347	3.53575	5.3523	2.42016	0.000349547	0.00109022
hsa-miR-301a-5p	49.321	75.5051	217	87.9762	156	123.551	208	104.671	141	105.072	225	16.959	17	14.5503	14	17.5384	31	16.1502	19	21.75	53	99.3551	17.3896	5.54743	2.47182	6.92563e-09	7.54361e-08
hsa-miR-148a-5p	42.7855	66.132	190	53.123	94	105.181	177	96.5345	130	65.0004	139	9.20633	9	26.5919	26	8.07322	14	10.3527	12	17.2781	42	77.1942	14.3004	5.76701	2.52782	5.1611e-08	4.24891e-07
hsa-miR-625-3p	728.359	1044.4	3008	679.356	1208	1031.37	1740	807.413	1091	876.224	1880	186.549	192	105.866	105	182.9	328	209.125	252	112.002	275	887.752	159.289	5.78193	2.53155	1.68459e-11	3.61421e-10
hsa-miR-4461	1.67301	0.520725	1	1.40537	2	5.03683	8	6.28769	8	2.09679	4	0.484544	0	0.501734	0	0.278387	0	0.414109	0	0.203271	0	3.06948	0.376409	5.78489	2.53229	0.000411393	0.00125007
hsa-miR-93-3p	22.4205	35.2357	101	34.01	60	51.2572	86	33.6576	45	37.9752	81	5.32998	5	6.52255	6	10.3003	18	9.5245	11	3.45561	8	38.4271	7.02659	5.9662	2.57681	4.79769e-07	3.06015e-06
hsa-miR-1296-5p	5.83308	4.33937	12	7.02685	12	14.5179	24	5.54796	7	10.018	21	2.42272	2	0.501734	0	1.39193	2	2.89876	3	0.609814	1	8.29002	1.56499	6.10733	2.61054	2.34132e-05	9.47232e-05
hsa-miR-1270	5.34225	3.29792	9	5.34041	9	6.22197	10	4.0685	5	8.62013	18	0.484544	0	0.501734	0	1.39193	2	0.414109	0	2.23598	5	5.50979	1.00566	6.20745	2.634	0.000106756	0.00036338
hsa-miR-2276-3p	1.7801	1.90932	5	3.09181	5	3.25913	5	1.84932	2	4.42655	9	0.484544	0	0.501734	0	0.835161	1	0.414109	0	0.203271	0	2.90723	0.487764	6.27726	2.65014	7.0969e-06	3.53845e-05
hsa-miR-6753-3p	1.53419	2.95077	8	1.96752	3	2.07399	3	1.84932	2	2.56274	5	0.484544	0	0.501734	0	0.278387	0	0.414109	0	0.203271	0	2.28087	0.376409	6.43622	2.68621	2.11092e-06	1.14086e-05
hsa-miR-20a-5p	8053.22	9833.19	28325	12728.4	22642	13671.4	23071	11665.9	15770	12607.1	27056	1603.35	1654	1231.76	1227	2430.04	4364	1680.87	2029	2334.57	5742	12101.2	1856.12	6.53324	2.7078	8.08312e-12	1.78839e-10
hsa-miR-3187-3p	7.0323	1.90932	5	4.21611	7	7.4071	12	1.84932	2	2.09679	4	0.484544	0	0.501734	0	0.835161	1	0.414109	0	0.203271	0	3.49573	0.487764	6.6839	2.74069	2.65899e-05	0.000105762
hsa-miR-450a-5p	114.83	225.127	648	206.027	366	230.213	388	146.096	197	168.908	362	8.23724	8	199.189	198	21.4358	38	24.4324	29	26.222	64	195.274	55.9032	6.73884	2.7525	1.91925e-06	1.06159e-05
hsa-miR-301a-3p	10.2147	14.4067	41	16.0212	28	21.6287	36	27.0001	36	25.3944	54	2.42272	2	1.5052	1	3.06226	5	4.55519	5	3.45561	8	20.8902	3.0002	6.99029	2.80535	1.02801e-06	6.16807e-06
hsa-miR-3200-3p	2.10048	0.867874	2	5.34041	9	3.85169	6	3.32877	4	2.09679	4	0.484544	0	0.501734	0	0.278387	0	0.414109	0	0.203271	0	3.09711	0.376409	7.0914	2.82607	2.72822e-05	0.00010791
hsa-miR-1304-5p	8.54058	7.46372	21	7.02685	12	7.4071	12	15.9041	21	16.0754	34	2.42272	2	0.501734	0	0.835161	1	2.07054	2	1.82944	4	10.7754	1.53192	7.48655	2.9043	1.65944e-05	7.03521e-05
hsa-miR-26a-1-3p	1.6279	1.56217	4	1.96752	3	3.85169	6	3.32877	4	3.9606	8	0.484544	0	0.501734	0	0.278387	0	0.414109	0	0.203271	0	2.93415	0.376409	7.62681	2.93108	1.84989e-06	1.03128e-05
hsa-miR-155-3p	2.85031	2.95077	8	8.15115	14	5.03683	8	6.28769	8	5.82441	12	1.45363	1	0.501734	0	0.278387	0	1.24233	1	0.609814	1	5.65017	0.817178	7.74375	2.95303	4.38679e-06	2.25062e-05
hsa-miR-92b-5p	3.84238	2.25647	6	3.65396	6	2.07399	3	4.0685	5	2.56274	5	0.484544	0	0.501734	0	0.278387	0	0.414109	0	0.203271	0	2.92313	0.376409	7.86217	2.97493	1.11588e-05	5.20436e-05
hsa-miR-4659a-3p	5.45296	8.15802	23	7.589	13	10.3699	17	9.98632	13	8.15418	17	0.484544	0	1.5052	1	0.278387	0	2.07054	2	3.45561	8	8.85149	1.55886	7.92842	2.98703	6.4373e-05	0.000232531
hsa-miR-17-5p	2856.38	3532.77	10176	4592.47	8169	5166.9	8719	4404.71	5954	4737.11	10166	460.801	475	408.913	407	754.707	1355	525.504	634	657.583	1617	4486.79	561.502	7.97505	2.99549	5.02093e-12	1.36724e-10
hsa-miR-455-5p	5.44379	0.867874	2	4.77826	8	9.77738	16	9.98632	13	2.56274	5	0.484544	0	0.501734	0	0.835161	1	0.414109	0	0.203271	0	5.59452	0.487764	8.43383	3.07619	0.000179672	0.000597218
hsa-miR-1254	13.2434	17.8782	51	17.7077	31	7.4071	12	12.2055	16	20.7349	44	3.39181	3	0.501734	0	0.835161	1	2.89876	3	1.82944	4	15.1867	1.89138	9.73496	3.28317	6.6568e-07	4.09828e-06
hsa-miR-18a-3p	141.392	176.526	508	205.465	365	163.253	275	180.863	244	194.535	417	10.1754	10	17.5607	17	19.7655	35	16.9785	20	23.3762	57	184.128	17.5712	10.4875	3.3906	6.26363e-12	1.52919e-10
hsa-miR-18a-5p	270.953	332.396	957	406.714	723	485.61	819	430.891	582	417.727	896	30.5262	31	25.5885	25	56.5125	101	35.1992	42	39.2314	96	414.668	37.4116	11.0822	3.47017	6.0859e-12	1.52919e-10
hsa-miR-296-3p	31.7229	18.5725	53	26.1399	46	29.3321	49	24.0412	32	22.5987	48	3.39181	3	2.50867	2	0.835161	1	2.07054	2	3.04907	7	24.1369	2.37105	11.1189	3.47494	7.88458e-09	8.458e-08
hsa-miR-3143	6.11629	10.2409	29	12.0862	21	9.77738	16	5.54796	7	7.68822	16	1.45363	1	0.501734	0	1.39193	2	0.414109	0	0.609814	1	9.06813	0.874244	11.6448	3.54161	9.19693e-08	7.15542e-07
hsa-miR-21-3p	569.676	720.856	2076	895.783	1593	1018.33	1718	777.824	1051	978.734	2100	61.537	63	90.8139	90	77.1132	138	53.42	64	51.8342	127	878.305	66.9437	13.4305	3.74744	2.64583e-14	1.33803e-12
hsa-miR-652-5p	3.09993	3.99222	11	7.589	13	2.66656	4	11.4658	15	8.62013	18	0.484544	0	0.501734	0	0.835161	1	0.414109	0	0.203271	0	6.86674	0.487764	13.4828	3.75305	1.67071e-07	1.21342e-06
hsa-miR-301b-5p	3.3811	2.60362	7	5.34041	9	7.99967	13	5.54796	7	4.89251	10	0.484544	0	0.501734	0	0.278387	0	0.414109	0	0.203271	0	5.27683	0.376409	13.6305	3.76877	4.6917e-07	3.04316e-06
hsa-miR-450b-5p	47.6079	79.6709	229	85.1654	151	103.996	175	69.9043	94	95.7533	205	4.36089	4	55.6925	55	7.51645	13	2.07054	2	3.45561	8	86.8979	14.6192	13.7979	3.78638	6.13446e-08	4.93545e-07
hsa-miR-424-5p	42.0263	81.0595	233	80.6683	143	118.217	199	60.2878	81	87.8321	188	1.45363	1	33.6162	33	4.73258	8	4.55519	5	6.70795	16	85.613	10.2131	14.3646	3.84445	1.36041e-08	1.37596e-07
hsa-miR-92b-3p	196.856	103.971	299	159.931	284	182.215	307	178.644	241	184.75	396	13.0827	13	5.51908	5	18.6519	33	5.38341	6	12.8061	31	161.902	11.0886	15.2375	3.92956	9.0309e-10	1.22959e-08
hsa-miR-424-3p	135.17	179.65	517	163.304	290	178.067	300	124.644	168	123.245	264	1.45363	1	64.7237	64	8.62999	15	12.8374	15	8.33412	20	153.782	19.1958	16.007	4.00063	4.39537e-08	3.70467e-07
hsa-miR-542-3p	16.4825	38.7072	111	32.3235	57	31.7024	53	34.3973	46	30.9859	66	0.484544	0	19.5676	19	3.06226	5	0.414109	0	3.04907	7	33.6233	5.31552	16.1639	4.01471	9.73796e-07	5.94351e-06
hsa-miR-1304-3p	66.5901	72.3807	208	96.9706	172	113.477	191	98.7536	133	129.768	278	2.42272	2	2.50867	2	10.3003	18	9.5245	11	9.96029	24	102.27	6.9433	16.4134	4.0368	5.24273e-10	7.73302e-09
hsa-miR-146a-3p	20.6446	101.541	292	43.0043	76	25.1842	42	15.1644	20	12.3478	26	20.8354	21	7.52601	7	0.278387	0	1.24233	1	0.609814	1	39.4484	6.09838	16.8217	4.07225	9.55039e-05	0.000331455
hsa-miR-181d-5p	30.381	18.9197	54	33.4478	59	29.3321	49	49.9316	67	38.9071	83	0.484544	0	1.5052	1	4.1758	7	2.07054	2	2.64253	6	34.1077	2.17572	17.2646	4.10974	4.96326e-09	5.66772e-08
hsa-miR-196a-5p	40.4087	31.0699	89	96.4084	171	27.5544	46	29.959	40	53.3516	114	3.39181	3	8.52948	8	4.1758	7	4.55519	5	0.203271	0	47.6687	4.17111	18.4608	4.20639	1.53979e-06	9.00314e-06
hsa-miR-34c-5p	18.2227	39.0543	112	23.8913	42	31.1098	52	15.9041	21	22.5987	48	1.45363	1	2.50867	2	0.278387	0	2.89876	3	1.4229	3	26.5117	1.71247	20.1134	4.33008	5.36364e-08	4.36489e-07
hsa-miR-4425	39.7977	39.4015	113	59.8688	106	66.0714	111	72.8632	98	103.675	222	3.39181	3	1.5052	1	4.73258	8	2.07054	2	5.48833	13	68.3759	3.43769	20.1253	4.33094	4.69135e-10	7.2206e-09
hsa-miR-155-5p	67469.7	31631.4	91117	71897.3	127897	54732.3	92364	60853.3	82264	72573.3	155752	2274.93	2347	2532.25	2523	2648.85	4757	2046.11	2470	2241.07	5512	58337.5	2348.64	23.877	4.57755	1.03519e-15	1.46583e-13
hsa-miR-301b-3p	24.0592	19.2668	55	46.3772	82	59.5531	100	50.6713	68	59.409	127	1.45363	1	0.501734	0	1.39193	2	2.89876	3	3.45561	8	47.0555	1.94033	25.9296	4.69653	1.21651e-08	1.2855e-07
hsa-miR-210-5p	21.151	41.4844	119	46.9394	83	25.7767	43	38.8357	52	69.66	149	2.42272	2	2.50867	2	1.94871	3	0.414109	0	1.01636	2	44.5392	1.66211	31.3811	4.97182	2.49181e-10	4.4105e-09
hsa-miR-34a-5p	62.2117	65.0906	187	141.38	251	108.736	183	174.206	235	124.176	266	10.1754	10	1.5052	1	1.94871	3	5.38341	6	3.86216	9	122.718	4.57498	32.038	5.00171	2.9783e-09	3.63558e-08
hsa-miR-4518	13.9954	32.4585	93	15.4591	27	50.6646	85	40.3152	54	50.5559	108	1.45363	1	0.501734	0	0.835161	1	2.07054	2	0.609814	1	37.8906	1.09418	37.4921	5.22851	1.36018e-09	1.817e-08
hsa-miR-7974	9.9107	23.7798	68	5.90256	10	35.2578	59	24.7809	33	30.054	64	0.484544	0	0.501734	0	0.278387	0	2.07054	2	0.203271	0	23.955	0.707696	43.54	5.44427	9.77554e-08	7.52292e-07
hsa-miR-503-5p	103.765	145.629	419	120.581	214	167.401	282	97.2742	131	132.564	284	1.45363	1	5.51908	5	1.94871	3	1.24233	1	3.86216	9	132.69	2.80518	54.6428	5.77196	6.65418e-13	2.26869e-11
hsa-miR-210-3p	820.545	1368.64	3942	1653	2940	1412.39	2383	1576.73	2131	1850.07	3970	20.8354	21	14.5503	14	26.4468	47	23.6042	28	23.7827	58	1572.16	21.8439	71.4538	6.15894	1.11901e-18	3.96129e-16
hsa-miR-124-5p	34.3188	98.0698	282	27.2642	48	112.292	189	69.1645	93	172.17	369	0.484544	0	0.501734	0	0.278387	0	0.414109	0	0.609814	1	95.792	0.457717	186.116	7.54006	5.11487e-10	7.70496e-09
hsa-miR-124-3p	88.2033	310.178	893	86.2897	153	220.732	372	119.466	161	332.923	714	0.484544	0	0.501734	0	0.278387	0	0.414109	0	1.4229	3	213.918	0.620335	359.702	8.49066	6.66113e-12	1.54432e-10

## Sheet: NKRESTvsNK-EVs
ID	AvrExp	Norm_Resting 1	Raw_Resting 1	Norm_Resting 2	Raw_Resting 2	Norm_Resting 3	Raw_Resting 3	Norm_Resting 4	Raw_Resting 4	Norm_Resting 5	Raw_Resting 5	Norm_NKEVS 1	Raw_NKEVS 1	Norm_NKEVS 2	Raw_NKEVS 2	Norm_NKEVS 3	Raw_NKEVS 3	Norm_NKEVS 4	Raw_NKEVS 4	Norm_NKEVS 5	Raw_NKEVS 5	ave_REST	ave_EXO	foldChange	logFC	P.Value	adj.P.Val
hsa-miR-122-5p	74.2525	0.484544	0	0.501734	0	0.278387	0	0.414109	0	0.203271	0	251.403	98	216.788	116	176.748	49	134.653	41	330.962	73	0.376409	222.11	-596.988	-9.22156	4.34148e-16	4.3911e-14
hsa-miR-10b-5p	90.0946	1.45363	1	0.501734	0	0.835161	1	2.89876	3	0.609814	1	396.884	155	324.716	174	176.748	49	199.545	61	245.407	54	1.25982	268.66	-262.582	-8.03662	3.50949e-14	1.55295e-12
hsa-miR-124-3p	88.2033	0.484544	0	0.501734	0	0.278387	0	0.414109	0	1.4229	3	82.9501	32	25.1213	13	33.9212	9	34.0687	10	74.2976	16	0.620335	50.0718	-81.7317	-6.35282	7.5277e-09	7.50649e-08
hsa-miR-503-5p	103.765	1.45363	1	5.51908	5	1.94871	3	1.24233	1	3.86216	9	218.222	85	131.189	70	223.166	62	173.588	53	132.835	29	2.80518	175.8	-71.072	-6.15121	4.36734e-13	1.51884e-11
hsa-miR-155-5p	67469.7	2274.93	2347	2532.25	2523	2648.85	4757	2046.11	2470	2241.07	5512	105437	41310	179691	96564	149919	41986	147831	45561	125736	27923	2348.64	141723	-59.98	-5.90641	1.04506e-17	3.69953e-15
hsa-miR-210-3p	820.545	20.8354	21	14.5503	14	26.4468	47	23.6042	28	23.7827	58	733.789	287	979.731	526	848.031	237	945.813	291	830.782	184	21.8439	867.629	-39.6338	-5.30866	9.57392e-17	1.35567e-14
hsa-miR-92b-3p	196.856	13.0827	13	5.51908	5	18.6519	33	5.38341	6	12.8061	31	177.386	69	507.078	272	487.395	136	517.52	159	398.505	88	11.0886	417.577	-37.777	-5.23943	7.60626e-12	1.85698e-10
hsa-miR-3187-3p	7.0323	0.484544	0	0.501734	0	0.835161	1	0.414109	0	0.203271	0	8.93308	3	19.5388	10	12.4973	3	24.3348	7	20.263	4	0.487764	17.1134	-36.5336	-5.19115	1.58679e-09	1.81201e-08
hsa-miR-296-3p	31.7229	3.39181	3	2.50867	2	0.835161	1	2.07054	2	3.04907	7	47.2177	18	95.8331	51	62.4865	17	85.983	26	51.7832	11	2.37105	68.6607	-31.7315	-4.98784	2.53248e-11	4.71841e-10
hsa-miR-196a-5p	40.4087	3.39181	3	8.52948	8	4.1758	7	4.55519	5	0.203271	0	52.3224	20	101.416	54	44.6332	12	69.7598	21	78.8005	17	4.17111	69.3863	-29.3924	-4.87737	4.66789e-07	3.00442e-06
hsa-miR-181d-5p	30.381	0.484544	0	1.5052	1	4.1758	7	2.07054	2	2.64253	6	62.5316	24	45.5905	24	44.6332	12	69.7598	21	51.7832	11	2.17572	54.8597	-29.3827	-4.8769	7.97691e-10	9.73734e-09
hsa-miR-424-3p	135.17	1.45363	1	64.7237	64	8.62999	15	12.8374	15	8.33412	20	243.746	95	160.962	86	326.715	91	176.833	54	254.413	56	19.1958	232.534	-23.2066	-4.53646	1.31759e-08	1.24381e-07
hsa-miR-5787	4.0125	0.484544	0	0.501734	0	0.278387	0	0.414109	0	0.203271	0	8.93308	3	6.51293	3	33.9212	9	4.86696	1	2.25144	0	0.376409	11.2971	-21.0342	-4.39467	3.45607e-07	2.28682e-06
hsa-miR-127-3p	21.8067	2.42272	2	20.5711	20	1.39193	2	1.24233	1	3.45561	8	90.607	35	45.5905	24	55.3452	15	56.7812	17	47.2803	10	5.81674	59.1208	-18.9317	-4.24273	6.73986e-08	5.3616e-07
hsa-miR-455-5p	5.44379	0.484544	0	0.501734	0	0.835161	1	0.414109	0	0.203271	0	6.38077	2	8.37377	4	19.6386	5	14.6009	4	2.25144	0	0.487764	10.2491	-18.7257	-4.22695	8.048e-06	4.04112e-05
hsa-miR-34c-5p	18.2227	1.45363	1	2.50867	2	0.278387	0	2.89876	3	1.4229	3	47.2177	18	30.7038	16	23.2093	6	24.3348	7	6.75433	1	1.71247	26.444	-18.1998	-4.18585	5.79949e-07	3.69914e-06
hsa-miR-92b-5p	3.84238	0.484544	0	0.501734	0	0.278387	0	0.414109	0	0.203271	0	16.59	6	4.65209	2	1.78533	0	11.3562	3	6.75433	1	0.376409	8.2276	-18.1835	-4.18456	1.70782e-07	1.19716e-06
hsa-miR-432-5p	7.0709	0.484544	0	4.51561	4	1.39193	2	0.414109	0	0.203271	0	24.2469	9	28.843	15	37.4919	10	4.86696	1	2.25144	0	1.40189	19.54	-17.9184	-4.16337	1.41963e-05	6.55116e-05
hsa-miR-4448	17.4002	6.29907	6	3.51214	3	2.50548	4	2.07054	2	1.01636	2	52.3224	20	40.008	21	51.7745	14	27.5795	8	47.2803	10	3.08072	43.7929	-17.2537	-4.10884	1.34447e-09	1.58648e-08
hsa-miR-379-5p	13.4815	0.484544	0	24.585	24	1.39193	2	1.24233	1	1.4229	3	37.0085	14	32.5647	17	30.3506	8	14.6009	4	56.2861	12	5.82534	34.1621	-16.3742	-4.03335	3.60458e-06	1.97833e-05
hsa-miR-382-5p	6.35444	1.45363	1	10.5364	10	0.835161	1	0.414109	0	0.203271	0	26.7993	10	17.678	9	8.92664	2	11.3562	3	15.7601	3	2.68852	16.104	-16.2559	-4.02289	4.72897e-06	2.51737e-05
hsa-miR-4741	3.55847	0.484544	0	0.501734	0	1.39193	2	0.414109	0	0.203271	0	11.4854	4	8.37377	4	5.35599	1	8.11161	2	6.75433	1	0.599118	8.01622	-16.1383	-4.01241	9.19743e-08	7.07802e-07
hsa-miR-1254	13.2434	3.39181	3	0.501734	0	0.835161	1	2.89876	3	1.82944	4	21.6946	8	34.4255	18	26.7799	7	14.6009	4	15.7601	3	1.89138	22.6522	-14.7485	-3.8825	2.17396e-07	1.50898e-06
hsa-miR-6821-5p	3.00062	0.484544	0	0.501734	0	0.278387	0	0.414109	0	0.203271	0	1.27615	0	17.678	9	12.4973	3	1.62232	0	6.75433	1	0.376409	7.96561	-14.3229	-3.84025	3.43043e-05	0.00014631
hsa-miR-1304-3p	66.5901	2.42272	2	2.50867	2	10.3003	18	9.5245	11	9.96029	24	49.77	19	116.302	62	123.188	34	89.2277	27	74.2976	16	6.9433	90.5571	-14.2617	-3.83408	6.57425e-09	6.84495e-08
hsa-let-7e-5p	41.3743	2.42272	2	5.51908	5	5.28935	9	4.55519	5	4.2687	10	21.6946	8	28.843	15	123.188	34	79.4937	24	200.378	44	4.41101	90.7195	-14.1169	-3.81935	0.00016688	0.000579173
hsa-miR-433-3p	3.39778	0.484544	0	3.51214	3	0.278387	0	0.414109	0	0.203271	0	16.59	6	10.2346	5	8.92664	2	1.62232	0	6.75433	1	0.97849	8.82558	-14.0484	-3.81234	1.84092e-05	8.30171e-05
hsa-miR-4425	39.7977	3.39181	3	1.5052	1	4.73258	8	2.07054	2	5.48833	13	34.4562	13	53.0339	28	51.7745	14	24.3348	7	74.2976	16	3.43769	47.5794	-13.7527	-3.78165	3.69362e-08	3.18912e-07
hsa-miR-34a-5p	62.2117	10.1754	10	1.5052	1	1.94871	3	5.38341	6	3.86216	9	19.1423	7	88.3898	47	73.1985	20	95.7169	29	20.263	4	4.57498	59.3421	-13.7027	-3.77639	2.146e-06	1.2253e-05
hsa-miR-345-3p	2.03832	0.484544	0	0.501734	0	0.278387	0	0.414109	0	0.203271	0	8.93308	3	4.65209	2	1.78533	0	4.86696	1	6.75433	1	0.376409	5.39836	-13.523	-3.75735	1.43883e-07	1.05339e-06
hsa-miR-299-3p	1.98483	0.484544	0	0.501734	0	0.278387	0	0.414109	0	0.203271	0	8.93308	3	8.37377	4	5.35599	1	1.62232	0	2.25144	0	0.376409	5.30732	-12.5642	-3.65124	7.61944e-07	4.73207e-06
hsa-miR-18a-3p	141.392	10.1754	10	17.5607	17	19.7655	35	16.9785	20	23.3762	57	131.444	51	259.587	139	276.726	77	235.237	72	209.384	46	17.5712	222.475	-12.2837	-3.61867	7.42427e-12	1.85698e-10
hsa-miR-301b-3p	24.0592	1.45363	1	0.501734	0	1.39193	2	2.89876	3	3.45561	8	6.38077	2	36.2863	19	19.6386	5	24.3348	7	29.2688	6	1.94033	23.1819	-12.2022	-3.60906	6.81238e-06	3.4699e-05
hsa-miR-210-5p	21.151	2.42272	2	2.50867	2	1.94871	3	0.414109	0	1.01636	2	11.4854	4	17.678	9	12.4973	3	24.3348	7	20.263	4	1.66211	17.2517	-12.1085	-3.59795	7.80168e-07	4.80312e-06
hsa-miR-21-3p	569.676	61.537	63	90.8139	90	77.1132	138	53.42	64	51.8342	127	588.307	230	925.767	497	1058.7	296	676.508	208	569.615	126	66.9437	763.779	-11.5088	-3.52466	4.50505e-13	1.51884e-11
hsa-miR-146a-5p	19281.7	4285.79	4422	2388.76	2380	4802.45	8625	3162.55	3818	3470.04	8535	65406.8	25626	36759.9	19754	36954.5	10349	32496.7	10015	37939.1	8425	3621.92	41911.4	-11.4908	-3.5224	7.51559e-15	4.83731e-13
hsa-miR-205-5p	2.63957	0.484544	0	0.501734	0	0.278387	0	0.414109	0	0.203271	0	21.6946	8	0.930419	0	5.35599	1	1.62232	0	6.75433	1	0.376409	7.27154	-11.2777	-3.4954	3.58291e-05	0.000150075
hsa-miR-3143	6.11629	1.45363	1	0.501734	0	1.39193	2	0.414109	0	0.609814	1	3.82846	1	10.2346	5	5.35599	1	11.3562	3	11.2572	2	0.874244	8.4065	-10.0193	-3.32471	1.5131e-06	8.9273e-06
hsa-miR-412-5p	1.76449	0.484544	0	0.501734	0	0.278387	0	0.414109	0	0.203271	0	1.27615	0	4.65209	2	8.92664	2	1.62232	0	6.75433	1	0.376409	4.64631	-9.94692	-3.31425	5.97598e-06	3.08831e-05
hsa-miR-224-5p	2.82456	1.45363	1	0.501734	0	0.278387	0	0.414109	0	0.203271	0	3.82846	1	0.930419	0	1.78533	0	11.3562	3	20.263	4	0.570226	7.63269	-9.29048	-3.21575	0.000179339	0.000616368
hsa-miR-301b-5p	3.3811	0.484544	0	0.501734	0	0.278387	0	0.414109	0	0.203271	0	1.27615	0	8.37377	4	8.92664	2	1.62232	0	2.25144	0	0.376409	4.49007	-9.25526	-3.21027	2.47877e-05	0.000109686
hsa-miR-18a-5p	270.953	30.5262	31	25.5885	25	56.5125	101	35.1992	42	39.2314	96	172.281	67	441.949	237	398.128	111	478.585	147	312.951	69	37.4116	360.779	-9.20278	-3.20207	1.4721e-10	2.25469e-09
hsa-miR-4479	1.99972	0.484544	0	0.501734	0	0.278387	0	0.414109	0	0.203271	0	6.38077	2	2.79126	1	5.35599	1	1.62232	0	2.25144	0	0.376409	3.68036	-9.1656	-3.19623	1.15305e-05	5.47893e-05
hsa-miR-411-5p	8.79376	3.39181	3	19.5676	19	1.39193	2	0.414109	0	1.82944	4	16.59	6	26.9821	14	26.7799	7	17.8455	5	15.7601	3	5.31899	20.7915	-9.09894	-3.1857	2.96625e-05	0.000128841
hsa-miR-411-3p	3.76273	2.42272	2	5.51908	5	0.278387	0	0.414109	0	0.609814	1	6.38077	2	10.2346	5	5.35599	1	8.11161	2	15.7601	3	1.84882	9.16861	-9.06266	-3.17993	3.57618e-05	0.000150075
hsa-miR-3940-5p	2.49622	1.45363	1	0.501734	0	0.278387	0	1.24233	1	0.203271	0	6.38077	2	2.79126	1	12.4973	3	4.86696	1	2.25144	0	0.73587	5.75755	-8.90109	-3.15398	5.02746e-05	0.000199969
hsa-miR-182-5p	24.1688	3.39181	3	11.5399	11	2.50548	4	10.3527	12	2.23598	5	24.2469	9	49.3122	26	41.0626	11	56.7812	17	24.7659	5	6.00518	39.2338	-8.52715	-3.09206	4.40383e-06	2.36206e-05
hsa-miR-409-3p	12.1439	4.36089	4	35.6231	35	1.39193	2	0.414109	0	3.86216	9	39.5608	15	30.7038	16	26.7799	7	17.8455	5	20.263	4	9.13045	27.0306	-8.48411	-3.08476	0.000138705	0.000498494
hsa-miR-3651	15.8803	13.0827	13	7.52601	7	3.06226	5	4.55519	5	1.01636	2	24.2469	9	30.7038	16	16.068	4	56.7812	17	47.2803	10	5.8485	35.016	-8.18448	-3.03289	3.68763e-05	0.000152681
hsa-miR-1270	5.34225	0.484544	0	0.501734	0	1.39193	2	0.414109	0	2.23598	5	6.38077	2	6.51293	3	1.78533	0	8.11161	2	24.7659	5	1.00566	9.5113	-8.10958	-3.01963	6.46902e-05	0.000248917
hsa-miR-135a-3p	1.45363	0.484544	0	0.501734	0	0.278387	0	0.414109	0	0.203271	0	8.93308	3	2.79126	1	1.78533	0	1.62232	0	2.25144	0	0.376409	3.47669	-7.94718	-2.99044	6.20979e-05	0.000241568
hsa-miR-1304-5p	8.54058	2.42272	2	0.501734	0	0.835161	1	2.07054	2	1.82944	4	3.82846	1	13.9563	7	33.9212	9	8.11161	2	6.75433	1	1.53192	13.3144	-7.60471	-2.92689	6.82969e-05	0.000261374
hsa-miR-124-5p	34.3188	0.484544	0	0.501734	0	0.278387	0	0.414109	0	0.609814	1	8.93308	3	0.930419	0	1.78533	0	1.62232	0	20.263	4	0.457717	6.70683	-7.47261	-2.90161	0.00367368	0.00861247
hsa-miR-4423-5p	1.64312	0.484544	0	0.501734	0	0.278387	0	0.414109	0	0.203271	0	3.82846	1	4.65209	2	1.78533	0	1.62232	0	2.25144	0	0.376409	2.82793	-7.46476	-2.90009	4.51977e-05	0.000183908
hsa-miR-3200-3p	2.10048	0.484544	0	0.501734	0	0.278387	0	0.414109	0	0.203271	0	3.82846	1	4.65209	2	1.78533	0	1.62232	0	2.25144	0	0.376409	2.82793	-7.46146	-2.89946	6.34893e-05	0.000245631
hsa-miR-625-3p	728.359	186.549	192	105.866	105	182.9	328	209.125	252	112.002	275	1308.06	512	1020.67	548	1301.5	364	981.504	302	1078.44	239	159.289	1138.04	-7.41184	-2.88983	5.35699e-12	1.45875e-10
hsa-miR-34a-3p	1.64315	0.484544	0	0.501734	0	0.278387	0	0.414109	0	0.203271	0	1.27615	0	2.79126	1	1.78533	0	1.62232	0	11.2572	2	0.376409	3.74645	-7.22669	-2.85334	0.000249937	0.000838652
hsa-miR-1226-5p	1.90886	0.484544	0	0.501734	0	0.278387	0	0.414109	0	0.609814	1	3.82846	1	0.930419	0	8.92664	2	4.86696	1	2.25144	0	0.457717	4.16079	-7.05507	-2.81866	9.63553e-05	0.00036287
hsa-miR-30a-5p	4.2124	0.484544	0	0.501734	0	4.1758	7	0.414109	0	0.609814	1	14.0377	5	0.930419	0	19.6386	5	1.62232	0	15.7601	3	1.2372	10.3978	-6.98653	-2.80458	0.00312594	0.0074769
hsa-miR-320c	55.3804	29.5572	30	18.5642	18	14.7545	26	12.8374	15	18.4977	45	90.607	35	125.607	67	112.476	31	144.387	44	164.355	36	18.8422	127.486	-6.91778	-2.79031	1.16908e-09	1.4029e-08
hsa-miR-3605-5p	1.99379	0.484544	0	0.501734	0	0.278387	0	0.414109	0	1.4229	3	3.82846	1	2.79126	1	5.35599	1	4.86696	1	2.25144	0	0.620335	3.81882	-6.77655	-2.76055	0.000659265	0.00196945
hsa-miR-410-3p	1.9482	0.484544	0	4.51561	4	0.278387	0	0.414109	0	0.203271	0	1.27615	0	4.65209	2	8.92664	2	4.86696	1	2.25144	0	1.17918	4.39466	-6.71274	-2.7469	0.000510291	0.00157081
hsa-miR-597-3p	1.45947	0.484544	0	0.501734	0	0.278387	0	0.414109	0	0.203271	0	3.82846	1	2.79126	1	1.78533	0	1.62232	0	2.25144	0	0.376409	2.45576	-6.67834	-2.73949	2.03585e-05	9.12269e-05
hsa-miR-486-5p	40.7186	5.32998	5	51.6786	51	14.1977	25	16.9785	20	12.3996	30	121.235	47	116.302	62	91.0517	25	73.0044	22	96.812	21	20.1169	99.6811	-6.66302	-2.73618	1.56693e-06	9.09335e-06
hsa-miR-1908-3p	1.43427	0.484544	0	0.501734	0	0.835161	1	0.414109	0	0.203271	0	3.82846	1	2.79126	1	1.78533	0	1.62232	0	6.75433	1	0.487764	3.35634	-6.60353	-2.72324	5.01135e-05	0.000199969
hsa-miR-381-3p	17.9148	4.36089	4	57.6994	57	4.1758	7	0.414109	0	8.33412	20	59.9793	23	23.2605	12	19.6386	5	34.0687	10	51.7832	11	14.9969	37.7461	-6.59008	-2.7203	0.00125181	0.0033319
hsa-miR-6871-5p	1.21666	0.484544	0	0.501734	0	0.278387	0	0.414109	0	0.203271	0	1.27615	0	2.79126	1	5.35599	1	1.62232	0	2.25144	0	0.376409	2.65943	-6.57421	-2.71682	0.00013372	0.000485508
hsa-miR-4437	1.72485	1.45363	1	0.501734	0	0.278387	0	0.414109	0	0.203271	0	1.27615	0	2.79126	1	5.35599	1	1.62232	0	6.75433	1	0.570226	3.56001	-6.55763	-2.71317	0.000114642	0.000420552
hsa-miR-4632-5p	1.33469	0.484544	0	0.501734	0	0.278387	0	0.414109	0	0.203271	0	3.82846	1	0.930419	0	5.35599	1	1.62232	0	2.25144	0	0.376409	2.79773	-6.48264	-2.69658	0.000449802	0.00142169
hsa-miR-942-5p	60.3218	19.8663	20	25.5885	25	10.8571	19	18.6349	22	18.0911	44	105.921	41	106.998	57	98.1931	27	111.94	34	146.344	32	18.6076	113.879	-6.36207	-2.6695	7.52499e-09	7.50649e-08
hsa-miR-543	6.91278	4.36089	4	19.5676	19	0.278387	0	1.24233	1	2.64253	6	24.2469	9	13.9563	7	8.92664	2	11.3562	3	15.7601	3	5.61835	14.8492	-6.27329	-2.64922	0.000877709	0.00248567
hsa-miR-378a-3p	3555.74	1067.45	1101	718.985	716	645.022	1158	1071.3	1293	1240.56	3051	3064.05	1200	6986.51	3754	7232.37	2025	7516.21	2316	5495.77	1220	948.664	6058.98	-6.23869	-2.64124	1.53701e-09	1.78394e-08
hsa-miR-493-5p	5.49632	0.484544	0	18.5642	18	1.39193	2	0.414109	0	1.4229	3	21.6946	8	21.3996	11	5.35599	1	8.11161	2	2.25144	0	4.45553	11.7627	-6.1692	-2.62508	0.00211008	0.00524189
hsa-miR-1296-5p	5.83308	2.42272	2	0.501734	0	1.39193	2	2.89876	3	0.609814	1	6.38077	2	8.37377	4	5.35599	1	11.3562	3	6.75433	1	1.56499	7.64422	-6.10717	-2.6105	0.000101047	0.000378525
hsa-miR-3150a-5p	2.97717	2.42272	2	0.501734	0	0.278387	0	1.24233	1	0.609814	1	6.38077	2	4.65209	2	16.068	4	1.62232	0	2.25144	0	1.011	6.19492	-6.07749	-2.60347	0.00180045	0.00460186
hsa-miR-450b-5p	47.6079	4.36089	4	55.6925	55	7.51645	13	2.07054	2	3.45561	8	29.3516	11	28.843	15	62.4865	17	34.0687	10	51.7832	11	14.6192	41.3066	-6.04949	-2.59681	0.000114279	0.000420552
hsa-miR-1273d	2.0884	0.484544	0	1.5052	1	0.835161	1	1.24233	1	0.203271	0	3.82846	1	4.65209	2	5.35599	1	1.62232	0	6.75433	1	0.854101	4.44264	-6.04502	-2.59575	0.000622729	0.00187614
hsa-miR-17-5p	2856.38	460.801	475	408.913	407	754.707	1355	525.504	634	657.583	1617	1716.43	672	5001	2687	4425.83	1239	3752.43	1156	2708.49	601	561.502	3520.83	-5.9596	-2.57522	5.58528e-10	7.06139e-09
hsa-miR-4745-5p	1.33635	0.484544	0	0.501734	0	0.278387	0	0.414109	0	0.203271	0	1.27615	0	4.65209	2	1.78533	0	1.62232	0	2.25144	0	0.376409	2.31747	-5.95071	-2.57306	0.00120651	0.00323564
hsa-miR-4707-5p	2.37089	0.484544	0	0.501734	0	1.39193	2	1.24233	1	0.203271	0	1.27615	0	4.65209	2	8.92664	2	4.86696	1	2.25144	0	0.764762	4.39466	-5.94629	-2.57199	0.00301036	0.00722486
hsa-miR-450a-2-3p	2.45748	0.484544	0	0.501734	0	0.835161	1	0.414109	0	1.01636	2	3.82846	1	8.37377	4	1.78533	0	1.62232	0	6.75433	1	0.650381	4.47284	-5.90553	-2.56207	0.00014107	0.000502238
hsa-miR-320a	2571.3	1041.28	1074	1276.91	1272	1021.4	1834	728.417	879	745.396	1833	7099.25	2781	5099.62	2740	4875.73	1365	5423.42	1671	5189.57	1152	962.682	5537.52	-5.89233	-2.55884	1.83271e-12	5.898e-11
hsa-miR-7974	9.9107	0.484544	0	0.501734	0	0.278387	0	2.07054	2	0.203271	0	1.27615	0	0.930419	0	1.78533	0	14.6009	4	6.75433	1	0.707696	5.06942	-5.86172	-2.55132	0.00681015	0.0146109
hsa-miR-193b-3p	1.72898	0.484544	0	0.501734	0	1.39193	2	0.414109	0	0.203271	0	1.27615	0	2.79126	1	1.78533	0	11.3562	3	2.25144	0	0.599118	3.89209	-5.67485	-2.50458	0.00107895	0.00294941
hsa-miR-760	2.03913	1.45363	1	0.501734	0	0.835161	1	0.414109	0	0.609814	1	8.93308	3	4.65209	2	1.78533	0	1.62232	0	6.75433	1	0.76289	4.74943	-5.63754	-2.49507	0.000600212	0.00182564
hsa-miR-183-5p	17.286	4.36089	4	3.51214	3	3.61903	6	6.21163	7	3.45561	8	3.82846	1	47.4514	25	33.9212	9	47.0473	14	20.263	4	4.23186	30.5023	-5.56983	-2.47763	0.000616902	0.00186652
hsa-miR-96-5p	4.90131	0.484544	0	2.50867	2	0.835161	1	0.414109	0	1.82944	4	1.27615	0	6.51293	3	19.6386	5	11.3562	3	2.25144	0	1.21439	8.20708	-5.4593	-2.44872	0.00474522	0.0106655
hsa-miR-449c-5p	1.81468	0.484544	0	0.501734	0	0.278387	0	0.414109	0	1.4229	3	3.82846	1	2.79126	1	5.35599	1	1.62232	0	2.25144	0	0.620335	3.16989	-5.45466	-2.44749	0.00036609	0.00119443
hsa-miR-149-5p	9.93775	2.42272	2	0.501734	0	4.73258	8	2.89876	3	5.08178	12	14.0377	5	12.0954	6	19.6386	5	8.11161	2	20.263	4	3.12751	14.8293	-5.39846	-2.43255	0.000105359	0.000392599
hsa-miR-6753-3p	1.53419	0.484544	0	0.501734	0	0.278387	0	0.414109	0	0.203271	0	1.27615	0	2.79126	1	1.78533	0	1.62232	0	2.25144	0	0.376409	1.9453	-5.33361	-2.41511	3.1382e-05	0.000135478
hsa-miR-6505-5p	1.26212	0.484544	0	0.501734	0	0.278387	0	0.414109	0	0.203271	0	1.27615	0	2.79126	1	1.78533	0	1.62232	0	2.25144	0	0.376409	1.9453	-5.33349	-2.41508	0.000151453	0.000530836
hsa-miR-6767-5p	1.06977	0.484544	0	0.501734	0	0.278387	0	0.414109	0	0.203271	0	1.27615	0	2.79126	1	1.78533	0	1.62232	0	2.25144	0	0.376409	1.9453	-5.33218	-2.41472	0.00084691	0.00242758
hsa-miR-20a-5p	8053.22	1603.35	1654	1231.76	1227	2430.04	4364	1680.87	2029	2334.57	5742	6040.04	2366	14560.1	7824	12252.7	3431	11208.6	3454	6950.2	1543	1856.12	10202.3	-5.32363	-2.41241	4.76965e-10	6.37154e-09
hsa-miR-197-5p	2.96464	3.39181	3	0.501734	0	1.39193	2	0.414109	0	0.609814	1	3.82846	1	4.65209	2	1.78533	0	11.3562	3	6.75433	1	1.26188	5.67529	-5.30625	-2.40769	0.0004264	0.00135377
hsa-miR-1303	1.60335	1.45363	1	0.501734	0	0.278387	0	1.24233	1	0.203271	0	1.27615	0	6.51293	3	5.35599	1	1.62232	0	2.25144	0	0.73587	3.40377	-5.29336	-2.40418	0.00134162	0.00351803
hsa-miR-19b-1-5p	1.44227	0.484544	0	0.501734	0	0.278387	0	0.414109	0	0.203271	0	3.82846	1	0.930419	0	1.78533	0	1.62232	0	2.25144	0	0.376409	2.0836	-5.25628	-2.39404	0.000277208	0.000925769
hsa-miR-7850-5p	1.55689	0.484544	0	1.5052	1	0.278387	0	0.414109	0	0.609814	1	1.27615	0	2.79126	1	5.35599	1	4.86696	1	2.25144	0	0.658411	3.30836	-5.25097	-2.39258	0.000763149	0.00223269
hsa-miR-3188	2.11404	0.484544	0	0.501734	0	0.278387	0	2.07054	2	0.203271	0	1.27615	0	0.930419	0	5.35599	1	8.11161	2	2.25144	0	0.707696	3.58512	-5.25045	-2.39244	0.00129738	0.00341467
hsa-miR-6877-5p	1.62887	0.484544	0	0.501734	0	0.835161	1	0.414109	0	1.01636	2	3.82846	1	4.65209	2	5.35599	1	1.62232	0	2.25144	0	0.650381	3.54206	-5.24677	-2.39143	0.000453103	0.00142577
hsa-miR-4435	1.25526	0.484544	0	0.501734	0	0.278387	0	0.414109	0	0.203271	0	1.27615	0	0.930419	0	1.78533	0	1.62232	0	6.75433	1	0.376409	2.47371	-5.24217	-2.39016	0.00112271	0.00305724
hsa-miR-450a-1-3p	1.53466	0.484544	0	0.501734	0	0.278387	0	0.414109	0	0.203271	0	1.27615	0	0.930419	0	5.35599	1	1.62232	0	2.25144	0	0.376409	2.28726	-5.23922	-2.38935	0.00455697	0.0103408
hsa-miR-106a-3p	1.3217	0.484544	0	0.501734	0	0.278387	0	0.414109	0	0.203271	0	1.27615	0	0.930419	0	1.78533	0	4.86696	1	2.25144	0	0.376409	2.22206	-5.23914	-2.38933	0.000773851	0.00224544
hsa-miR-6783-3p	1.14143	0.484544	0	0.501734	0	0.278387	0	0.414109	0	0.203271	0	1.27615	0	0.930419	0	1.78533	0	4.86696	1	2.25144	0	0.376409	2.22206	-5.23316	-2.38768	0.00100937	0.00279153
hsa-miR-3164	1.54264	0.484544	0	0.501734	0	0.278387	0	0.414109	0	0.203271	0	1.27615	0	0.930419	0	1.78533	0	4.86696	1	2.25144	0	0.376409	2.22206	-5.23114	-2.38712	0.000331818	0.00108763
hsa-miR-6735-3p	1.24529	0.484544	0	0.501734	0	0.278387	0	0.414109	0	0.203271	0	1.27615	0	0.930419	0	1.78533	0	1.62232	0	6.75433	1	0.376409	2.47371	-5.22995	-2.3868	0.00175171	0.00450985
hsa-miR-3121-3p	1.61757	0.484544	0	0.501734	0	0.278387	0	1.24233	1	0.203271	0	1.27615	0	0.930419	0	5.35599	1	1.62232	0	6.75433	1	0.542052	3.18784	-5.20639	-2.38028	0.000808577	0.00232712
hsa-miR-99b-3p	5.48705	1.45363	1	4.51561	4	0.278387	0	1.24233	1	1.82944	4	1.27615	0	4.65209	2	12.4973	3	11.3562	3	20.263	4	1.86388	10.009	-5.20027	-2.37859	0.0229747	0.0423595
hsa-miR-30a-3p	2.72457	0.484544	0	0.501734	0	3.61903	6	0.414109	0	1.4229	3	16.59	6	6.51293	3	5.35599	1	1.62232	0	2.25144	0	1.28846	6.46654	-5.19122	-2.37607	0.00237586	0.00580699
hsa-miR-6774-5p	1.40019	0.484544	0	0.501734	0	0.278387	0	0.414109	0	0.609814	1	1.27615	0	0.930419	0	1.78533	0	4.86696	1	6.75433	1	0.457717	3.12264	-5.10472	-2.35183	0.00144161	0.00376274
hsa-miR-129-5p	2.0167	2.42272	2	1.5052	1	0.278387	0	1.24233	1	0.203271	0	3.82846	1	2.79126	1	5.35599	1	4.86696	1	2.25144	0	1.13038	3.81882	-5.09162	-2.34812	0.001808	0.00460455
hsa-miR-424-5p	42.0263	1.45363	1	33.6162	33	4.73258	8	4.55519	5	6.70795	16	21.6946	8	38.1472	20	41.0626	11	21.0902	6	29.2688	6	10.2131	30.2527	-5.00321	-2.32285	0.000217357	0.000738091
hsa-miR-487b-3p	1.47205	0.484544	0	4.51561	4	0.278387	0	0.414109	0	0.203271	0	6.38077	2	2.79126	1	1.78533	0	1.62232	0	2.25144	0	1.17918	2.96622	-4.9334	-2.30258	0.00198296	0.0049609
hsa-miR-320b	69.6933	34.4026	35	40.6405	40	37.5822	67	20.2913	24	26.6285	65	162.072	63	164.684	88	119.617	33	150.876	46	150.847	33	31.909	149.619	-4.87335	-2.28492	5.28695e-09	5.58681e-08
hsa-miR-5001-5p	2.54191	0.484544	0	0.501734	0	1.39193	2	1.24233	1	0.609814	1	8.93308	3	0.930419	0	5.35599	1	8.11161	2	2.25144	0	0.84607	5.11651	-4.85886	-2.28062	0.00243238	0.00591795
hsa-miR-636	2.19626	0.484544	0	1.5052	1	2.50548	4	0.414109	0	0.203271	0	6.38077	2	2.79126	1	1.78533	0	4.86696	1	2.25144	0	1.02252	3.61515	-4.81318	-2.26699	0.00176973	0.00453974
hsa-miR-6747-3p	3.4311	0.484544	0	2.50867	2	0.835161	1	2.07054	2	1.82944	4	8.93308	3	4.65209	2	12.4973	3	8.11161	2	2.25144	0	1.54567	7.2891	-4.76803	-2.25339	0.00119833	0.00322593
hsa-miR-548am-3p	4.22311	0.484544	0	0.501734	0	3.06226	5	1.24233	1	1.4229	3	1.27615	0	10.2346	5	5.35599	1	8.11161	2	6.75433	1	1.34275	6.34654	-4.74973	-2.24785	0.000937512	0.00262355
hsa-miR-204-5p	2.7006	2.42272	2	2.50867	2	0.278387	0	1.24233	1	0.609814	1	6.38077	2	10.2346	5	1.78533	0	1.62232	0	11.2572	2	1.41238	6.25605	-4.74668	-2.24692	0.00191105	0.00484956
hsa-miR-222-5p	14.5225	1.45363	1	10.5364	10	8.07322	14	0.414109	0	6.30141	15	11.4854	4	15.8171	8	19.6386	5	24.3348	7	11.2572	2	5.35576	16.5066	-4.73792	-2.24425	0.00965051	0.0196338
hsa-miR-92a-3p	30896.7	8130.16	8389	7549.6	7523	12134	21793	10696.8	12915	13183.6	32428	33237.5	13022	55450.2	29798	57475.1	16096	55316.3	17048	44887	9968	10338.8	49273.2	-4.70046	-2.2328	3.78126e-12	1.07348e-10
hsa-miR-629-5p	355.342	68.3206	70	201.195	200	113.86	204	156.947	189	142.9	351	488.767	191	735.961	395	644.504	180	598.636	184	524.586	116	136.645	598.491	-4.61977	-2.20782	4.98059e-09	5.34281e-08
hsa-miR-203a-3p	8.62778	0.484544	0	0.501734	0	2.50548	4	2.89876	3	1.01636	2	108.473	42	4.65209	2	1.78533	0	1.62232	0	2.25144	0	1.48138	23.7569	-4.61956	-2.20776	0.0202497	0.0380286
hsa-miR-6515-5p	2.52091	1.45363	1	0.501734	0	0.278387	0	1.24233	1	0.609814	1	3.82846	1	0.930419	0	1.78533	0	8.11161	2	6.75433	1	0.817178	4.28203	-4.61486	-2.20629	0.00214149	0.0053013
hsa-miR-143-3p	317.874	16.959	17	2479.07	2470	197.933	355	26.0888	31	25.8155	63	550.023	215	447.531	240	266.014	74	326.087	100	380.494	84	549.173	394.03	-4.55971	-2.18894	0.0142076	0.0283351
hsa-miR-6511b-5p	1.67127	0.484544	0	0.501734	0	0.835161	1	0.414109	0	0.609814	1	1.27615	0	0.930419	0	8.92664	2	4.86696	1	2.25144	0	0.569072	3.65032	-4.48945	-2.16654	0.0043777	0.0100305
hsa-miR-130b-3p	58.1884	21.8045	22	13.5468	13	28.1171	50	12.8374	15	17.2781	42	70.1885	27	99.5548	53	58.9158	16	79.4937	24	105.818	23	18.7168	82.7941	-4.46865	-2.15984	1.4432e-07	1.05339e-06
hsa-miR-195-3p	22.2918	4.36089	4	7.52601	7	5.28935	9	9.5245	11	7.52104	18	59.9793	23	15.8171	8	37.4919	10	21.0902	6	29.2688	6	6.84436	32.7294	-4.35669	-2.12323	4.54974e-05	0.00018407
hsa-miR-766-5p	26.122	14.0518	14	23.5815	23	10.3003	18	5.38341	6	8.33412	20	59.9793	23	32.5647	17	69.6278	19	40.558	12	38.2745	8	12.3302	48.2009	-4.33985	-2.11764	1.12644e-05	5.42531e-05
hsa-miR-136-3p	3.1572	4.36089	4	8.52948	8	0.278387	0	0.414109	0	1.01636	2	11.4854	4	6.51293	3	1.78533	0	4.86696	1	6.75433	1	2.91985	6.28099	-4.31699	-2.11003	0.00748912	0.0158278
hsa-miR-2276-3p	1.7801	0.484544	0	0.501734	0	0.835161	1	0.414109	0	0.203271	0	1.27615	0	2.79126	1	1.78533	0	1.62232	0	2.25144	0	0.487764	1.9453	-4.30594	-2.10633	0.000387159	0.00124031
hsa-let-7e-3p	1.54896	0.484544	0	0.501734	0	0.835161	1	0.414109	0	0.203271	0	1.27615	0	2.79126	1	1.78533	0	1.62232	0	2.25144	0	0.487764	1.9453	-4.30488	-2.10597	0.00950196	0.0193873
hsa-miR-652-5p	3.09993	0.484544	0	0.501734	0	0.835161	1	0.414109	0	0.203271	0	1.27615	0	2.79126	1	1.78533	0	1.62232	0	2.25144	0	0.487764	1.9453	-4.30371	-2.10558	0.001467	0.00380453
hsa-miR-3199	1.34161	1.45363	1	0.501734	0	0.278387	0	0.414109	0	0.203271	0	1.27615	0	0.930419	0	5.35599	1	1.62232	0	2.25144	0	0.570226	2.28726	-4.26464	-2.09242	0.003955	0.00918078
hsa-miR-3165	1.41522	1.45363	1	0.501734	0	0.278387	0	0.414109	0	0.203271	0	1.27615	0	0.930419	0	1.78533	0	1.62232	0	6.75433	1	0.570226	2.47371	-4.25898	-2.09051	0.00464622	0.0104762
hsa-miR-542-3p	16.4825	0.484544	0	19.5676	19	3.06226	5	0.414109	0	3.04907	7	3.82846	1	8.37377	4	12.4973	3	21.0902	6	6.75433	1	5.31552	10.5088	-4.2467	-2.08634	0.00909788	0.0186165
hsa-miR-3662	1.35268	0.484544	0	0.501734	0	0.278387	0	0.414109	0	0.203271	0	1.27615	0	0.930419	0	1.78533	0	1.62232	0	2.25144	0	0.376409	1.57313	-4.24576	-2.08602	0.000642706	0.00192812
hsa-miR-26a-1-3p	1.6279	0.484544	0	0.501734	0	0.278387	0	0.414109	0	0.203271	0	1.27615	0	0.930419	0	1.78533	0	1.62232	0	2.25144	0	0.376409	1.57313	-4.24491	-2.08573	0.000455833	0.00142801
hsa-miR-4461	1.67301	0.484544	0	0.501734	0	0.278387	0	0.414109	0	0.203271	0	1.27615	0	0.930419	0	1.78533	0	1.62232	0	2.25144	0	0.376409	1.57313	-4.24413	-2.08547	0.00505854	0.011192
hsa-miR-944	1.26856	0.484544	0	0.501734	0	0.278387	0	0.414109	0	0.203271	0	1.27615	0	0.930419	0	1.78533	0	1.62232	0	2.25144	0	0.376409	1.57313	-4.24177	-2.08467	0.00877489	0.0180076
hsa-miR-942-3p	4.99929	1.45363	1	0.501734	0	2.50548	4	2.07054	2	1.01636	2	1.27615	0	4.65209	2	8.92664	2	8.11161	2	15.7601	3	1.50955	7.74532	-4.2412	-2.08447	0.00230089	0.00566199
hsa-miR-188-5p	3.01059	1.45363	1	2.50867	2	0.835161	1	1.24233	1	0.609814	1	8.93308	3	4.65209	2	5.35599	1	1.62232	0	6.75433	1	1.32992	5.46356	-4.18542	-2.06537	0.00197126	0.00494912
hsa-miR-3934-5p	23.4548	8.23724	8	11.5399	11	14.7545	26	7.86806	9	9.55375	23	47.2177	18	53.0339	28	30.3506	8	40.558	12	38.2745	8	10.3907	41.8869	-4.11316	-2.04025	2.22981e-06	1.26297e-05
hsa-miR-3939	1.41315	0.484544	0	0.501734	0	1.94871	3	0.414109	0	0.203271	0	1.27615	0	4.65209	2	1.78533	0	1.62232	0	2.25144	0	0.710473	2.31747	-4.03908	-2.01403	0.00204502	0.00509814
hsa-miR-548an	1.39943	0.484544	0	2.50867	2	0.835161	1	0.414109	0	0.203271	0	3.82846	1	2.79126	1	1.78533	0	1.62232	0	2.25144	0	0.889151	2.45576	-3.98837	-1.9958	0.00479088	0.0106665
hsa-miR-143-5p	1.60895	0.484544	0	3.51214	3	1.94871	3	0.414109	0	0.203271	0	3.82846	1	2.79126	1	1.78533	0	4.86696	1	2.25144	0	1.31255	3.10469	-3.90833	-1.96655	0.00640481	0.013825
hsa-miR-642a-3p	35.3783	17.9281	18	10.5364	10	10.8571	19	16.1502	19	12.3996	30	57.427	22	53.0339	28	44.6332	12	34.0687	10	65.2918	14	13.5743	50.8909	-3.78944	-1.92199	5.94052e-06	3.08831e-05
hsa-miR-642b-5p	35.3783	17.9281	18	10.5364	10	10.8571	19	16.1502	19	12.3996	30	57.427	22	53.0339	28	44.6332	12	34.0687	10	65.2918	14	13.5743	50.8909	-3.78944	-1.92199	5.94052e-06	3.08831e-05
hsa-miR-6735-5p	1.93165	1.45363	1	0.501734	0	0.278387	0	1.24233	1	0.609814	1	3.82846	1	0.930419	0	1.78533	0	8.11161	2	2.25144	0	0.817178	3.38145	-3.77034	-1.91469	0.00705322	0.0150866
hsa-miR-3174	1.53595	1.45363	1	0.501734	0	0.278387	0	0.414109	0	1.01636	2	3.82846	1	0.930419	0	1.78533	0	4.86696	1	2.25144	0	0.732843	2.73252	-3.76519	-1.91272	0.00359079	0.00847426
hsa-miR-8485	4.07474	2.42272	2	1.5052	1	2.50548	4	0.414109	0	1.4229	3	6.38077	2	4.65209	2	1.78533	0	11.3562	3	6.75433	1	1.65408	6.18575	-3.72854	-1.89861	0.00413874	0.00951373
hsa-miR-493-3p	1.66266	0.484544	0	3.51214	3	0.278387	0	0.414109	0	1.4229	3	1.27615	0	2.79126	1	1.78533	0	4.86696	1	6.75433	1	1.22242	3.49481	-3.71441	-1.89313	0.00564184	0.012405
hsa-miR-378c	256.741	139.064	143	84.7931	84	62.637	112	108.911	131	139.241	342	228.432	89	425.201	228	423.123	118	556.456	171	299.442	66	106.929	386.531	-3.60998	-1.85199	9.01956e-07	5.45799e-06
hsa-miR-940	2.50858	0.484544	0	0.501734	0	3.06226	5	1.24233	1	0.609814	1	3.82846	1	4.65209	2	1.78533	0	1.62232	0	6.75433	1	1.18013	3.72851	-3.57827	-1.83926	0.0040806	0.00941062
hsa-miR-4477b	2.45827	1.45363	1	0.501734	0	1.39193	2	1.24233	1	0.203271	0	6.38077	2	2.79126	1	1.78533	0	1.62232	0	2.25144	0	0.958579	2.96622	-3.55691	-1.83063	0.00840421	0.0173982
hsa-let-7d-5p	6207.98	2960.08	3054	3507.62	3495	2912.21	5230	3266.07	3943	3087.49	7594	12816.4	5021	10399.3	5588	9849.66	2758	11325.4	3490	11390	2529	3146.69	11156.2	-3.54735	-1.82674	6.22586e-12	1.63256e-10
hsa-miR-3187-5p	1.30565	2.42272	2	0.501734	0	1.39193	2	0.414109	0	0.203271	0	1.27615	0	2.79126	1	5.35599	1	1.62232	0	2.25144	0	0.986753	2.65943	-3.54673	-1.82649	0.00617765	0.0133755
hsa-miR-5001-3p	3.4027	3.39181	3	1.5052	1	2.50548	4	1.24233	1	0.609814	1	3.82846	1	10.2346	5	8.92664	2	4.86696	1	2.25144	0	1.85093	6.02162	-3.49869	-1.80682	0.00845015	0.0174423
hsa-miR-495-3p	3.33898	1.45363	1	13.5468	13	1.39193	2	1.24233	1	0.203271	0	3.82846	1	4.65209	2	1.78533	0	4.86696	1	15.7601	3	3.5676	6.17859	-3.49285	-1.8044	0.0268787	0.0480559
hsa-miR-4659a-3p	5.45296	0.484544	0	1.5052	1	0.278387	0	2.07054	2	3.45561	8	1.27615	0	12.0954	6	12.4973	3	1.62232	0	2.25144	0	1.55886	5.94853	-3.45323	-1.78795	0.0205822	0.0385509
hsa-miR-548p	1.50289	1.45363	1	0.501734	0	0.835161	1	0.414109	0	0.203271	0	1.27615	0	0.930419	0	5.35599	1	1.62232	0	2.25144	0	0.681581	2.28726	-3.43936	-1.78214	0.0139973	0.0279947
hsa-miR-1292-5p	17.3273	8.23724	8	10.5364	10	9.18677	16	6.21163	7	9.14721	22	29.3516	11	30.7038	16	26.7799	7	53.5366	16	15.7601	3	8.66385	31.2264	-3.43117	-1.7787	0.000305133	0.00100951
hsa-miR-214-5p	1.59325	2.42272	2	0.501734	0	0.835161	1	0.414109	0	1.01636	2	1.27615	0	2.79126	1	5.35599	1	4.86696	1	2.25144	0	1.03802	3.30836	-3.41388	-1.77141	0.00366426	0.00861247
hsa-miR-4632-3p	1.31642	0.484544	0	0.501734	0	0.278387	0	1.24233	1	0.609814	1	1.27615	0	0.930419	0	5.35599	1	1.62232	0	2.25144	0	0.623361	2.28726	-3.38591	-1.75954	0.00594396	0.0129487
hsa-miR-497-5p	8.17917	2.42272	2	1.5052	1	5.28935	9	2.89876	3	1.82944	4	6.38077	2	6.51293	3	12.4973	3	8.11161	2	11.2572	2	2.78909	8.95196	-3.34232	-1.74085	0.00126298	0.00334903
hsa-miR-548ai	1.25548	0.484544	0	0.501734	0	0.835161	1	0.414109	0	0.609814	1	1.27615	0	0.930419	0	1.78533	0	4.86696	1	2.25144	0	0.569072	2.22206	-3.32955	-1.73533	0.00815263	0.0169269
hsa-miR-570-5p	1.25548	0.484544	0	0.501734	0	0.835161	1	0.414109	0	0.609814	1	1.27615	0	0.930419	0	1.78533	0	4.86696	1	2.25144	0	0.569072	2.22206	-3.32955	-1.73533	0.00815263	0.0169269
hsa-let-7c-5p	25.9845	11.1445	11	11.5399	11	5.84612	10	11.1809	13	16.8715	41	108.473	42	49.3122	26	1.78533	0	56.7812	17	92.3091	20	11.3166	61.7322	-3.32803	-1.73467	0.0202074	0.0380286
hsa-miR-92a-1-5p	102.764	29.5572	30	32.6127	32	48.1609	86	49.2789	59	40.451	99	118.682	46	136.772	73	126.758	35	147.631	45	132.835	29	40.0121	132.536	-3.32719	-1.7343	2.64696e-07	1.78481e-06
hsa-miR-4510	1.54745	2.42272	2	0.501734	0	1.94871	3	0.414109	0	0.203271	0	1.27615	0	2.79126	1	1.78533	0	4.86696	1	2.25144	0	1.09811	2.59423	-3.31055	-1.72707	0.0191569	0.0364599
hsa-miR-4726-5p	3.49718	2.42272	2	0.501734	0	1.94871	3	2.89876	3	1.82944	4	3.82846	1	4.65209	2	5.35599	1	8.11161	2	6.75433	1	1.92027	5.7405	-3.25852	-1.70422	0.00196013	0.00493869
hsa-miR-4746-5p	13.8553	5.32998	5	4.51561	4	5.28935	9	2.89876	3	5.08178	12	19.1423	7	12.0954	6	16.068	4	8.11161	2	24.7659	5	4.6231	16.0366	-3.24079	-1.69634	0.000315957	0.00104045
hsa-miR-1908-5p	11.3803	1.45363	1	3.51214	3	6.4029	11	13.6656	16	8.33412	20	42.1131	16	6.51293	3	19.6386	5	17.8455	5	20.263	4	6.67368	21.2746	-3.23445	-1.69352	0.003849	0.00896412
hsa-miR-4742-5p	1.68467	1.45363	1	0.501734	0	0.835161	1	0.414109	0	0.609814	1	8.93308	3	0.930419	0	1.78533	0	1.62232	0	2.25144	0	0.76289	3.10452	-3.22262	-1.68823	0.00607011	0.0131829
hsa-miR-5189-3p	1.23081	1.45363	1	0.501734	0	0.278387	0	2.07054	2	0.203271	0	3.82846	1	0.930419	0	1.78533	0	1.62232	0	2.25144	0	0.901513	2.0836	-3.1924	-1.67464	0.0247664	0.0450762
hsa-miR-450a-5p	114.83	8.23724	8	199.189	198	21.4358	38	24.4324	29	26.222	64	133.996	52	92.1114	49	98.1931	27	85.983	26	56.2861	12	55.9032	93.314	-3.18447	-1.67105	0.00332864	0.00788935
hsa-miR-1180-3p	64.4279	32.4644	33	16.5572	16	28.6738	51	48.4507	58	40.8575	100	42.1131	16	192.597	103	173.177	48	95.7169	29	74.2976	16	33.4007	115.58	-3.17941	-1.66876	0.000674515	0.00199815
hsa-miR-3680-5p	1.04642	2.42272	2	0.501734	0	0.278387	0	0.414109	0	0.203271	0	1.27615	0	0.930419	0	1.78533	0	1.62232	0	2.25144	0	0.764044	1.57313	-3.1418	-1.65159	0.0197554	0.0373979
hsa-miR-3688-3p	1.77824	0.484544	0	0.501734	0	0.835161	1	2.07054	2	0.203271	0	3.82846	1	0.930419	0	1.78533	0	1.62232	0	2.25144	0	0.819051	2.0836	-3.12434	-1.64355	0.0152834	0.0301412
hsa-miR-378a-5p	52.0255	21.8045	22	15.5538	15	9.74354	17	29.4017	35	30.694	75	24.2469	9	73.5031	39	66.0572	18	98.9616	30	83.3034	18	21.4395	69.2144	-3.10372	-1.634	0.000491188	0.00151861
hsa-miR-4638-3p	1.9649	0.484544	0	2.50867	2	0.835161	1	1.24233	1	0.609814	1	1.27615	0	6.51293	3	5.35599	1	1.62232	0	2.25144	0	1.1361	3.40377	-3.00972	-1.58963	0.0163321	0.0319423
hsa-miR-98-5p	3073.93	1404.69	1449	1239.79	1235	1508.58	2709	1437.37	1735	1726.79	4247	2767.98	1084	5337.81	2868	5168.53	1447	5390.97	1661	3870.23	859	1463.44	4507.1	-2.9853	-1.57788	1.51307e-07	1.09312e-06
hsa-miR-93-5p	4404.2	1492.88	1540	944.766	941	1725.16	3098	1333.02	1609	1769.48	4352	3148.27	1233	5509.01	2960	4386.55	1228	4596.04	1416	3888.24	863	1453.06	4305.62	-2.95807	-1.56466	1.86354e-08	1.73603e-07
hsa-miR-130a-3p	9.94772	1.45363	1	6.52255	6	5.84612	10	6.21163	7	8.74067	21	14.0377	5	10.2346	5	12.4973	3	30.8241	9	15.7601	3	5.75492	16.6708	-2.92544	-1.54865	0.00255128	0.00618122
hsa-miR-3677-3p	1.78315	0.484544	0	0.501734	0	0.835161	1	2.89876	3	0.203271	0	3.82846	1	0.930419	0	1.78533	0	1.62232	0	2.25144	0	0.984694	2.0836	-2.92366	-1.54778	0.023541	0.0431788
hsa-miR-3177-3p	8.00668	8.23724	8	1.5052	1	3.06226	5	2.07054	2	7.92758	19	11.4854	4	12.0954	6	8.92664	2	17.8455	5	6.75433	1	4.56056	11.4215	-2.91823	-1.54509	0.00449768	0.0102721
hsa-miR-629-3p	8.58286	1.45363	1	3.51214	3	4.73258	8	4.55519	5	3.04907	7	6.38077	2	8.37377	4	8.92664	2	14.6009	4	11.2572	2	3.46052	9.90786	-2.91203	-1.54202	0.00102092	0.00281251
hsa-miR-375	1.35383	1.45363	1	0.501734	0	1.94871	3	0.414109	0	0.203271	0	1.27615	0	0.930419	0	5.35599	1	1.62232	0	2.25144	0	0.904291	2.28726	-2.89532	-1.53372	0.0256132	0.0461429
hsa-miR-93-3p	22.4205	5.32998	5	6.52255	6	10.3003	18	9.5245	11	3.45561	8	6.38077	2	26.9821	14	30.3506	8	34.0687	10	11.2572	2	7.02659	21.8079	-2.87722	-1.52468	0.00255805	0.00618122
hsa-miR-369-3p	1.54477	1.45363	1	4.51561	4	0.278387	0	0.414109	0	1.01636	2	3.82846	1	4.65209	2	1.78533	0	1.62232	0	2.25144	0	1.53562	2.82793	-2.86874	-1.52042	0.0197359	0.0373979
hsa-miR-3922-5p	1.86695	0.484544	0	0.501734	0	0.278387	0	1.24233	1	1.4229	3	1.27615	0	2.79126	1	1.78533	0	1.62232	0	2.25144	0	0.785978	1.9453	-2.84824	-1.51007	0.0120157	0.0240994
hsa-miR-148a-5p	42.7855	9.20633	9	26.5919	26	8.07322	14	10.3527	12	17.2781	42	37.0085	14	34.4255	18	41.0626	11	47.0473	14	24.7659	5	14.3004	36.8619	-2.82734	-1.49945	0.00069329	0.0020452
hsa-miR-2467-5p	1.76198	2.42272	2	0.501734	0	0.278387	0	1.24233	1	1.01636	2	1.27615	0	2.79126	1	1.78533	0	4.86696	1	2.25144	0	1.0923	2.59423	-2.80904	-1.49008	0.0147068	0.0290849
hsa-miR-3140-3p	4.01211	1.45363	1	2.50867	2	0.835161	1	3.72698	4	3.04907	7	8.93308	3	10.2346	5	5.35599	1	1.62232	0	6.75433	1	2.3147	6.58006	-2.79986	-1.48535	0.0108119	0.0218709
hsa-miR-4775	1.25109	0.484544	0	0.501734	0	1.94871	3	0.414109	0	0.609814	1	1.27615	0	0.930419	0	1.78533	0	4.86696	1	2.25144	0	0.791782	2.22206	-2.77301	-1.47145	0.0263024	0.0471696
hsa-miR-155-3p	2.85031	1.45363	1	0.501734	0	0.278387	0	1.24233	1	0.609814	1	3.82846	1	0.930419	0	1.78533	0	1.62232	0	2.25144	0	0.817178	2.0836	-2.75948	-1.46439	0.0167874	0.032703
hsa-miR-6502-5p	1.41199	0.484544	0	0.501734	0	0.278387	0	2.07054	2	1.01636	2	1.27615	0	0.930419	0	1.78533	0	4.86696	1	2.25144	0	0.870313	2.22206	-2.73409	-1.45106	0.0279612	0.0498653
hsa-miR-139-5p	30.5657	15.9899	16	43.6509	43	19.2087	34	16.1502	19	24.5958	60	65.0839	25	60.4772	32	37.4919	10	56.7812	17	92.3091	20	23.9191	62.4287	-2.71015	-1.43837	0.000600809	0.00182564
hsa-miR-625-5p	55.2507	17.9281	18	20.5711	20	28.6738	51	29.4017	35	29.4743	72	192.699	75	66.0597	35	33.9212	9	43.8027	13	65.2918	14	25.2098	80.355	-2.68407	-1.42442	0.000767374	0.0022358
hsa-miR-345-5p	68.8026	34.4026	35	58.7029	58	39.2525	70	20.2913	24	16.8715	41	54.8747	21	77.2248	41	101.764	28	105.451	32	69.7947	15	33.9042	81.8217	-2.66444	-1.41383	0.000217883	0.000738091
hsa-let-7d-3p	855.769	356.14	367	594.555	592	411.177	738	550.35	664	559.199	1375	863.957	338	1411.45	758	1483.61	415	1172.94	361	1708.84	379	494.284	1328.16	-2.64533	-1.40345	1.54539e-06	9.04245e-06
hsa-miR-491-3p	1.53386	0.484544	0	0.501734	0	2.50548	4	0.414109	0	0.609814	1	1.27615	0	0.930419	0	1.78533	0	4.86696	1	2.25144	0	0.903136	2.22206	-2.63605	-1.39838	0.0253596	0.0458465
hsa-miR-425-3p	45.9921	16.959	17	13.5468	13	9.18677	16	12.8374	15	18.4977	45	8.93308	3	47.4514	25	62.4865	17	60.0259	18	38.2745	8	14.2055	43.4343	-2.56809	-1.36069	0.0217034	0.0403308
hsa-miR-1244	1.55039	0.484544	0	2.50867	2	0.835161	1	2.07054	2	0.609814	1	6.38077	2	2.79126	1	1.78533	0	1.62232	0	2.25144	0	1.30175	2.96622	-2.55349	-1.35247	0.0253839	0.0458465
hsa-miR-7706	71.3369	30.5262	31	39.637	39	21.4358	38	26.9171	32	45.3295	111	75.2931	29	103.276	55	66.0572	18	92.4723	28	65.2918	14	32.7691	80.4782	-2.53132	-1.33989	5.30688e-05	0.000209903
hsa-miR-4446-3p	18.6211	8.23724	8	17.5607	17	14.7545	26	8.69628	10	8.33412	20	39.5608	15	17.678	9	37.4919	10	30.8241	9	15.7601	3	11.5166	28.263	-2.43046	-1.28123	0.00164447	0.00424922
hsa-miR-25-5p	38.9743	25.6808	26	45.6578	45	21.9926	39	23.6042	28	15.2453	37	126.339	49	32.5647	17	58.9158	16	34.0687	10	78.8005	17	26.4361	66.1378	-2.38207	-1.25222	0.00369703	0.0086386
hsa-miR-148a-3p	7590.54	2015.22	2079	4740.89	4724	2754.64	4947	2395.62	2892	4178.24	10277	6698.54	2624	6353.83	3414	8546.37	2393	8625.88	2658	6441.38	1430	3216.92	7333.2	-2.35655	-1.23668	2.89919e-05	0.000126705
hsa-miR-3928-3p	11.038	10.1754	10	4.51561	4	4.1758	7	7.86806	9	5.89487	14	16.59	6	15.8171	8	12.4973	3	8.11161	2	20.263	4	6.52595	14.6558	-2.30947	-1.20756	0.00452281	0.0102963
hsa-miR-1255b-5p	2.29296	1.45363	1	1.5052	1	1.39193	2	2.07054	2	1.01636	2	3.82846	1	4.65209	2	5.35599	1	1.62232	0	2.25144	0	1.48753	3.54206	-2.28867	-1.19451	0.0186405	0.0356689
hsa-miR-126-3p	371.969	233.065	240	1547.85	1542	120.542	216	191.732	231	223.802	550	728.684	285	784.343	421	412.411	115	507.787	156	790.256	175	463.398	644.696	-2.28787	-1.19401	0.0116472	0.0234268
hsa-miR-671-5p	10.6693	10.1754	10	7.52601	7	12.5274	22	2.89876	3	3.86216	9	16.59	6	25.1213	13	12.4973	3	11.3562	3	6.75433	1	7.39795	14.4638	-2.17581	-1.12155	0.0182383	0.0351846
hsa-miR-9-3p	13.6829	15.0209	15	7.52601	7	7.51645	13	4.55519	5	7.1145	17	11.4854	4	28.843	15	37.4919	10	8.11161	2	11.2572	2	8.3466	19.4378	-2.16533	-1.11458	0.0229318	0.0423595
hsa-miR-130b-5p	119.129	43.1244	44	43.6509	43	40.3661	72	68.3279	82	100.213	246	77.8454	30	116.302	62	126.758	35	89.2277	27	272.425	60	59.1364	136.512	-2.1011	-1.07114	0.00262501	0.00632146
hsa-miR-15b-3p	146.94	66.3825	68	65.7272	65	87.1351	156	77.4383	93	85.9838	211	139.101	54	181.432	97	191.03	53	134.653	41	164.355	36	76.5334	162.114	-2.09185	-1.06478	4.7427e-05	0.000190786
hsa-miR-30c-1-3p	37.7501	17.9281	18	13.5468	13	12.5274	22	15.322	18	23.7827	58	24.2469	9	34.4255	18	33.9212	9	56.7812	17	20.263	4	16.6214	33.9276	-1.94625	-0.960695	0.00593452	0.0129487
hsa-miR-20b-5p	1780.28	852.312	879	453.066	451	1289.77	2316	603.356	728	947.448	2330	1461.2	572	1487.74	799	1733.55	485	1481.18	456	1519.72	337	829.19	1536.68	-1.93417	-0.951712	0.000736739	0.00216436
hsa-miR-191-3p	31.725	11.1445	11	15.5538	15	9.18677	16	18.6349	22	24.5958	60	29.3516	11	26.9821	14	30.3506	8	30.8241	9	29.2688	6	15.8231	29.3554	-1.9236	-0.943805	0.00776521	0.0162488
hsa-miR-106a-5p	1163.77	661.402	682	276.456	275	872.186	1566	512.252	618	733.2	1803	1121.74	439	1082.08	581	1062.27	297	1010.71	311	1100.96	244	611.099	1075.55	-1.85353	-0.890277	0.00230318	0.00566199
hsa-miR-9-5p	260.033	224.344	231	228.289	227	191.809	344	135.413	163	112.002	275	213.118	83	633.615	340	373.134	104	329.331	101	119.326	26	178.371	333.705	-1.77021	-0.823922	0.024011	0.0438403
hsa-miR-221-3p	4864.23	3986.34	4113	2655.68	2646	3728.99	6697	2598.53	3137	3803.41	9355	4753.68	1862	7641.53	4106	5618.43	1573	5822.51	1794	5180.57	1150	3354.59	5803.34	-1.7355	-0.795352	6.97217e-05	0.000265392
hsa-miR-1273h-3p	78.4181	60.568	62	51.6786	51	44.2635	79	41.825	50	62.8108	154	88.0547	34	93.9723	50	62.4865	17	66.5152	20	164.355	36	52.2292	95.0768	-1.70789	-0.772216	0.0168596	0.032703
hsa-miR-421	130.206	81.8879	84	101.852	101	86.0215	154	100.628	121	106.311	261	103.369	40	177.71	95	183.889	51	193.056	59	128.332	28	95.3402	157.271	-1.61192	-0.68878	0.00458817	0.0103784
hsa-miR-1307-3p	515.87	381.336	393	327.633	326	386.679	694	357.376	431	433.984	1067	631.697	247	499.635	268	569.52	159	673.263	207	659.673	146	377.402	606.757	-1.58616	-0.665535	0.000670429	0.00199438
hsa-miR-106b-3p	1478.14	828.085	854	531.337	529	881.094	1582	769.828	929	981.597	2414	1463.75	573	1515.65	814	1008.71	282	1156.71	356	1069.44	237	798.388	1242.85	-1.56444	-0.645642	0.0033318	0.00788935
hsa-miR-16-2-3p	503.401	248.571	256	271.438	270	300.936	540	327.56	395	378.694	931	527.052	206	402.871	216	419.552	117	387.735	119	479.557	106	305.44	443.353	-1.44111	-0.52718	0.00772947	0.0162488
hsa-miR-185-5p	1620.58	1475.44	1522	1125.39	1121	1625.5	2919	1341.3	1619	1299.92	3197	2390.24	936	2209.74	1187	1765.69	494	1877.03	578	1515.22	336	1373.51	1951.58	-1.42231	-0.508237	0.00476721	0.0106665
hsa-miR-21-5p	123935	72945.6	75272	81082.8	80802	78027.1	140141	67655.8	81688	66022.7	162400	114470	44849	114221	61381	94749.2	26535	91474.6	28192	88452.4	19643	73146.8	100673	-1.38446	-0.469323	0.000175381	0.000605705
hsa-let-7i-5p	37536.8	24986.5	25783	27866.8	27770	34563.1	62077	29075.8	35106	32284.6	79412	49643.7	19450	35691.8	19180	31152.2	8724	34982.1	10781	34773.5	7722	29755.4	37248.7	-1.23857	-0.30868	0.025156	0.0456678
hsa-let-7b-5p	2751.86	4222.8	4357	3960.19	3946	4289.11	7703	3337.3	4029	3875.77	9533	4016.06	1573	2513.06	1350	2629.79	736	3499.35	1078	2595.91	576	3937.03	3050.83	1.31	0.389569	0.0208008	0.0388574
hsa-miR-24-3p	6212.34	5668.68	5849	6708.69	6685	7232.77	12990	6118.45	7387	9717.39	23902	4595.43	1800	5045.66	2711	5650.56	1582	5637.57	1737	5423.72	1204	7089.19	5270.59	1.34735	0.43012	0.0155199	0.030438
hsa-miR-15b-5p	596.211	360.016	371	228.289	227	535.338	961	334.186	403	463.255	1139	220.775	86	307.969	165	233.878	65	303.374	93	168.858	37	384.217	246.971	1.53135	0.614806	0.0178319	0.0344945
hsa-miR-328-3p	212.115	228.22	235	237.32	236	148.937	267	233.971	282	368.531	906	105.921	41	172.127	92	148.182	41	98.9616	30	254.413	56	243.396	155.921	1.62234	0.698074	0.0153436	0.0301757
hsa-miR-589-5p	81.3501	104.177	107	81.7827	81	133.347	239	101.457	122	123.386	303	72.7408	28	53.0339	28	73.1985	20	56.7812	17	60.7889	13	108.83	63.3087	1.73791	0.797355	0.00401638	0.0092928
hsa-miR-1301-3p	82.3385	138.095	142	107.873	107	145.04	260	94.0026	113	110.376	271	162.072	63	49.3122	26	55.3452	15	43.8027	13	69.7947	15	119.077	76.0653	1.75104	0.80821	0.010483	0.0212664
hsa-miR-660-5p	43.1519	59.5989	61	49.6717	49	78.7835	141	51.7636	62	71.3482	175	16.59	6	51.173	27	33.9212	9	50.292	15	33.7716	7	62.2332	37.1496	1.78714	0.837657	0.0109136	0.0220137
hsa-miR-548k	81.1722	112.899	116	84.7931	84	70.4319	126	98.1437	118	124.605	306	59.9793	23	51.173	27	62.4865	17	47.0473	14	42.7774	9	98.1745	52.6927	1.83997	0.879682	0.00194346	0.00491419
hsa-miR-19b-3p	1731.22	1620.8	1672	1288.96	1284	2543.06	4567	1782.74	2152	2473.61	6084	539.814	211	1201.17	645	1397.91	391	1296.23	399	1037.91	230	1941.83	1094.61	1.84813	0.886068	0.00080182	0.0023171
hsa-miR-339-5p	334.295	493.75	509	321.612	320	528.1	948	307.683	371	522.204	1284	238.641	93	255.865	137	226.737	63	209.279	64	213.887	47	434.67	228.882	1.86086	0.89597	0.000301638	0.00100263
hsa-miR-1271-5p	72.9805	126.466	130	72.7515	72	82.1241	147	84.064	101	92.0819	226	49.77	19	45.5905	24	33.9212	9	47.0473	14	51.7832	11	91.4975	45.6225	1.98296	0.987655	0.000892207	0.00250668
hsa-miR-330-5p	120.612	161.353	166	135.97	135	192.365	345	133.757	161	150.624	370	93.1593	36	88.3898	47	58.9158	16	73.0044	22	74.2976	16	154.814	77.5534	1.98378	0.988254	0.000380311	0.00122391
hsa-miR-29a-3p	10566.4	16519.5	17046	14201.6	14152	17702.9	31795	11669.2	14089	15709.4	38641	4774.1	1870	10423.5	5601	9746.11	2729	8025.62	2473	5720.92	1270	15160.5	7738.04	2.0223	1.01599	1.00407e-05	4.97119e-05
hsa-miR-3941	1.75893	5.32998	5	2.50867	2	2.50548	4	2.89876	3	3.45561	8	1.27615	0	0.930419	0	1.78533	0	1.62232	0	2.25144	0	3.3397	1.57313	2.12082	1.08462	0.022918	0.0423595
hsa-miR-30c-5p	2748.73	2940.7	3034	2103.77	2096	2680.03	4813	3416.81	4125	4555.51	11205	991.572	388	1904.57	1023	1394.34	390	1744	537	1335.11	296	3139.36	1473.92	2.13399	1.09356	3.58067e-05	0.000150075
hsa-miR-548aq-3p	16.7616	15.9899	16	6.52255	6	19.7655	35	22.776	27	20.5304	50	3.82846	1	8.37377	4	5.35599	1	8.11161	2	20.263	4	17.1169	9.18656	2.13899	1.09693	0.0214237	0.0399157
hsa-miR-335-5p	6.33447	15.9899	16	14.5503	14	17.5384	31	4.55519	5	8.33412	20	3.82846	1	4.65209	2	5.35599	1	4.86696	1	6.75433	1	12.1936	5.09157	2.18177	1.1255	0.0263164	0.0471696
hsa-miR-106b-5p	369.971	351.294	362	208.22	207	459.06	824	286.977	346	338.853	833	144.206	56	173.988	93	137.47	38	131.408	40	146.344	32	328.881	146.683	2.18599	1.12829	0.000117912	0.00043032
hsa-miR-4677-3p	11.1914	9.20633	9	14.5503	14	13.641	24	16.9785	20	15.2453	37	6.38077	2	2.79126	1	5.35599	1	14.6009	4	6.75433	1	13.9243	7.17665	2.2695	1.18237	0.00560918	0.0123716
hsa-miR-671-3p	72.5942	93.5169	96	88.807	88	53.7287	96	102.285	123	152.25	374	31.9039	12	38.1472	20	51.7745	14	37.3134	11	56.2861	12	98.1175	43.085	2.26972	1.18252	0.000986411	0.00273874
hsa-miR-223-5p	44.0129	30.5262	31	234.31	233	58.7396	105	51.7636	62	53.8669	132	29.3516	11	17.678	9	26.7799	7	37.3134	11	33.7716	7	85.8413	28.9789	2.33822	1.22541	0.0185672	0.0356248
hsa-miR-505-5p	16.8739	24.7117	25	44.6544	44	19.7655	35	35.1992	42	28.2547	69	21.6946	8	4.65209	2	19.6386	5	14.6009	4	11.2572	2	30.5171	14.3687	2.3497	1.23248	0.00663176	0.0142714
hsa-miR-1306-5p	11.978	15.9899	16	12.5434	12	14.1977	25	21.1195	25	14.0257	34	3.82846	1	4.65209	2	12.4973	3	8.11161	2	6.75433	1	15.5753	7.16876	2.36646	1.24273	0.00738625	0.0157514
hsa-miR-146b-3p	118.975	242.756	250	190.157	189	212.966	382	180.137	217	217.704	535	80.3978	31	80.9464	43	101.764	28	98.9616	30	78.8005	17	208.744	88.174	2.37965	1.25075	1.10086e-05	5.33841e-05
hsa-miR-548ac	2.55305	7.26815	7	4.51561	4	3.06226	5	1.24233	1	4.67524	11	1.27615	0	0.930419	0	1.78533	0	1.62232	0	2.25144	0	4.15272	1.57313	2.38715	1.25529	0.0233047	0.0428564
hsa-miR-628-3p	3.6502	7.26815	7	8.52948	8	4.73258	8	7.03985	8	5.48833	13	1.27615	0	4.65209	2	1.78533	0	4.86696	1	2.25144	0	6.61168	2.9664	2.42334	1.277	0.0168334	0.032703
hsa-miR-4999-5p	2.59085	7.26815	7	4.51561	4	4.1758	7	1.24233	1	3.86216	9	1.27615	0	0.930419	0	1.78533	0	1.62232	0	2.25144	0	4.21281	1.57313	2.43981	1.28677	0.0240255	0.0438403
hsa-miR-4662a-5p	3.77088	2.42272	2	5.51908	5	4.73258	8	6.21163	7	7.1145	17	1.27615	0	0.930419	0	1.78533	0	8.11161	2	2.25144	0	5.2001	2.87099	2.46054	1.29897	0.0187962	0.0358699
hsa-miR-548h-3p	4.59543	7.26815	7	6.52255	6	6.95967	12	7.03985	8	7.1145	17	1.27615	0	6.51293	3	1.78533	0	4.86696	1	2.25144	0	6.98094	3.33856	2.4821	1.31156	0.00778017	0.0162488
hsa-miR-548z	4.59543	7.26815	7	6.52255	6	6.95967	12	7.03985	8	7.1145	17	1.27615	0	6.51293	3	1.78533	0	4.86696	1	2.25144	0	6.98094	3.33856	2.4821	1.31156	0.00778017	0.0162488
hsa-miR-30e-3p	1325.71	1675.07	1728	1488.65	1483	1805.34	3242	1782.74	2152	2309.37	5680	585.755	229	884.828	475	623.08	174	783.581	241	767.742	170	1812.23	728.997	2.50611	1.32545	1.26821e-07	9.45151e-07
hsa-miR-363-5p	31.4479	41.1862	42	45.6578	45	42.0364	75	45.1378	54	52.2407	128	59.9793	23	8.37377	4	12.4973	3	11.3562	3	29.2688	6	45.2518	24.2951	2.51871	1.33269	0.00237857	0.00580699
hsa-miR-548ar-3p	7.01064	9.20633	9	3.51214	3	4.1758	7	10.3527	12	12.8061	31	3.82846	1	6.51293	3	1.78533	0	1.62232	0	2.25144	0	8.01062	3.2001	2.55473	1.35317	0.0144591	0.028693
hsa-miR-33a-5p	43.8679	39.248	40	26.5919	26	40.9229	73	52.5918	63	46.5491	114	6.38077	2	13.9563	7	30.3506	8	17.8455	5	24.7659	5	41.1807	18.6598	2.55927	1.35573	0.00096943	0.00270219
hsa-miR-659-5p	6.86955	9.20633	9	11.5399	11	6.4029	11	7.86806	9	17.2781	42	6.38077	2	6.51293	3	5.35599	1	1.62232	0	2.25144	0	10.459	4.42469	2.56265	1.35764	0.0144681	0.028693
hsa-miR-664b-5p	2.62098	4.36089	4	6.52255	6	3.61903	6	1.24233	1	6.30141	15	1.27615	0	0.930419	0	1.78533	0	1.62232	0	2.25144	0	4.40924	1.57313	2.58217	1.36858	0.0199763	0.0377153
hsa-miR-28-3p	908.232	1712.86	1767	1461.55	1456	1485.75	2668	1489.55	1798	1793.46	4411	555.127	217	786.204	422	498.107	139	666.774	205	547.101	121	1588.64	610.662	2.61217	1.38525	5.20381e-08	4.33447e-07
hsa-miR-548j-5p	35.2079	49.908	51	44.6544	44	56.5125	101	67.4997	81	54.68	134	21.6946	8	26.9821	14	37.4919	10	21.0902	6	6.75433	1	54.6509	22.8026	2.64797	1.40489	0.000469147	0.00145682
hsa-miR-3913-3p	3.5039	3.39181	3	5.51908	5	4.73258	8	6.21163	7	8.33412	20	6.38077	2	0.930419	0	1.78533	0	1.62232	0	2.25144	0	5.63784	2.59406	2.68383	1.42429	0.00745081	0.0157939
hsa-miR-3913-5p	3.5039	3.39181	3	5.51908	5	4.73258	8	6.21163	7	8.33412	20	6.38077	2	0.930419	0	1.78533	0	1.62232	0	2.25144	0	5.63784	2.59406	2.68383	1.42429	0.00745081	0.0157939
hsa-miR-548f-5p	63.6967	52.8153	54	55.6925	55	75.9996	136	134.585	162	78.666	193	31.9039	12	28.843	15	23.2093	6	24.3348	7	33.7716	7	79.5517	28.4125	2.68452	1.42467	0.00040016	0.00127618
hsa-miR-5193	2.96935	4.36089	4	7.52601	7	5.84612	10	4.55519	5	3.86216	9	1.27615	0	0.930419	0	1.78533	0	1.62232	0	6.75433	1	5.23008	2.47371	2.69659	1.43114	0.00874325	0.0179948
hsa-miR-651-5p	84.6473	113.868	117	101.852	101	179.56	322	86.5487	104	115.255	283	31.9039	12	69.7814	37	62.4865	17	24.3348	7	38.2745	8	119.417	45.3562	2.72569	1.44662	0.000150578	0.000530393
hsa-miR-3615	144.374	164.26	169	361.75	360	352.159	632	145.352	175	236.811	582	118.682	46	77.2248	41	101.764	28	47.0473	14	119.326	26	252.067	92.8089	2.72605	1.44681	0.000376588	0.00121746
hsa-miR-429	24.2561	30.5262	31	23.5815	23	29.2306	52	44.3096	53	35.5725	87	6.38077	2	12.0954	6	8.92664	2	24.3348	7	11.2572	2	32.6441	12.599	2.84819	1.51005	0.00113571	0.00308079
hsa-miR-16-5p	3313.51	4522.25	4666	3549.77	3537	6032.92	10835	3740.64	4516	5414.54	13318	1803.21	706	1664.52	894	1319.36	369	1555.81	479	1695.34	376	4652.02	1607.65	2.87989	1.52602	3.79394e-08	3.23628e-07
hsa-miR-151a-3p	146.286	296.056	305	310.574	309	152.834	274	302.713	365	451.872	1111	98.2639	38	129.328	69	87.4811	24	76.2491	23	105.818	23	302.81	99.428	2.89127	1.5317	0.00019604	0.000670515
hsa-miR-132-5p	90.3158	116.775	120	101.852	101	96.0435	172	107.254	129	258.764	636	47.2177	18	40.008	21	30.3506	8	53.5366	16	56.2861	12	136.138	45.4798	2.91784	1.5449	0.000244908	0.000825689
hsa-miR-2110	44.6389	82.857	85	108.876	108	92.7028	166	81.5794	98	69.3155	170	62.5316	24	25.1213	13	33.9212	9	11.3562	3	33.7716	7	87.0662	33.3404	2.93525	1.55348	8.62886e-05	0.000326697
hsa-miR-374b-3p	28.4543	24.7117	25	19.5676	19	26.4468	47	31.0581	37	29.4743	72	1.27615	0	13.9563	7	26.7799	7	4.86696	1	24.7659	5	26.2517	14.329	3.01502	1.59217	0.00486205	0.010791
hsa-miR-139-3p	3.75326	1.45363	1	16.5572	16	5.28935	9	6.21163	7	9.96029	24	1.27615	0	0.930419	0	8.92664	2	1.62232	0	2.25144	0	7.89443	3.0014	3.03383	1.60114	0.0183061	0.0352193
hsa-let-7b-3p	47.9171	72.197	74	83.7896	83	67.648	121	80.7512	97	118.101	290	14.0377	5	32.5647	17	44.6332	12	24.3348	7	33.7716	7	84.4973	29.8684	3.04072	1.60441	3.75615e-05	0.000154614
hsa-miR-548ay-3p	4.32803	6.29907	6	4.51561	4	3.61903	6	11.1809	13	5.89487	14	1.27615	0	2.79126	1	1.78533	0	1.62232	0	2.25144	0	6.3019	1.9453	3.06157	1.61427	0.00144557	0.00376274
hsa-miR-200c-3p	303.15	605.195	624	495.212	493	589.902	1059	611.638	738	701.489	1725	230.984	90	173.988	93	212.454	59	167.099	51	200.378	44	600.687	196.981	3.07882	1.62238	5.89675e-08	4.79874e-07
hsa-miR-576-5p	128.777	183.642	189	114.897	114	260.292	467	201.671	243	244.535	601	29.3516	11	97.694	52	51.7745	14	79.4937	24	87.8063	19	201.007	69.224	3.09629	1.63054	3.38442e-05	0.000145222
hsa-miR-1249-3p	9.30369	8.23724	8	15.5538	15	23.1061	41	13.6656	16	25.4089	62	6.38077	2	2.79126	1	5.35599	1	4.86696	1	11.2572	2	17.1943	6.13044	3.10539	1.63477	0.00128816	0.00340306
hsa-miR-10a-5p	6227.35	10646.9	10986	6265.16	6243	4932.18	8858	4916.71	5936	26007.1	63971	4335.1	1698	1638.47	880	2501.25	700	1714.79	528	5914.54	1313	10553.6	3220.83	3.11889	1.64103	0.00106976	0.00293562
hsa-miR-27a-5p	858.02	737.96	761	774.176	771	1997.43	3587	788.877	952	2105.69	5179	751.655	294	378.68	203	223.166	62	274.172	84	412.014	91	1280.83	407.938	3.1217	1.64233	0.000148418	0.000525399
hsa-miR-548e-3p	43.375	50.8771	52	49.6717	49	68.7616	123	67.4997	81	77.8529	191	11.4854	4	28.843	15	33.9212	9	21.0902	6	11.2572	2	62.9326	21.3194	3.21543	1.68501	3.80207e-05	0.000155599
hsa-miR-6803-3p	2.60937	5.32998	5	1.5052	1	8.07322	14	4.55519	5	7.1145	17	1.27615	0	0.930419	0	1.78533	0	1.62232	0	2.25144	0	5.31562	1.57313	3.23092	1.69195	0.00325469	0.00775865
hsa-miR-181b-5p	7787.11	17248.3	17798	14535.7	14485	15042.6	27017	11776	14218	16986	41781	4957.86	1942	4027.78	2164	3990.21	1117	5076.24	1564	5419.22	1203	15117.7	4694.26	3.24274	1.69721	8.73039e-11	1.43747e-09
hsa-miR-181a-3p	955.438	830.992	857	591.545	589	706.267	1268	1261.79	1523	1644.26	4044	292.239	114	244.7	131	269.585	75	322.842	99	366.985	81	1006.97	299.27	3.2434	1.69751	1.66415e-06	9.57901e-06
hsa-miR-548w	7.21894	8.23724	8	9.53295	9	8.62999	15	11.1809	13	10.3668	25	6.38077	2	4.65209	2	1.78533	0	1.62232	0	2.25144	0	9.58959	3.33839	3.25926	1.70454	0.000462979	0.00144401
hsa-miR-29a-5p	4.3806	8.23724	8	6.52255	6	9.74354	17	7.03985	8	3.04907	7	1.27615	0	2.79126	1	1.78533	0	1.62232	0	2.25144	0	6.91845	1.9453	3.3041	1.72426	0.00117168	0.00316621
hsa-miR-4728-3p	2.72618	3.39181	3	6.52255	6	8.62999	15	7.86806	9	2.64253	6	1.27615	0	0.930419	0	1.78533	0	1.62232	0	2.25144	0	5.81099	1.57313	3.41238	1.77078	0.00584117	0.0128035
hsa-miR-339-3p	355.293	686.598	708	555.42	553	606.605	1089	474.983	573	880.368	2165	215.67	84	235.396	126	155.324	43	167.099	51	146.344	32	640.795	183.967	3.43459	1.78014	6.9429e-08	5.46175e-07
hsa-let-7g-5p	81422	145652	150298	109681	109301	131682	236508	134687	162622	162768	400370	50184.8	19662	47485.8	25518	31644.9	8862	36364.3	11207	32922.8	7311	136894	39720.5	3.43596	1.78071	8.22407e-12	1.94088e-10
hsa-miR-152-3p	325.748	678.846	700	397.875	396	540.906	971	458.418	553	623.027	1532	179.938	70	211.205	113	108.905	30	131.408	40	141.841	31	539.814	154.659	3.46012	1.79082	9.91768e-08	7.53135e-07
hsa-miR-148b-3p	1905.07	3266.31	3370	2456.99	2448	3159.41	5674	2897.52	3498	3618.03	8899	815.463	319	981.592	527	801.612	224	900.388	277	862.302	191	3079.65	872.272	3.52576	1.81793	7.31524e-11	1.23314e-09
hsa-miR-548j-3p	5.38204	5.32998	5	3.51214	3	5.28935	9	9.5245	11	11.5865	28	1.27615	0	2.79126	1	1.78533	0	1.62232	0	2.25144	0	7.04849	1.9453	3.53616	1.82218	0.000859194	0.00244301
hsa-miR-3605-3p	5.28088	6.29907	6	11.5399	11	5.84612	10	10.3527	12	13.2126	32	1.27615	0	2.79126	1	8.92664	2	1.62232	0	2.25144	0	9.45009	3.37356	3.53899	1.82334	0.000887999	0.00250479
hsa-miR-454-3p	121.989	134.219	138	88.807	88	187.911	337	142.039	171	174.61	429	34.4562	13	58.6164	31	26.7799	7	50.292	15	33.7716	7	145.517	40.7832	3.56727	1.83482	6.373e-06	3.26963e-05
hsa-miR-3611	4.92277	8.23724	8	4.51561	4	3.06226	5	15.322	18	8.74067	21	1.27615	0	2.79126	1	1.78533	0	1.62232	0	2.25144	0	7.97556	1.9453	3.61501	1.854	0.00125159	0.0033319
hsa-miR-186-5p	5553.13	11189.6	11546	10037.2	10002	11928	21423	9934.05	11994	10760.6	26468	3332.04	1305	3402.54	1828	2490.53	697	2503.24	771	2969.65	659	10769.9	2939.6	3.67736	1.87867	2.16525e-11	4.14323e-10
hsa-miR-30b-3p	14.022	23.7426	24	17.5607	17	24.2197	43	30.2299	36	24.1893	59	3.82846	1	6.51293	3	5.35599	1	8.11161	2	11.2572	2	23.9884	7.01324	3.67878	1.87923	3.6035e-05	0.000150075
hsa-miR-628-5p	17.1013	21.8045	22	40.6405	40	25.89	46	20.2913	24	22.9697	56	3.82846	1	15.8171	8	1.78533	0	8.11161	2	15.7601	3	26.3192	9.06052	3.69734	1.88649	0.000371502	0.00120653
hsa-miR-221-5p	341.2	659.464	680	597.566	595	759.161	1363	502.314	606	679.129	1670	358.6	140	136.772	73	141.041	39	89.2277	27	222.893	49	639.527	189.706	3.77069	1.91483	1.82079e-05	8.2636e-05
hsa-miR-374b-5p	588.736	782.538	807	477.149	475	792.567	1423	648.08	782	868.985	2137	121.235	47	205.623	110	201.742	56	261.194	80	173.361	38	713.864	192.631	3.78767	1.92131	2.10766e-08	1.88889e-07
hsa-miR-374c-3p	588.736	782.538	807	477.149	475	792.567	1423	648.08	782	868.985	2137	121.235	47	205.623	110	201.742	56	261.194	80	173.361	38	713.864	192.631	3.78767	1.92131	2.10766e-08	1.88889e-07
hsa-miR-27a-3p	23424.5	35887.7	37032	35281.5	35159	43325.1	77814	36241.5	43758	55939.3	137597	10736.3	4206	11078.5	5953	10795.9	3023	9281.3	2860	11363	2523	41335	10651	3.88436	1.95768	1.58059e-11	3.10849e-10
hsa-miR-642a-5p	46.6748	73.1661	75	32.6127	32	30.3442	54	47.6225	57	46.9557	115	11.4854	4	19.5388	10	5.35599	1	8.11161	2	15.7601	3	46.1402	12.0504	3.91262	1.96813	5.34535e-05	0.00021025
hsa-miR-1307-5p	198.802	365.83	377	169.084	168	310.958	558	245.566	296	226.241	556	42.1131	16	62.3381	33	108.905	30	76.2491	23	56.2861	12	263.536	69.1783	3.9185	1.9703	4.01244e-07	2.60625e-06
hsa-miR-23b-3p	77.0975	161.353	166	99.8451	99	227.442	408	124.647	150	138.834	341	29.3516	11	36.2863	19	37.4919	10	60.0259	18	29.2688	6	150.424	38.4849	3.93945	1.97799	1.02361e-05	5.03276e-05
hsa-miR-150-3p	79.3557	86.7333	89	103.859	103	108.292	194	141.211	170	104.685	257	75.2931	29	10.2346	5	16.068	4	37.3134	11	33.7716	7	108.956	34.5361	4.04317	2.01549	2.31762e-05	0.0001032
hsa-miR-3609	4.84971	12.1136	12	9.53295	9	8.07322	14	7.03985	8	9.96029	24	1.27615	0	6.51293	3	1.78533	0	1.62232	0	2.25144	0	9.34398	2.68964	4.04351	2.01561	0.000561675	0.0017215
hsa-miR-197-3p	783.962	1128.5	1164	1041.1	1037	1700.67	3054	1338.81	1616	1576.78	3878	200.356	78	404.732	217	344.568	96	329.331	101	407.511	90	1357.17	337.3	4.14261	2.05054	1.02834e-08	9.97344e-08
hsa-miR-218-5p	4.53663	23.7426	24	1.5052	1	7.51645	13	7.03985	8	11.993	29	1.27615	0	0.930419	0	1.78533	0	1.62232	0	6.75433	1	10.3594	2.47371	4.16271	2.05752	0.00478898	0.0106665
hsa-miR-1287-5p	59.1895	120.651	124	79.7758	79	104.952	188	99.8002	120	122.979	302	31.9039	12	45.5905	24	16.068	4	14.6009	4	24.7659	5	105.632	26.5858	4.17327	2.06118	1.12605e-06	6.75627e-06
hsa-miR-7-1-3p	57.9477	94.486	97	47.6648	47	108.292	194	68.3279	82	89.2361	219	16.59	6	30.7038	16	12.4973	3	11.3562	3	29.2688	6	81.6015	20.0832	4.26358	2.09207	7.81207e-06	3.95068e-05
hsa-miR-6513-3p	3.10571	8.23724	8	6.52255	6	3.06226	5	9.5245	11	8.74067	21	1.27615	0	0.930419	0	1.78533	0	1.62232	0	2.25144	0	7.21744	1.57313	4.42783	2.1466	0.000160395	0.000559408
hsa-miR-140-5p	1903.07	3179.09	3280	2918.59	2908	3321.99	5966	3362.15	4059	4478.68	11016	562.784	220	789.925	424	965.863	270	822.517	253	835.285	185	3452.1	795.275	4.43002	2.14731	2.67711e-11	4.85998e-10
hsa-miR-142-3p	21304.8	31092.7	32084	23832.9	23750	34648.3	62230	29341.7	35427	41677.3	102516	4478.03	1754	7786.67	4184	8339.27	2335	7123.61	2195	7787.74	1729	32118.6	7103.06	4.63032	2.21111	1.29823e-11	2.62613e-10
hsa-miR-3912-3p	16.585	19.8663	20	20.5711	20	40.3661	72	30.2299	36	33.1332	81	6.38077	2	4.65209	2	8.92664	2	4.86696	1	6.75433	1	28.8333	6.31616	4.70372	2.2338	5.10095e-06	2.69513e-05
hsa-let-7i-3p	110.6	156.508	161	176.109	175	226.329	406	161.088	194	194.937	479	49.77	19	41.8688	22	62.4865	17	14.6009	4	42.7774	9	182.994	42.3007	4.76077	2.2512	2.80709e-07	1.87492e-06
hsa-miR-616-5p	5.3594	12.1136	12	6.52255	6	15.3113	27	11.1809	13	7.52104	18	1.27615	0	0.930419	0	8.92664	2	1.62232	0	2.25144	0	10.5299	3.0014	4.92309	2.29956	0.000136765	0.000494028
hsa-miR-340-3p	69.7233	101.27	104	133.963	133	96.0435	172	94.8309	114	251.447	618	34.4562	13	19.5388	10	19.6386	5	24.3348	7	38.2745	8	135.511	27.2486	4.95766	2.30966	2.27556e-06	1.27865e-05
hsa-miR-664a-5p	30.7397	83.826	86	78.7723	78	74.8861	134	57.5611	69	56.7127	139	24.2469	9	13.9563	7	12.4973	3	14.6009	4	6.75433	1	70.3516	14.4111	5.06267	2.3399	2.37876e-07	1.61939e-06
hsa-miR-223-3p	213.322	109.991	113	1341.14	1336	464.628	834	183.45	221	177.862	437	47.2177	18	58.6164	31	48.2039	13	60.0259	18	74.2976	16	455.413	57.6723	5.16494	2.36875	0.000854628	0.00243983
hsa-miR-598-3p	115.121	225.313	232	147.008	146	266.416	478	183.45	221	201.035	494	42.1131	16	38.1472	20	37.4919	10	37.3134	11	38.2745	8	204.645	38.668	5.21986	2.38401	4.55406e-09	4.96043e-08
hsa-miR-30d-3p	36.2029	56.6916	58	57.6994	57	55.399	99	74.1254	89	76.2267	187	11.4854	4	12.0954	6	12.4973	3	8.11161	2	20.263	4	64.0284	12.8905	5.22003	2.38406	8.32832e-08	6.47961e-07
hsa-miR-192-5p	1766.27	3078.31	3176	2961.74	2951	2997.95	5384	2875.16	3471	4544.54	11178	417.303	163	572.207	307	919.444	257	611.615	188	619.147	137	3291.54	627.943	5.42724	2.44022	3.10829e-09	3.43855e-08
hsa-miR-664b-3p	4.38969	9.20633	9	5.51908	5	13.641	24	5.38341	6	8.74067	21	1.27615	0	0.930419	0	1.78533	0	1.62232	0	2.25144	0	8.49809	1.57313	5.45824	2.44844	9.55812e-06	4.7656e-05
hsa-miR-200b-3p	85.5102	234.035	241	153.029	152	151.164	271	197.53	238	204.694	503	59.9793	23	43.7297	23	23.2093	6	21.0902	6	29.2688	6	188.09	35.4554	5.48507	2.45551	9.99925e-08	7.53135e-07
hsa-miR-151a-5p	10.1006	28.5881	29	8.52948	8	19.7655	35	21.1195	25	35.1659	86	1.27615	0	6.51293	3	5.35599	1	8.11161	2	2.25144	0	22.6337	4.70162	5.51118	2.46236	0.00011345	0.000420538
hsa-miR-152-5p	7.45387	19.8663	20	5.51908	5	9.74354	17	12.0091	14	9.96029	24	1.27615	0	2.79126	1	1.78533	0	1.62232	0	2.25144	0	11.4197	1.9453	5.53208	2.46782	1.14305e-05	5.4681e-05
hsa-miR-24-2-5p	5.10778	10.1754	10	8.52948	8	11.4139	20	8.69628	10	12.8061	31	3.82846	1	0.930419	0	1.78533	0	1.62232	0	2.25144	0	10.3242	2.0836	5.60572	2.4869	1.18421e-05	5.58946e-05
hsa-miR-532-3p	14.9995	32.4644	33	12.5434	12	27.0035	48	22.776	27	21.75	53	1.27615	0	10.2346	5	19.6386	5	1.62232	0	2.25144	0	23.3075	7.00463	5.61296	2.48876	0.000141166	0.000502238
hsa-miR-32-3p	65.4208	78.0115	80	55.6925	55	82.1241	147	81.5794	98	96.1473	236	11.4854	4	12.0954	6	23.2093	6	14.6009	4	11.2572	2	78.711	14.5296	5.66383	2.50178	5.82942e-08	4.79874e-07
hsa-miR-181b-3p	24.4141	20.8354	21	15.5538	15	19.2087	34	28.5735	34	50.208	123	6.38077	2	4.65209	2	5.35599	1	1.62232	0	6.75433	1	26.8759	4.9531	5.75406	2.52458	1.39765e-05	6.55116e-05
hsa-miR-26a-5p	83012.4	153383	158275	146066	145561	145755	261785	167559	202312	223317	549308	23569.3	9234	26955.2	14485	29438.3	8244	29699.8	9153	34913.1	7753	167216	28915.1	5.79222	2.53412	9.30361e-15	5.48913e-13
hsa-miR-30d-5p	2845.34	5762.68	5946	5103.14	5085	6699.94	12033	5675.36	6852	8561.99	21060	1354	530	1160.23	623	830.178	232	958.792	295	1028.91	228	6360.62	1066.42	5.99253	2.58317	2.95004e-12	9.08098e-11
hsa-miR-15a-5p	147.128	292.18	301	190.157	189	366.079	657	215.751	260	266.489	655	42.1131	16	60.4772	32	44.6332	12	40.558	12	29.2688	6	266.131	43.4101	6.00763	2.5868	3.02068e-08	2.6403e-07
hsa-miR-140-3p	1546.18	3386.48	3494	3152.4	3141	3692.8	6632	3172.49	3830	3457.44	8504	705.714	276	492.191	264	508.819	142	498.053	153	497.569	110	3372.32	540.469	6.29913	2.65515	4.21958e-13	1.51884e-11
hsa-miR-194-3p	7.86567	15.9899	16	7.52601	7	15.8681	28	16.9785	20	18.4977	45	1.27615	0	2.79126	1	5.35599	1	1.62232	0	2.25144	0	14.972	2.65943	6.31891	2.65968	3.7126e-06	2.02194e-05
hsa-miR-374a-5p	313.408	506.348	522	432.997	431	593.242	1065	479.124	578	601.48	1479	49.77	19	105.137	56	91.0517	25	73.0044	22	114.824	25	522.638	86.7574	6.32424	2.66089	1.14356e-10	1.84009e-09
hsa-miR-3074-3p	5.22012	14.0518	14	16.5572	16	8.62999	15	12.0091	14	10.7734	26	1.27615	0	0.930419	0	5.35599	1	1.62232	0	2.25144	0	12.4043	2.28726	6.37092	2.6715	1.42078e-05	6.55116e-05
hsa-miR-374a-3p	208.672	278.613	287	254.379	253	301.493	541	319.278	385	387.638	953	31.9039	12	49.3122	26	76.7691	21	40.558	12	51.7832	11	308.28	50.0653	6.50013	2.70047	4.18405e-10	5.80844e-09
hsa-miR-2355-3p	7.49177	7.26815	7	11.5399	11	14.1977	25	20.2913	24	16.8715	41	1.27615	0	0.930419	0	1.78533	0	1.62232	0	11.2572	2	14.0337	3.37429	6.67437	2.73863	5.42106e-05	0.00021205
hsa-miR-361-3p	1457.12	3467.88	3578	2203.12	2195	3641.02	6539	2478.44	2992	2830.15	6961	800.149	313	454.975	244	262.443	73	319.597	98	344.471	76	2924.12	436.327	7.04308	2.81621	1.82204e-10	2.68751e-09
hsa-miR-3194-3p	11.8476	32.4644	33	21.5746	21	23.1061	41	12.8374	15	34.7594	85	3.82846	1	2.79126	1	1.78533	0	1.62232	0	15.7601	3	24.9484	5.15749	7.09137	2.82606	1.08309e-05	5.28845e-05
hsa-miR-499a-5p	42.0801	109.991	113	67.7341	67	97.157	174	80.7512	97	110.783	272	19.1423	7	15.8171	8	8.92664	2	17.8455	5	6.75433	1	93.2833	13.6972	7.13302	2.83451	2.21476e-07	1.52238e-06
hsa-let-7g-3p	11.3196	25.6808	26	23.5815	23	33.6848	60	26.0888	31	21.3435	52	3.82846	1	6.51293	3	1.78533	0	4.86696	1	2.25144	0	26.0759	3.84903	7.28774	2.86547	8.03962e-07	4.90694e-06
hsa-miR-29b-3p	602.937	1324.26	1366	1418.4	1413	1636.64	2939	901.514	1088	1170.23	2878	133.996	52	216.788	116	208.883	58	167.099	51	146.344	32	1290.21	174.622	7.32965	2.87375	9.67953e-12	2.21068e-10
hsa-miR-146b-5p	27032.5	77931.6	80417	55639.8	55447	68068.7	122255	51807.9	62553	64993.8	159869	11438.2	4481	7781.09	4181	7246.65	2029	7139.84	2200	9422.29	2092	63688.3	8605.61	7.45428	2.89807	1.93938e-14	1.05621e-12
hsa-miR-342-5p	141.525	312.531	322	529.33	527	309.845	556	344.952	416	301.858	742	72.7408	28	32.5647	17	37.4919	10	47.0473	14	56.2861	12	359.703	49.2262	7.47873	2.90279	5.57599e-10	7.06139e-09
hsa-miR-181c-5p	19.7386	32.4644	33	37.6301	37	61.5235	110	35.1992	42	59.5585	146	6.38077	2	15.8171	8	5.35599	1	4.86696	1	2.25144	0	45.2751	6.93446	7.54629	2.91577	3.00033e-06	1.67262e-05
hsa-miR-548a-3p	11.3495	24.7117	25	18.5642	18	16.9816	30	24.4324	29	25.8155	63	1.27615	0	0.930419	0	8.92664	2	1.62232	0	15.7601	3	22.1011	5.70313	7.57038	2.92037	1.5684e-05	7.16407e-05
hsa-miR-340-5p	1401.32	2691.64	2777	2372.7	2364	2427.81	4360	2657.33	3208	4122.55	10140	251.403	98	389.845	209	458.829	128	410.447	126	362.482	80	2854.41	374.601	7.71717	2.94807	1.27261e-11	2.62613e-10
hsa-miR-590-3p	149.253	248.571	256	228.289	227	314.299	564	240.597	290	317.713	781	29.3516	11	49.3122	26	44.6332	12	34.0687	10	20.263	4	269.894	35.5257	7.75356	2.95486	5.99059e-10	7.44094e-09
hsa-miR-26a-2-3p	33.6505	50.8771	52	38.6335	38	81.5674	146	52.5918	63	51.4276	126	19.1423	7	12.0954	6	1.78533	0	4.86696	1	6.75433	1	55.0195	8.92888	7.77138	2.95817	1.34668e-06	8.0122e-06
hsa-miR-194-5p	290.359	560.617	578	476.146	474	496.364	891	489.89	591	774.26	1904	62.5316	24	92.1114	49	98.1931	27	66.5152	20	42.7774	9	559.455	72.4257	7.80254	2.96394	1.90359e-09	2.13928e-08
hsa-miR-4772-5p	149.605	435.605	449	224.275	223	397.815	714	190.076	229	446.587	1098	62.5316	24	40.008	21	30.3506	8	21.0902	6	65.2918	14	338.872	43.8544	8.04659	3.00838	6.3397e-07	3.97213e-06
hsa-miR-4772-3p	162.903	547.05	564	292.511	291	533.111	957	222.376	268	444.961	1094	65.0839	25	53.0339	28	19.6386	5	37.3134	11	60.7889	13	408.002	47.1717	8.78891	3.13569	1.66928e-07	1.18846e-06
hsa-miR-26b-3p	68.172	134.219	138	97.8382	97	145.04	260	120.506	145	167.699	412	16.59	6	17.678	9	19.6386	5	17.8455	5	6.75433	1	133.06	15.7013	8.83182	3.14271	8.21873e-09	8.08175e-08
hsa-miR-505-3p	33.3878	61.537	63	41.6439	41	55.399	99	55.0764	66	73.7875	181	1.27615	0	10.2346	5	16.068	4	8.11161	2	6.75433	1	57.4888	8.48893	8.93448	3.15938	3.9322e-07	2.57778e-06
hsa-miR-200a-3p	67.1925	184.611	190	149.015	148	133.347	239	154.462	186	168.512	414	21.6946	8	10.2346	5	19.6386	5	17.8455	5	20.263	4	157.99	17.9353	9.25194	3.20976	5.51464e-10	7.06139e-09
hsa-miR-28-5p	1022.42	2895.15	2987	2202.11	2194	2530.26	4544	2396.45	2893	2816.32	6927	220.775	86	278.195	149	316.003	88	261.194	80	285.933	63	2568.06	272.42	9.51789	3.25064	2.5016e-14	1.18075e-12
hsa-miR-32-5p	755.256	1098.46	1133	796.252	793	1132.2	2033	799.644	965	1496.28	3680	65.0839	25	92.1114	49	144.612	40	105.451	32	209.384	46	1064.57	123.328	9.55878	3.25683	4.00885e-11	7.09567e-10
hsa-miR-1277-3p	16.7112	44.0935	45	30.6058	30	48.1609	86	33.5428	40	35.1659	86	3.82846	1	0.930419	0	5.35599	1	8.11161	2	6.75433	1	38.3138	4.99616	9.9215	3.31056	1.67862e-07	1.18846e-06
hsa-let-7a-3p	142.389	359.047	370	248.358	247	317.639	570	266.272	321	321.372	790	37.0085	14	40.008	21	19.6386	5	17.8455	5	42.7774	9	302.538	31.4556	10.0598	3.33053	1.41476e-10	2.22588e-09
hsa-miR-664a-3p	73.3529	219.498	226	107.873	107	241.361	433	135.413	163	114.442	281	19.1423	7	19.5388	10	5.35599	1	14.6009	4	20.263	4	163.718	15.7802	10.626	3.40953	4.89104e-08	4.12245e-07
hsa-miR-30e-5p	1851.63	4413.71	4554	3430.36	3418	4913.81	8825	3695.92	4462	5024.26	12358	391.78	153	423.34	227	405.27	113	407.203	125	380.494	84	4295.61	401.617	10.6625	3.41448	7.34943e-15	4.83731e-13
hsa-miR-3065-5p	9.37469	22.7735	23	13.5468	13	33.6848	60	21.1195	25	29.0678	71	1.27615	0	4.65209	2	1.78533	0	1.62232	0	2.25144	0	24.0385	2.31747	11.2595	3.49307	6.01333e-08	4.838e-07
hsa-miR-1-3p	51.7207	160.384	165	73.7549	73	161.743	290	65.8433	79	223.395	549	42.1131	16	17.678	9	5.35599	1	14.6009	4	2.25144	0	137.024	16.3999	11.2788	3.49554	3.18198e-06	1.76003e-05
hsa-miR-342-3p	2249.64	6031.11	6223	3148.38	3137	8440.41	15159	3813.53	4604	4496.56	11060	465.797	182	477.305	256	337.427	94	433.16	133	403.008	89	5186	423.339	11.6194	3.53846	3.79052e-12	1.07348e-10
hsa-miR-30b-5p	438.714	961.819	992	562.444	560	1461.81	2625	677.896	818	786.863	1935	39.5608	15	93.9723	50	94.6224	26	105.451	32	47.2803	10	890.166	76.1773	11.8721	3.5695	3.11939e-10	4.41706e-09
hsa-miR-95-3p	40.4142	115.806	119	85.7966	85	111.633	200	89.0333	107	128.264	315	6.38077	2	12.0954	6	12.4973	3	4.86696	1	11.2572	2	106.107	9.41954	12.012	3.58641	4.50585e-10	6.13489e-09
hsa-miR-876-5p	9.84053	13.0827	13	15.5538	15	12.5274	22	36.8557	44	54.2734	133	3.82846	1	0.930419	0	1.78533	0	1.62232	0	2.25144	0	26.4586	2.0836	12.3487	3.62628	3.87469e-06	2.09411e-05
hsa-miR-22-3p	9473.98	28732	29648	18785.4	18720	21185	38049	23202.9	28015	30439.7	74874	2201.37	862	1474.71	792	1958.51	548	1941.92	598	2303.23	511	24469	1975.95	12.4989	3.64373	1.31478e-15	1.16358e-13
hsa-miR-29c-5p	39.4127	77.0424	79	74.7584	74	116.087	208	62.5304	75	85.9838	211	8.93308	3	10.2346	5	8.92664	2	1.62232	0	6.75433	1	83.2805	7.2942	13.1152	3.71316	6.71117e-09	6.88624e-08
hsa-miR-181a-5p	58216.9	151273	156098	98194.9	97855	123784	222323	131533	158814	229459	564416	12083.9	4734	9119.03	4900	8514.23	2384	10283.9	3169	12313.1	2734	146849	10462.8	13.6418	3.76997	6.5759e-15	4.83731e-13
hsa-miR-31-5p	11.8178	14.0518	14	8.52948	8	45.3771	81	21.9478	26	67.6893	166	1.27615	0	0.930419	0	1.78533	0	1.62232	0	6.75433	1	31.5191	2.47371	14.3253	3.84049	1.42497e-05	6.55116e-05
hsa-miR-22-5p	231.502	705.98	728	516.285	514	554.268	995	575.197	694	727.508	1789	49.77	19	40.008	21	44.6332	12	21.0902	6	65.2918	14	615.848	44.1587	14.8817	3.89547	1.05907e-11	2.27219e-10
hsa-miR-3074-5p	1442.74	2102.43	2169	1770.62	1764	3279.12	5889	2921.54	3527	3690.8	9078	340.733	133	488.47	262	248.161	69	53.5366	16	33.7716	7	2752.9	232.934	16.3328	4.0297	1.24494e-08	1.19111e-07
hsa-miR-876-3p	18.8358	20.8354	21	25.5885	25	17.5384	31	75.7819	91	116.474	286	1.27615	0	0.930419	0	1.78533	0	11.3562	3	2.25144	0	51.2437	3.51992	18.499	4.20938	2.74755e-05	0.000120824
hsa-miR-338-5p	178.683	508.286	524	397.875	396	435.675	782	460.903	556	664.494	1634	19.1423	7	21.3996	11	23.2093	6	27.5795	8	42.7774	9	493.447	26.8216	19.4443	4.28127	1.05097e-11	2.27219e-10
hsa-miR-181b-2-3p	15.5479	50.8771	52	31.6093	31	34.2416	61	33.5428	40	61.9978	152	1.27615	0	4.65209	2	1.78533	0	1.62232	0	2.25144	0	42.4537	2.31747	19.7187	4.3015	1.92896e-08	1.77364e-07
hsa-miR-142-5p	11674.1	25068.8	25868	17596.3	17535	22825.8	40996	20215.5	24408	27388.6	67369	886.928	347	1169.54	628	1337.21	374	923.101	284	1497.21	332	22619	1162.8	19.927	4.31666	1.29515e-16	1.52828e-14
hsa-miR-1277-5p	17.9969	35.3717	36	28.5989	28	32.0145	57	42.6532	51	56.3062	138	1.27615	0	2.79126	1	1.78533	0	1.62232	0	2.25144	0	38.9889	1.9453	20.4602	4.35475	1.49676e-10	2.25469e-09
hsa-miR-1248	75.0208	399.748	412	104.862	104	184.014	330	131.272	158	95.7408	235	8.93308	3	4.65209	2	8.92664	2	17.8455	5	2.25144	0	183.128	8.52176	22.4845	4.49086	2.80777e-08	2.48487e-07
hsa-miR-141-3p	19.0037	54.7534	56	43.6509	43	59.8532	107	50.9354	61	52.2407	128	1.27615	0	0.930419	0	1.78533	0	4.86696	1	2.25144	0	52.2867	2.22206	28.2123	4.81825	3.08602e-10	4.41706e-09
hsa-miR-26b-5p	14797.5	41808.8	43142	39989.7	39851	41457.1	74459	36475.1	44040	45411.4	111701	2004.84	785	1467.27	788	1205.1	337	1130.76	348	1420.66	315	41028.4	1445.72	28.8721	4.8516	5.57297e-19	3.94566e-16
hsa-miR-101-3p	3267.84	7856.87	8107	7354.92	7329	8868.57	15928	6938.39	8377	10712.2	26349	205.461	80	339.603	182	387.416	108	248.215	76	254.413	56	8346.19	287.022	29.7569	4.89515	3.93913e-17	9.29635e-15
hsa-miR-873-5p	111.116	165.229	170	179.119	178	111.633	200	415.351	501	670.592	1649	8.93308	3	4.65209	2	1.78533	0	21.0902	6	15.7601	3	308.385	10.4442	33.8654	5.08174	6.07891e-07	3.84274e-06
hsa-miR-150-5p	16305.4	35463.3	36594	36236.8	36111	63996.4	114941	40130.8	48454	42147.3	103672	1198.31	469	940.653	505	1040.85	291	1344.9	414	1753.87	389	43594.9	1255.72	35.4451	5.14751	6.59663e-17	1.1676e-14
hsa-miR-181a-2-3p	3355.67	9358.96	9657	6319.34	6297	6275.68	11271	9889.33	11940	15513.5	38159	167.176	65	201.901	108	187.459	52	231.992	71	348.974	77	9471.35	227.5	41.92	5.38957	2.17033e-14	1.09757e-12
hsa-miR-338-3p	82.3276	299.932	309	158.046	157	275.881	495	159.432	192	320.559	788	1.27615	0	2.79126	1	1.78533	0	1.62232	0	6.75433	1	242.77	2.84588	100.701	6.65393	5.1546e-11	8.90111e-10
hsa-miR-3607-3p	77.0776	247.602	255	122.925	122	211.296	379	165.229	199	225.021	553	1.27615	0	2.79126	1	1.78533	0	1.62232	0	2.25144	0	194.415	1.9453	100.973	6.65782	8.93262e-14	3.72017e-12
hsa-miR-29c-3p	104.61	303.809	313	294.518	293	386.679	694	183.45	221	262.83	646	1.27615	0	0.930419	0	1.78533	0	1.62232	0	2.25144	0	286.257	1.57313	185.918	7.53853	1.79624e-13	7.06521e-12
