# Supplementary material for: Natural killer (NK) cell-derived extracellular-vesicle shuttled microRNAs control T cell responses
Source: eLife. 2022 Jul 29;11:e76319. doi: 10.7554/eLife.76319 (PMC9366747; doi:10.7554/eLife.76319)
Supplement: Supplementary file 3. — Specific primers for the detection of mRNA related with T cell functions are shown in orange and dendritic cell (DC) function-related miRNAs in blue. Housekeeping mRNAs are shown in grey. [file elife-76319-supp3.xlsx]

## Sheet: Antibodies
Antibodies
Antigen	Specificity	Assay	Conjugated	Clone number	Catalog number	Supplier
CD4	human	Flow cytometry	PE	RPA-T4	50-0049-T500	TONBO Bioscience
CD4	mouse	Flow cytometry	PercP	RM4-5	67-0042-U100	TONBO Bioscience
CD4	mouse	Flow cytometry	PE-Cy7	GK1.5	60-0041-U100	TONBO Bioscience
Ifn-Ɣ	human	Flow cytometry	FITC		554551	BD Pharmingen
Ifn-Ɣ	mouse	Flow cytometry	FITC	XMG1.2	11-7311-82	Invitrogen
T-bet	human/mouse	Flow cytometry	PercPCy5.5	eBio4B10	45-5825-82	Invitrogen
T-bet	human/mouse	Flow cytometry	PE	eBio4B10	12-5825-82	eBioscience
CD25	human	Flow cytometry	PE-Cy7	BC96	302612	BioLegend
CD25	mouse	Flow cytometry	eF450	PC61.5	48-0251-82	eBioscience
CD69	human	Flow cytometry	V450	FN50	560740	BD Biosciences
HLA-DR	human	Flow cytometry	FITC		347363	BD
CD86	human	Flow cytometry	PE		500869-T100	TONBO Bioscience
CD11c	human	Flow cytometry	PE-Cy7		561356	BD Pharmingen
CD209/DC-SIGN	human	Flow cytometry	APC	eB-h209	17-2099-42	Invitrogen
CD3	human	Flow cytometry	BV510	OKT3	317332	BioLegend
CD56	human	Flow cytometry	PE		5PE1-100T	Immunostep
GATA-3	human	Flow cytometry	PE-Cy7	TWAJ	25-9966-42	Thermo Scientific
CD8	mouse	Flow cytometry	PE	53-6.7	553032	BD Biosciences
TCRβ	mouse	Flow cytometry	APC-Cy7	H57-597	109220	BioLegend
CD63	human	Western Blot	NA	NK1/C-3	OP171	Calbiochem
CD81	human	Western Blot	NA	5A6	sc-23962	Santa Cruz
Calnexin	human	Western Blot	NA		ab10286	Abcam
Tsg101	human	Western Blot	NA		ab83	Abcam
GATA-3	human	Western Blot	NA	HG3-31	sc-268	Santa Cruz
T-BET	human	Western Blot	NA	4B10	sc-21749	Santa Cruz
FOXP3	mouse	Flow cytometry	FITC	FJK-165	11-5773-82	eBioscience
Annexin V	human	Flow cytometry	APC		550474	BD Pharmingen

## Sheet: mRNA primers
Primers mRNA targets (Human)
		Primer-FORWARD	Primers-REVERSE
	Targets	Sequence	Sequence
1	SHIP1	GCGTGCTGTATCGGAATTGC	TGGTGAAGAACCTCATGGAGAC
2	SOCS1	CACGCACTTCCGCACATTC	TAAGGGCGAAAAAGCAGTTCC
3	GATA3	GCCCCTCATTAAGCCCAAG	TTGTGGTGGTCTGACAGTTCG
4	TBX21	GGTTGCGGAGACATGCTGA	GTAGGCGTAGGCTCCAAGG
5	PTEN	TGGATTCGACTTAGACTTGACCT	GGTGGGTTATGGTCTTCAAAAGG
6	IFNG P2	CTGTTACTGCCAGCAGGACCCAT	CGCTACATCTGAATGACCTGC
7	BCL2L11	TAAGTTCTGAGTGTGACCGAGA	GCTCTGTCTGTAGGGAGGTAGG
8	IFNG P2	CTGTTACTGCCAGCAGGACCCAT	CGCTACATCTGAATGACCTGC
9	FOXO1	TCGTCATAATCTGTCCCTACACA	CGGCTTCGGCTCTTAGCAAA
10	NOTCH1	GAGGCGTGGCAGACTATGC	CTTGTACTCCGTCAGCGTGA
11	VEGFR2	GGCCCAATAATCAGAGTGGCA	CCAGTGTCATTTCCGATCACTTT
12	KLF13	CGGCCTCAGACAAAGGGTC	TTCCCGTAAACTTTCTCGCAG
13	GAPDH	AGCCACATCGCTCAGACAC	GCCCAATACGACCAAATCC
14	ACTB	CCAGAGGCGTCAAGGGATAG	CCAACCGCGAGAAGATGA
Primers mRNA targets (Mouse)
		Primer-FORWARD	Primers-REVERSE
	Targets	Sequence	Sequence
1	Il10	GCTCTTACTGACTGGCATGAG	CGCAGCTCTAGGAGCATGTG
2	Tbx21	CAA​CAA​CCC​CTT​TGC​CAA​AG	TCC​CCC​AAG​CAG​TTG​ACA​GT
3	Ifng	CGGCACAGTCATTGAAAGCC	TGCATCCTTTTTCGCCTTGC
13	Gapdh	AGCTTGTCATCAACGGGAAG	TTTGATGTTAGTGGGGTCTCG
14	Actb	CAGAAGGAGATTACTGCTCTGGCT	TACTCCTGCTTGCTGATCCACATC
